# Supplementary material for: Methylmercury Induced Neurotoxicity and the Influence of Selenium in the Brains of Adult Zebrafish (Danio rerio)
Source: Int J Mol Sci. 2017 Mar 29;18(4):725. doi: 10.3390/ijms18040725 (PMC5412311; doi:10.3390/ijms18040725)
Supplement: Supplementary file 1 [file ijms-18-00725-s001.xlsx]

## Sheet: Table headings
Tab Heading	Table Heading
Supplementary Table 1	Protein fold-change data, associated p-values for all statistically analysed, identified and Ingenuity Pathway Analysis (IPA) mapped genes. Protein identification features include accession numbers, protein names, isoelectric point, molecular weight, coverage (in % of detectable peptide sequences) and number of positively identified peptides. Protein match confidence and validation accuracy value…
Supplementary Table 2A	Ingenuity Pathway Analysis (IPA): 'Canonical Pathways' enriched with regulated (p<0.05, 2w ANOVA) proteins in brain of zebrafish (Danio rerio), exposed to methylmercury-cysteine (MeHg) and selenomethionine (SeMet) in a factorial design.
Supplementary Table 2B	Ingenuity Pathway Analysis (IPA): Overview of 'Diseases and Bio Functions' enriched with regulated (p<0.05, 2wANOVA) proteins in brain of zebrafish (Danio rerio), exposed to methylmercury-cysteine (MeHg) and selenomethionine (SeMet) in a factorial design.
Supplementary Table 2C	Ingenuity Pathway Analysis (IPA): Detailed view on 'Diseases and Bio Functions' enriched with regulated (p<0.05, 2wANOVA) proteins in brain of zebrafish (Danio rerio), exposed to methylmercury-cysteine (MeHg) and selenomethionine (SeMet) in a factorial design.
Supplementary Table 2D	Ingenuity Pathway Analysis (IPA): 'Upstream Regulators' enriched with regulated (p<0.05, 2wANOVA) proteins in brain of zebrafish (Danio rerio), exposed to methylmercury-cystein (MeHg) and selenomethionine (SeMet) in a factorial design. .

## Sheet: Supplementary Table 1
Spot	Hg-FC	Se-FC	Hg p-Val	Se p-Val	Se x Hg p-Val	Protein Name	Accession	Gene	IPA	IPA ID	pI	mW	Coverage	Peptides	Validated Peptides	Score	Confidence	Validation
305		1.2736		0.00623663		Alpha-1,4 glucan phosphorylase (E7EXT3_DANRE)	E7EXT3	pygmb	NO		6.35	96803.3	7.84	9	6	100	95.2756	Confident
307		1.18691		0.00162772		Alpha-1,4 glucan phosphorylase (E7EXT3_DANRE)	E7EXT3	pygmb	NO		6.35	96803.3	7.84	9	6	100	95.2756	Confident
456		-1.15851		0.025357		Histone H4 (A3KPR4_DANRE)	A3KPR4	si:dkey-108k21.23	NO		11.36	11360.4	40.78	4	4	100	95.2756	Confident
477		1.31723		0.00524006		Uncharacterized protein (B0UXI4_DANRE)	B0UXI4	syn1	YES	SYN1	9.38	72309.2	20.9	14	10	100	95.2756	Confident
480					0.0423171	Uncharacterized protein (F1RDA6_DANRE)	F1RDA6	ndufs1	YES	NDUFS1	5.82	79410.4	14.36	13	9	100	95.2756	Confident
480					0.0423171	NADH dehydrogenase (Ubiquinone) Fe-S protein 1 (Q5RKM2_DANRE)	Q5RKM2	ndufs1	YES	NDUFS1	5.82	79382.4	14.36	13	9	100	95.2756	Confident
491		1.11909		0.00892595		Uncharacterized protein (B0UXI4_DANRE)	B0UXI4	syn1	YES	SYN1	9.38	72309.2	20.9	14	10	100	95.2756	Confident
500		-1.13519		0.00802459		TNF receptor-associated protein 1 (A8WFV1_DANRE)	A8WFV1	trap1	YES	TRAP1	6.52	82067	9.18	6	6	100	95.2756	Confident
500		-1.13519		0.00802459		Uncharacterized protein (E7F4F1_DANRE)	E7F4F1	trap1	YES	TRAP1	n.a.	n.a.	9.18	6	6	100	95.2756	Confident
500		-1.13519		0.00802459		Uncharacterized protein (F1Q9X9_DANRE)	F1Q9X9	trap1	YES	TRAP1	6.57	88726.3	9.18	6	6	100	95.2756	Confident
500		-1.13519		0.00802459		Uncharacterized protein (Fragment) (F1R0C3_DANRE)	F1R0C3	trap1	YES	TRAP1	n.a.	n.a.	9.18	6	6	100	95.2756	Confident
546	1.12954		0.0134764			Uncharacterized protein (F1QFC0_DANRE)	F1QFC0	hspa9	YES	HSPA9	6.72	73906	21.99	12	11	100	95.2756	Confident
546	1.12954		0.0134764			Heat shock protein 9 (Q5XJ12_DANRE)	Q5XJ12	hspa9	YES	HSPA9	6.72	73922.1	21.99	12	11	100	95.2756	Confident
546	1.12954		0.0134764			Heat shock protein 9 (Q7ZYY3_DANRE)	Q7ZYY3	hspa9	YES	HSPA9	7.06	73848	21.99	12	11	100	95.2756	Confident
557		1.12555		0.0376076		Uncharacterized protein (A8DZ95_DANRE)	A8DZ95	dpysl2b	NO		5.86	58248.5	32.29	20	16	100	95.2756	Confident
557		1.12555		0.0376076		Collapsin response mediator protein 2 (Q52PJ3_DANRE)	Q52PJ3	dpysl2b	NO		6.05	62369.7	32.29	20	16	100	95.2756	Confident
558		1.07824		0.0146011		Uncharacterized protein (A8DZ95_DANRE)	A8DZ95	dpysl2b	NO		5.86	58248.5	32.29	20	16	100	95.2756	Confident
558		1.07824		0.0146011		Collapsin response mediator protein 2 (Q52PJ3_DANRE)	Q52PJ3	dpysl2b	NO		6.05	62369.7	32.29	20	16	100	95.2756	Confident
562	-1.08185	1.10544	0.0200236	0.00580237		Uncharacterized protein (F1QM13_DANRE)	F1QM13	stxbp1a	YES	STXBP1	6.25	67032.2	20.98	12	11	100	95.2756	Confident
562	-1.08185	1.10544	0.0200236	0.00580237		Syntaxin binding protein 1 (Q4QRD0_DANRE)	Q4QRD0	stxbp1a	YES	STXBP1	6.21	67086.2	20.98	12	11	100	95.2756	Confident
567		1.06345		0.0311626		Sdha protein (B2GQ13_DANRE)	B2GQ13	sdha	YES	SDHA	6.2	72014.6	18	17	9	100	95.2756	Confident
567		1.06345		0.0311626		Succinate dehydrogenase [ubiquinone] flavoprotein subunit, mitochondrial (SDHA_DANRE)	Q7ZVF3	sdha	YES	SDHA	5.74	67802.4	18	17	9	100	95.2756	Confident
568	-1.21474		0.0110575			Sdha protein (B2GQ13_DANRE)	B2GQ13	sdha	YES	SDHA	6.2	72014.6	18	17	9	100	95.2756	Confident
568	-1.21474		0.0110575			Succinate dehydrogenase [ubiquinone] flavoprotein subunit, mitochondrial (SDHA_DANRE)	Q7ZVF3	sdha	YES	SDHA	5.74	67802.4	18	17	9	100	95.2756	Confident
573	1.19619		0.0045347			Uncharacterized protein (A8DZ95_DANRE)	A8DZ95	dpysl2b	NO		5.86	58248.5	32.29	20	16	100	95.2756	Confident
573	1.19619		0.0045347			Collapsin response mediator protein 2 (Q52PJ3_DANRE)	Q52PJ3	dpysl2b	NO		6.05	62369.7	32.29	20	16	100	95.2756	Confident
608		1.0961		0.0285169		Uncharacterized protein (A2BEN1_DANRE)	A2BEN1	atp6v1aa	YES	ATP6V1A	5.41	68334.7	24.8	20	14	100	95.2756	Confident
608		1.0961		0.0285169		Uncharacterized protein (E7FCD8_DANRE)	E7FCD8	atp6v1ab	YES	ATP6V1A	5.42	68334.6	21.56	20	12	100	95.2756	Confident
608		1.0961		0.0285169		ATPase, H+ transporting, lysosomal V1 subunit A, like (Q7SY46_DANRE)	Q7SY46	atp6v1aa	YES	ATP6V1A	5.47	68262.7	24.8	20	14	100	95.2756	Confident
640		1.13859		0.0431494		Dihydropyrimidinase-related protein 3 (E7F6Q2_DANRE)	E7F6Q2	dpysl3	YES	DPYSL3	n.a.	n.a.	25.04	16	11	100	95.2756	Confident
640		1.13859		0.0431494		Dihydropyrimidinase-related protein 3 (DPYL3_DANRE)	Q52PJ5	dpysl3	YES	DPYSL3	6	61505	25.04	16	11	100	95.2756	Confident
647		1.14205		0.0259284		Dihydropyrimidinase-related protein 3 (E7F6Q2_DANRE)	E7F6Q2	dpysl3	YES	DPYSL3	n.a.	n.a.	25.04	16	11	100	95.2756	Confident
647		1.14205		0.0259284		Dihydropyrimidinase-related protein 3 (DPYL3_DANRE)	Q52PJ5	dpysl3	YES	DPYSL3	6	61505	25.04	16	11	100	95.2756	Confident
672					0.0295326	Uncharacterized protein (A8DZ95_DANRE)	A8DZ95	dpysl2b	NO		5.86	58248.5	32.29	20	16	100	95.2756	Confident
672					0.0295326	Collapsin response mediator protein 2 (Q52PJ3_DANRE)	Q52PJ3	dpysl2b	NO		6.05	62369.7	32.29	20	16	100	95.2756	Confident
704	1.2099		0.00802133			Heat shock 60kD protein 1 (Chaperonin) (Q803B0_DANRE)	Q803B0	hspd1	YES	HSPD1	5.56	61157.9	5.04	5	3	100	95.2756	Confident
710	1.14117		0.0246582			Chaperonin containing TCP1, subunit 8 (Theta) (Q6TNV4_DANRE)	Q6TNV4	cct8	YES	CCT8	5.21	59262.8	20.33	10	10	100	95.2756	Confident
710	1.14117		0.0246582			Cct8 protein (Q7ZU96_DANRE)	Q7ZU96	cct8	YES	CCT8	5.21	59262.8	20.33	10	10	100	95.2756	Confident
719	1.15275		0.0314782			Uncharacterized protein (X1WHB9_DANRE)	X1WHB9	zgc:114181	NO		5.53	52742	25.25	18	12	100	95.2756	Confident
719	1.15275		0.0314782			Chaperonin containing TCP1, subunit 5 (Epsilon) (Q6NVI6_DANRE)	Q6NVI6	cct5	YES	CCT5	5.38	59356.9	18.67	22	12	100	95.2756	Confident
726	1.15195		0.0346906			Chaperonin containing TCP1, subunit 5 (Epsilon) (Q6NVI6_DANRE)	Q6NVI6	cct5	YES	CCT5	5.38	59356.9	18.67	22	12	100	95.2756	Confident
779		1.09035		0.0141255		Collapsin response mediator protein 5.2 (Q52PJ8_DANRE)	Q52PJ8	dpysl5b	NO		6.32	61289.7	9.68	7	5	100	95.2756	Confident
779		1.09035		0.0141255		Dihydropyrimidinase-like 5b (Q5RGY8_DANRE)	Q5RGY8	dpysl5b	NO		6.29	61324.7	9.68	7	5	100	95.2756	Confident
796		1.21969		0.00106372		Glucose-6-phosphate isomerase (F1QZL6_DANRE)	F1QZL6	gpia	YES	GPI	6.45	62045.3	16.09	15	8	100	95.2756	Confident
796		1.21969		0.00106372		Glucose-6-phosphate isomerase (Q5XJ09_DANRE)	Q5XJ09	gpia	YES	GPI	6.45	62003.2	16.09	15	8	100	95.2756	Confident
796		1.21969		0.00106372		Glucose-6-phosphate isomerase (Q7ZU30_DANRE)	Q7ZU30	gpia	YES	GPI	6.45	62033.2	16.09	15	8	100	95.2756	Confident
821		1.06039		0.0395913		Uncharacterized protein (F1QR17_DANRE)	F1QR17	aldh7a1	YES	ALDH7A1	7.13	59049.3	11.15	12	7	100	95.2756	Confident
821		1.06039		0.0395913		Aldehyde dehydrogenase 7 family, member A1 (Q803R9_DANRE)	Q803R9	aldh7a1	YES	ALDH7A1	5.94	55568.2	11.15	12	7	100	95.2756	Confident
838		1.0602		0.0439037		ATPase, H+ transporting, lysosomal V1 subunit B2 (A4FUM8_DANRE)	A4FUM8	atp6v1b2	YES	ATP6V1B2	5.5	56441.8	28.68	20	13	100	95.2756	Confident
838		1.0602		0.0439037		Vacuolar-type H+ transporting ATPase subunit B2 (Q8QHA6_DANRE)	Q8QHA6	atp6v1b2	YES	ATP6V1B2	5.52	56488.9	28.68	20	13	100	95.2756	Confident
855		1.06838		0.0191706		Tubulin, beta 2c (Q6P5M9_DANRE)	Q6P5M9	tubb4b	YES	TUBB4B	4.79	49755	37.53	24	16	100	95.2756	Confident
856		1.09383		0.0211376		Uncharacterized protein (F1QAM8_DANRE)	F1QAM8	vim	YES	VIM	5.1	52505.4	39.56	26	17	100	95.2756	Confident
856		1.09383		0.0211376		Vimentin (Q9YHX5_DANRE)	Q9YHX5	vim	YES	VIM	5.1	52475.4	39.56	26	17	100	95.2756	Confident
878					0.0390396	ATP synthase subunit alpha (Q08BA1_DANRE)	Q08BA1	atp5a1	YES	ATP5A1	9.08	59706.7	19.42	11	9	100	95.2756	Confident
878					0.0390396	ATPase, H+ transporting, lysosomal, V1 subunit B, member a (Q6PC68_DANRE)	Q6PC68	atp6v1ba	YES	ATP6V1B1	5.39	55950.5	16.6	16	7	100	95.2756	Confident
878					0.0390396	Vacuolar-type H+ transporting ATPase subunit B1 (Q8QHA7_DANRE)	Q8QHA7	atp6v1ba	YES	ATP6V1B1	5.39	55880.4	16.6	16	7	100	95.2756	Confident
880	-1.02944		0.0102869			ATPase, H+ transporting, lysosomal V1 subunit B2 (A4FUM8_DANRE)	A4FUM8	atp6v1b2	YES	ATP6V1B2	5.5	56441.8	28.68	20	13	100	95.2756	Confident
880	-1.02944		0.0102869			ATP synthase subunit alpha (Q08BA1_DANRE)	Q08BA1	atp5a1	YES	ATP5A1	9.08	59706.7	19.42	11	9	100	95.2756	Confident
880	-1.02944		0.0102869			ATPase, H+ transporting, lysosomal, V1 subunit B, member a (Q6PC68_DANRE)	Q6PC68	atp6v1ba	YES	ATP6V1B1	5.39	55950.5	16.6	16	7	100	95.2756	Confident
880	-1.02944		0.0102869			Vacuolar-type H+ transporting ATPase subunit B1 (Q8QHA7_DANRE)	Q8QHA7	atp6v1ba	YES	ATP6V1B1	5.39	55880.4	16.6	16	7	100	95.2756	Confident
895					0.0105001	Uncharacterized protein (F1QR17_DANRE)	F1QR17	aldh7a1	YES	ALDH7A1	7.13	59049.3	11.15	12	7	100	95.2756	Confident
895					0.0105001	ATP synthase subunit alpha (Q08BA1_DANRE)	Q08BA1	atp5a1	YES	ATP5A1	9.08	59706.7	19.42	11	9	100	95.2756	Confident
906		1.04556		0.0426798		Uncharacterized protein (F1R3Q3_DANRE)	F1R3Q3	sept6	YES	SEPT6	6.53	49570.2	13.58	9	5	100	95.2756	Confident
906		1.04556		0.0426798		Septin 6 (Q6PHD7_DANRE)	Q6PHD7	sept6	YES	SEPT6	6.53	48924.9	13.58	9	5	100	95.2756	Confident
1034		1.06248		0.00379672		Proteasome (Prosome, macropain) 26S subunit, ATPase 2 (Q7T3B1_DANRE)	Q7T3B1	psmc2	YES	PSMC2	5.72	48673.2	15.01	9	6	100	95.2756	Confident
1035	1.04536		0.0382833			Enolase (E9QCX7_DANRE)	E9QCX7	eno1a	YES	ENO1	5.43	33127	15.28	7	6	100	95.2756	Confident
1035	1.04536		0.0382833			Enolase 1, (Alpha) (Q6IQP5_DANRE)	Q6IQP5	eno1a	YES	ENO1	6.16	47030.2	15.28	7	6	100	95.2756	Confident
1035	1.04536		0.0382833			Enolase 1, (Alpha) (Q6PC12_DANRE)	Q6PC12	eno1a	YES	ENO1	6.16	47044.2	15.28	7	6	100	95.2756	Confident
1081					0.0309358	Uncharacterized protein (F1Q4N4_DANRE)	F1Q4N4	ndufs2	YES	NDUFS2	6.37	52678.3	8.62	7	5	100	95.2756	Confident
1100					0.00653674	Uncharacterized protein (Fragment) (B8A4G3_DANRE)	B8A4G3	ppm1aa	YES	PPM1A	4.51	24191.88	17.45	7	6	100	95.2756	Confident
1100					0.00653674	Protein phosphatase type 2C alpha 2 (Q6NYP6_DANRE)	Q6NYP6	ppm1aa	YES	PPM1A	5.18	42062.7	17.45	7	6	100	95.2756	Confident
1162	1.05431		0.0252861			Glutamine synthetase (Q7T2P7_DANRE)	Q7T2P7	glula	NO		5.57	41585.8	22.1	17	9	100	95.2756	Confident
1162	1.05431		0.0252861			Glutamine synthetase (Q7M569_DANRE)	Q7M569	glula	NO		5.57	41550	22.1	17	9	100	95.2756	Confident
1167		-1.17431		0.010247		Glutamine synthetase (F1QCV3_DANRE)	F1QCV3	glulb	YES	GLUL	n.a.	n.a.	23.39	16	8	100	95.2756	Confident
1167		-1.17431		0.010247		Glutamine synthetase (Q7ZVF2_DANRE)	Q7ZVF2	glulb	YES	GLUL	5.98	41882.1	23.39	16	8	100	95.2756	Confident
1171	1.04974		0.0233467			Bactin2 protein (A8WG05_DANRE)	A8WG05	actb2	YES	ACTG1	5.3	41725.7	11.73	11	8	100	95.2756	Confident
1171	1.04974		0.0233467			Bactin2 protein (B2GTB1_DANRE)	B2GTB1	actb2	YES	ACTG1	5.3	41654.7	11.73	11	8	100	95.2756	Confident
1197					0.0200753	Creatine kinase, brain b (Q7ZU04_DANRE)	Q7ZU04	ckbb	YES	CKB	5.49	42888.4	43.57	40	25	100	95.2756	Confident
1197					0.0200753	Brain-subtype creatine kinase (Q8AY63_DANRE)	Q8AY63	ckbb	YES	CKB	5.49	42856.4	43.57	40	25	100	95.2756	Confident
1209					0.0269362	Creatine kinase, brain b (Q7ZU04_DANRE)	Q7ZU04	ckbb	YES	CKB	5.49	42888.4	43.57	40	25	100	95.2756	Confident
1209					0.0269362	Brain-subtype creatine kinase (Q8AY63_DANRE)	Q8AY63	ckbb	YES	CKB	5.49	42856.4	43.57	40	25	100	95.2756	Confident
1218					0.0248416	Creatine kinase, brain b (Q7ZU04_DANRE)	Q7ZU04	ckbb	YES	CKB	5.49	42888.4	43.57	40	25	100	95.2756	Confident
1218					0.0248416	Brain-subtype creatine kinase (Q8AY63_DANRE)	Q8AY63	ckbb	YES	CKB	5.49	42856.4	43.57	40	25	100	95.2756	Confident
1265		1.38809		0.000151879		Fructose-bisphosphate aldolase (B2GP30_DANRE)	B2GP30	aldocb	YES	ALDOC	6.21	39234.8	43.53	31	18	100	95.2756	Confident
1265		1.38809		0.000151879		Fructose-bisphosphate aldolase C-B (ALDCB_DANRE)	Q8JH70	aldocb	YES	ALDOC	6.2	39103.8	43.53	31	18	100	95.2756	Confident
1278		1.13257		0.0159269		Fructose-bisphosphate aldolase (B2GP30_DANRE)	B2GP30	aldocb	YES	ALDOC	6.21	39234.8	43.53	31	18	100	95.2756	Confident
1278		1.13257		0.0159269		Fructose-bisphosphate aldolase C-B (ALDCB_DANRE)	Q8JH70	aldocb	YES	ALDOC	6.2	39103.8	43.53	31	18	100	95.2756	Confident
1293	1.10858		0.0297644			Fructose-bisphosphate aldolase C-B (ALDCB_DANRE)	Q8JH70	aldocb	YES	ALDOC	6.2	39103.8	43.53	31	18	100	95.2756	Confident
1385		1.11562		0.0338095		Uncharacterized protein (F8W442_DANRE)	F8W442	gnao1a	YES	GNAO1	5.26	40234	36.44	23	16	100	95.2756	Confident
1385		1.11562		0.0338095		Guanine nucleotide binding protein (G protein), alpha activating activity polypeptide O (Q6PBP1_DANRE)	Q6PBP1	gnao1a	YES	GNAO1	5.24	39950.9	36.44	23	16	100	95.2756	Confident
1452	1.09362		0.0254379			L-lactate dehydrogenase B-A chain (LDHBA_DANRE)	Q9PVK4	ldhba	YES	LDHB	6.43	36093	23.65	10	7	100	95.2756	Confident
1532		1.08609		0.0399349		Uncharacterized protein (F1R6Y8_DANRE)	F1R6Y8	tubb4b	YES	TUBB4B	n.a.	n.a.	37.53	24	16	100	95.2756	Confident
1532		1.08609		0.0399349		Zgc:123194 (Q32PU7_DANRE)	Q32PU7	tubb2b	YES	TUBB2B	4.81	49684.9	31.91	22	15	100	95.2756	Confident
1532		1.08609		0.0399349		Uncharacterized protein (Q6PE34_DANRE)	Q6PE34	zgc:65894	YES	TUBB4A	4.81	49602.9	37.61	24	16	100	95.2756	Confident
1541		1.13671		0.00848919		Guanine nucleotide-binding protein G(I)/G(S)/G(T) subunit beta-1 (GBB1_DANRE)	Q6PH57	gnb1	YES	GNB1	5.6	37262	25.88	17	7	100	95.2756	Confident
1665					0.00928215	Bactin2 protein (A8WG05_DANRE)	A8WG05	actb2	YES	ACTG1	5.3	41725.7	11.73	11	8	100	95.2756	Confident
1665					0.00928215	Bactin2 protein (B2GTB1_DANRE)	B2GTB1	actb2	YES	ACTG1	5.3	41654.7	11.73	11	8	100	95.2756	Confident
1690		-1.17382		0.0078604		Uncharacterized protein (Q7ZV39_DANRE)	Q7ZV39	zgc:56235	YES	VDAC3	7.7	30026.3	24.2	10	7	100	95.2756	Confident
1775		-1.03673		0.0147375		Tyrosine 3-monooxygenase/tryptophan 5-monooxygenase activation protein, theta polypeptide a (Q7ZUM0_DANRE)	Q7ZUM0	ywhaqa	NO		4.65	27746.7	27.35	16	7	100	95.2756	Confident
1775		-1.03673		0.0147375		Tryosine 3-monooxygenase/tryptophan 5-monooxygenase activation protein, zeta polypeptide (Q803M8_DANRE)	Q803M8	ywhaqb	YES	YWHAQ	4.68	27785.7	38.37	14	8	100	95.2756	Confident
1824		-1.13397		0.0145757		PSMD8 (K7XMM6_DANRE)	K7XMM6	psmd8	YES	PSMD8	6.92	30923	15.73	5	4	100	95.2756	Confident
1824		-1.13397		0.0145757		Uncharacterized protein (Q6IQH4_DANRE)	Q6IQH4	psmd8	YES	PSMD8	6.47	30995.1	15.73	5	4	100	95.2756	Confident
2096	-1.22217		0.00917474			ATP synthase, H+ transporting, mitochondrial F0 complex, subunit d (Q6PC77_DANRE)	Q6PC77	atp5h	YES	ATP5H	7.83	18246.3	19.88	7	4	100	95.2756	Confident
2205		1.39658		0.00140228		Glutathione peroxidase (C3S171_DANRE)	C3S171	gpx4b	YES	GPX4	6.73	19207.5	26.47	6	4	100	95.2756	Confident
2205		1.39658		0.00140228		Glutathione peroxidase (Q503Y1_DANRE)	Q503Y1	gpx4b	YES	GPX4	7.81	12842.5	26.47	6	4	100	95.2756	Confident
2207		1.55507		0.000185281		Muscle cofilin 2 (Q6TH32_DANRE)	Q6TH32	cfl1	NO		6.84	18758.5	20	6	3	100	95.2756	Confident
2354		-1.35748		0.000488797		Hbaa1 protein (Q1JQ69_DANRE)	Q1JQ69	hbaa1	YES	HBZ	7.97	15512.2	13.99	3	2	100	95.2756	Confident
2354		-1.35748		0.000488797		Novel alpha-globin (Q7SZV9_DANRE)	Q7SZV9	hbaa1	YES	HBZ	8.81	15514.2	13.99	3	2	100	95.2756	Confident
2354		-1.35748		0.000488797		Hbaa1 protein (Q803Z5_DANRE)	Q803Z5	hbaa1	YES	HBZ	7.97	15498.2	13.99	3	2	100	95.2756	Confident
2354		-1.35748		0.000488797		Hemoglobin subunit alpha (HBA_DANRE)	Q90487	hbaa1	YES	HBZ	7.95	15381.2	13.99	3	2	100	95.2756	Confident
2428		-1.1923		0.00611194		Uncharacterized protein (F8W3N3_DANRE)	F8W3N3	fabp7a	NO		5.38	13477.8	39.39	6	6	100	95.2756	Confident
2428		-1.1923		0.00611194		Brain-type fatty acid binding protein (Q9I8N9_DANRE)	Q9I8N9	fabp7a	NO		5.43	14908.5	39.39	6	6	100	95.2756	Confident
2466		-1.15009		0.00907703		Fatty acid binding protein 3, muscle and heart (Q8UVG7_DANRE)	Q8UVG7	fabp3	YES	FABP3	5.71	14872.7	29.32	12	6	100	95.2756	Confident

## Sheet: Supplementary Table2A
Ingenuity Canonical Pathways	Analysis Name	p-Val	-log(p-value)	Ratio	Molecule Count	Molecules
Oxidative Phosphorylation	Hg	5.01187e-05	4.3	0.0275	3	SDHA,ATP5H,ATP5A1
Oxidative Phosphorylation	Se	0.124165	0.906	0.00917	1	SDHA
Oxidative Phosphorylation	Se x Hg	7.94328e-06	5.1	0.0275	3	NDUFS1,ATP5A1,NDUFS2
Glycolysis I	Hg	0.000125893	3.9	0.08	2	ENO1,ALDOC
Glycolysis I	Se	0.000416869	3.38	0.08	2	GPI,ALDOC
Gluconeogenesis I	Hg	0.000125893	3.9	0.08	2	ENO1,ALDOC
Gluconeogenesis I	Se	0.000416869	3.38	0.08	2	GPI,ALDOC
Mitochondrial Dysfunction	Hg	0.000190546	3.72	0.0175	3	SDHA,ATP5H,ATP5A1
Mitochondrial Dysfunction	Se	0.00112202	2.95	0.0175	3	SDHA,GPX4,VDAC3
Mitochondrial Dysfunction	Se x Hg	3.01995e-05	4.52	0.0175	3	NDUFS1,ATP5A1,NDUFS2
phagosome maturation	Hg	0.00295121	2.53	0.0167	2	ATP6V1B2,ATP6V1B1
phagosome maturation	Se	2.95121e-07	6.53	0.0417	5	TUBB4B,TUBB4A,ATP6V1A,ATP6V1B2,TUBB2B
phagosome maturation	Se x Hg	0.0457088	1.34	0.00833	1	ATP6V1B1
Pyruvate Fermentation to Lactate	Hg	0.0040738	2.39	0.167	1	LDHB
Aldosterone Signaling in Epithelial Cells	Hg	0.00467735	2.33	0.0132	2	HSPA9,HSPD1
Sucrose Degradation V (Mammalian)	Hg	0.0060256	2.22	0.111	1	ALDOC
Sucrose Degradation V (Mammalian)	Se	0.0109648	1.96	0.111	1	ALDOC
Huntington's Disease Signaling	Hg	0.0102329	1.99	0.00873	2	SDHA,HSPA9
Huntington's Disease Signaling	Se	0.030903	1.51	0.00873	2	SDHA,GNB1
Protein Ubiquitination Pathway	Hg	0.0125893	1.9	0.00784	2	HSPA9,HSPD1
Protein Ubiquitination Pathway	Se	0.0380189	1.42	0.00784	2	PSMC2,PSMD8
TCA Cycle II (Eukaryotic)	Hg	0.0154882	1.81	0.0435	1	SDHA
TCA Cycle II (Eukaryotic)	Se	0.0275423	1.56	0.0435	1	SDHA
Mechanisms of Viral Exit from Host Cells	Hg	0.0275423	1.56	0.0244	1	ACTG1
Mechanisms of Viral Exit from Host Cells	Se x Hg	0.0158489	1.8	0.0244	1	ACTG1
MSP-RON Signaling Pathway	Hg	0.030903	1.51	0.0217	1	ACTG1
MSP-RON Signaling Pathway	Se x Hg	0.0177828	1.75	0.0217	1	ACTG1
Unfolded protein response	Hg	0.0363078	1.44	0.0185	1	HSPA9
Remodeling of Epithelial Adherens Junctions	Hg	0.0457088	1.34	0.0147	1	ACTG1
Remodeling of Epithelial Adherens Junctions	Se	7.4131e-05	4.13	0.0441	3	TUBB4B,TUBB4A,TUBB2B
Remodeling of Epithelial Adherens Junctions	Se x Hg	0.0263027	1.58	0.0147	1	ACTG1
Agrin Interactions at Neuromuscular Junction	Hg	0.0457088	1.34	0.0145	1	ACTG1
Agrin Interactions at Neuromuscular Junction	Se x Hg	0.0263027	1.58	0.0145	1	ACTG1
Caveolar-mediated Endocytosis Signaling	Hg	0.0467735	1.33	0.0141	1	ACTG1
Caveolar-mediated Endocytosis Signaling	Se x Hg	0.0269153	1.57	0.0141	1	ACTG1
TR/RXR Activation	Hg	0.0562341	1.25	0.0118	1	ENO1
FAK Signaling	Hg	0.057544	1.24	0.0115	1	ACTG1
FAK Signaling	Se x Hg	0.0331131	1.48	0.0115	1	ACTG1
Virus Entry via Endocytic Pathways	Hg	0.0588844	1.23	0.0112	1	ACTG1
Virus Entry via Endocytic Pathways	Se x Hg	0.0338844	1.47	0.0112	1	ACTG1
Crosstalk between Dendritic Cells and Natural Killer Cells	Hg	0.0588844	1.23	0.0112	1	ACTG1
Crosstalk between Dendritic Cells and Natural Killer Cells	Se x Hg	0.0338844	1.47	0.0112	1	ACTG1
Death Receptor Signaling	Hg	0.060256	1.22	0.0109	1	ACTG1
Death Receptor Signaling	Se x Hg	0.0354813	1.45	0.0109	1	ACTG1
VEGF Signaling	Hg	0.060256	1.22	0.0109	1	ACTG1
VEGF Signaling	Se x Hg	0.0354813	1.45	0.0109	1	ACTG1
Fcγ Receptor-mediated Phagocytosis in Macrophages and Monocytes	Hg	0.0616595	1.21	0.0108	1	ACTG1
Fcγ Receptor-mediated Phagocytosis in Macrophages and Monocytes	Se x Hg	0.0354813	1.45	0.0108	1	ACTG1
Paxillin Signaling	Hg	0.0660693	1.18	0.0099	1	ACTG1
Paxillin Signaling	Se x Hg	0.0389045	1.41	0.0099	1	ACTG1
HIF1α Signaling	Hg	0.0676083	1.17	0.0098	1	LDHB
Type I Diabetes Mellitus Signaling	Hg	0.0724436	1.14	0.00909	1	HSPD1
RhoA Signaling	Hg	0.0794328	1.1	0.0082	1	ACTG1
RhoA Signaling	Se	0.138038	0.86	0.0082	1	SEPT6
RhoA Signaling	Se x Hg	0.0467735	1.33	0.0082	1	ACTG1
Cellular Effects of Sildenafil (Viagra)	Hg	0.0831764	1.08	0.00775	1	ACTG1
Cellular Effects of Sildenafil (Viagra)	Se x Hg	0.0489779	1.31	0.00775	1	ACTG1
eNOS Signaling	Hg	0.0912011	1.04	0.00704	1	HSPA9
Epithelial Adherens Junction Signaling	Hg	0.0954993	1.02	0.00685	1	ACTG1
Epithelial Adherens Junction Signaling	Se	0.000707946	3.15	0.0205	3	TUBB4B,TUBB4A,TUBB2B
Epithelial Adherens Junction Signaling	Se x Hg	0.0549541	1.26	0.00685	1	ACTG1
Gap Junction Signaling	Hg	0.100231	0.999	0.00645	1	ACTG1
Gap Junction Signaling	Se	0.000851138	3.07	0.0194	3	TUBB4B,TUBB4A,TUBB2B
Gap Junction Signaling	Se x Hg	0.0588844	1.23	0.00645	1	ACTG1
Tec Kinase Signaling	Hg	0.101391	0.994	0.00637	1	ACTG1
Tec Kinase Signaling	Se	0.0154882	1.81	0.0127	2	GNB1,GNAO1
Tec Kinase Signaling	Se x Hg	0.0588844	1.23	0.00637	1	ACTG1
Germ Cell-Sertoli Cell Junction Signaling	Hg	0.103276	0.986	0.00625	1	ACTG1
Germ Cell-Sertoli Cell Junction Signaling	Se	0.000933254	3.03	0.0188	3	TUBB4B,TUBB4A,TUBB2B
Germ Cell-Sertoli Cell Junction Signaling	Se x Hg	0.060256	1.22	0.00625	1	ACTG1
Tight Junction Signaling	Hg	0.107647	0.968	0.00599	1	ACTG1
Tight Junction Signaling	Se x Hg	0.0630957	1.2	0.00599	1	ACTG1
RhoGDI Signaling	Hg	0.111173	0.954	0.00578	1	ACTG1
RhoGDI Signaling	Se	0.0186209	1.73	0.0116	2	GNB1,GNAO1
RhoGDI Signaling	Se x Hg	0.0645654	1.19	0.00578	1	ACTG1
Sertoli Cell-Sertoli Cell Junction Signaling	Hg	0.114288	0.942	0.00562	1	ACTG1
Sertoli Cell-Sertoli Cell Junction Signaling	Se	0.00125893	2.9	0.0169	3	TUBB4B,TUBB4A,TUBB2B
Sertoli Cell-Sertoli Cell Junction Signaling	Se x Hg	0.0676083	1.17	0.00562	1	ACTG1
NRF2-mediated Oxidative Stress Response	Hg	0.115611	0.937	0.00556	1	ACTG1
NRF2-mediated Oxidative Stress Response	Se x Hg	0.0676083	1.17	0.00556	1	ACTG1
Clathrin-mediated Endocytosis Signaling	Hg	0.118577	0.926	0.00541	1	ACTG1
Clathrin-mediated Endocytosis Signaling	Se x Hg	0.0691831	1.16	0.00541	1	ACTG1
ILK Signaling	Hg	0.118577	0.926	0.00541	1	ACTG1
ILK Signaling	Se	0.201837	0.695	0.00541	1	VIM
ILK Signaling	Se x Hg	0.0691831	1.16	0.00541	1	ACTG1
Agranulocyte Adhesion and Diapedesis	Hg	0.12106	0.917	0.00529	1	ACTG1
Agranulocyte Adhesion and Diapedesis	Se x Hg	0.0707946	1.15	0.00529	1	ACTG1
Leukocyte Extravasation Signaling	Hg	0.126474	0.898	0.00505	1	ACTG1
Leukocyte Extravasation Signaling	Se x Hg	0.074131	1.13	0.00505	1	ACTG1
Integrin Signaling	Hg	0.131826	0.88	0.00483	1	ACTG1
Integrin Signaling	Se x Hg	0.0776247	1.11	0.00483	1	ACTG1
Actin Cytoskeleton Signaling	Hg	0.137088	0.863	0.00463	1	ACTG1
Actin Cytoskeleton Signaling	Se x Hg	0.0812831	1.09	0.00463	1	ACTG1
Signaling by Rho Family GTPases	Hg	0.147571	0.831	0.00427	1	ACTG1
Signaling by Rho Family GTPases	Se	0.000169824	3.77	0.0171	4	GNB1,GNAO1,VIM,SEPT6
Signaling by Rho Family GTPases	Se x Hg	0.0870964	1.06	0.00427	1	ACTG1
Glucocorticoid Receptor Signaling	Hg	0.171396	0.766	0.00364	1	HSPA9
Axonal Guidance Signaling	Se	0.000151356	3.82	0.0115	5	GNB1,TUBB4B,GNAO1,TUBB4A,TUBB2B
Amyotrophic Lateral Sclerosis Signaling	Se	0.112202	0.95	0.0102	1	GLUL
Synaptic Long Term Depression	Se	0.158855	0.799	0.00704	1	GNAO1
Aryl Hydrocarbon Receptor Signaling	Se	0.156675	0.805	0.00714	1	ALDH7A1
Aryl Hydrocarbon Receptor Signaling	Se x Hg	0.0524807	1.28	0.00714	1	ALDH7A1
LPS/IL-1 Mediated Inhibition of RXR Function	Se	0.0288403	1.54	0.00909	2	FABP3,ALDH7A1
LPS/IL-1 Mediated Inhibition of RXR Function	Se x Hg	0.0812831	1.09	0.00455	1	ALDH7A1
14-3-3-mediated Signaling	Se	2.63027e-07	6.58	0.0427	5	YWHAQ,TUBB4B,VIM,TUBB4A,TUBB2B
α-Adrenergic Signaling	Se	0.100231	0.999	0.0115	1	GNB1
IL-8 Signaling	Se	0.200909	0.697	0.00543	1	GNB1
Role of NFAT in Regulation of the Immune Response	Se	0.018197	1.74	0.0117	2	GNB1,GNAO1
CCR5 Signaling in Macrophages	Se	0.0812831	1.09	0.0145	1	GNB1
fMLP Signaling in Neutrophils	Se	0.123027	0.91	0.00926	1	GNB1
CXCR4 Signaling	Se	0.0144544	1.84	0.0132	2	GNB1,GNAO1
CCR3 Signaling in Eosinophils	Se	0.132739	0.877	0.00855	1	GNB1
Melatonin Signaling	Se	0.0812831	1.09	0.0143	1	GNAO1
Endothelin-1 Signaling	Se	0.188799	0.724	0.00581	1	GNAO1
Relaxin Signaling	Se	0.0114815	1.94	0.0148	2	GNB1,GNAO1
Semaphorin Signaling in Neurons	Se	0.0616595	1.21	0.0189	1	DPYSL3
Thrombin Signaling	Se	0.0218776	1.66	0.0105	2	GNB1,GNAO1
Cardiac Hypertrophy Signaling	Se	0.0295121	1.53	0.00897	2	GNB1,GNAO1
Molecular Mechanisms of Cancer	Se	0.360579	0.443	0.00274	1	GNAO1
Corticotropin Releasing Hormone Signaling	Se	0.126183	0.899	0.00901	1	GNAO1
Antiproliferative Role of Somatostatin Receptor 2	Se	0.074131	1.13	0.0159	1	GNB1
Androgen Signaling	Se	0.00794328	2.1	0.018	2	GNB1,GNAO1
CREB Signaling in Neurons	Se	0.018197	1.74	0.0117	2	GNB1,GNAO1
p70S6K Signaling	Se	0.134896	0.87	0.0084	1	YWHAQ
ERK5 Signaling	Se	0.074131	1.13	0.0159	1	YWHAQ
Colorectal Cancer Metastasis Signaling	Se	0.250035	0.602	0.00424	1	GNB1
Myc Mediated Apoptosis Signaling	Se	0.0676083	1.17	0.0172	1	YWHAQ
G Beta Gamma Signaling	Se	0.00501187	2.3	0.0227	2	GNB1,GNAO1
G Protein Signaling Mediated by Tubby	Se	0.0380189	1.42	0.0312	1	GNB1
AMPK Signaling	Se x Hg	0.0676083	1.17	0.00562	1	PPM1A
Phospholipase C Signaling	Se	0.251189	0.6	0.00422	1	GNB1
Protein Kinase A Signaling	Se	0.0794328	1.1	0.00518	2	YWHAQ,GNB1
Role of Macrophages, Fibroblasts and Endothelial Cells in Rheumatoid Arthritis	Se	0.303389	0.518	0.00338	1	GNAO1
Role of NFAT in Cardiac Hypertrophy	Se	0.195884	0.708	0.00559	1	GNB1
IL-1 Signaling	Se	0.00537032	2.27	0.022	2	GNB1,GNAO1
Breast Cancer Regulation by Stathmin1	Se	7.76247e-05	4.11	0.0209	4	GNB1,TUBB4B,TUBB4A,TUBB2B
P2Y Purigenic Receptor Signaling Pathway	Se	0.134896	0.87	0.0084	1	GNB1
Ephrin B Signaling	Se	0.00354813	2.45	0.0274	2	GNB1,GNAO1
Dopamine Degradation	Se	0.0331131	1.48	0.0357	1	ALDH7A1
Dopamine Degradation	Se x Hg	0.0107152	1.97	0.0357	1	ALDH7A1
Glutathione Redox Reactions I	Se	0.0229087	1.64	0.0526	1	GPX4
Creatine-phosphate Biosynthesis	Se x Hg	0.00194984	2.71	0.2	1	CKB
Tryptophan Degradation X (Mammalian, via Tryptamine)	Se	0.0275423	1.56	0.0435	1	ALDH7A1
Tryptophan Degradation X (Mammalian, via Tryptamine)	Se x Hg	0.00891251	2.05	0.0435	1	ALDH7A1
Choline Degradation I	Se	0.00239883	2.62	0.5	1	ALDH7A1
Choline Degradation I	Se x Hg	0.000776247	3.11	0.5	1	ALDH7A1
Glutamine Biosynthesis I	Se	0.00120226	2.92	1	1	GLUL
Lysine Degradation II	Se	0.0060256	2.22	0.2	1	ALDH7A1
Lysine Degradation II	Se x Hg	0.00194984	2.71	0.2	1	ALDH7A1
Serotonin Degradation	Se	0.0776247	1.11	0.0149	1	ALDH7A1
Serotonin Degradation	Se x Hg	0.025704	1.59	0.0149	1	ALDH7A1
Colanic Acid Building Blocks Biosynthesis	Se	0.0169824	1.77	0.0714	1	GPI
Lysine Degradation V	Se	0.0060256	2.22	0.2	1	ALDH7A1
Lysine Degradation V	Se x Hg	0.00194984	2.71	0.2	1	ALDH7A1
Histamine Degradation	Se	0.0204174	1.69	0.0588	1	ALDH7A1
Histamine Degradation	Se x Hg	0.00660693	2.18	0.0588	1	ALDH7A1
Noradrenaline and Adrenaline Degradation	Se	0.0446684	1.35	0.0263	1	ALDH7A1
Noradrenaline and Adrenaline Degradation	Se x Hg	0.0147911	1.83	0.0263	1	ALDH7A1
Putrescine Degradation III	Se	0.0251189	1.6	0.0476	1	ALDH7A1
Putrescine Degradation III	Se x Hg	0.00812831	2.09	0.0476	1	ALDH7A1
Fatty Acid α-oxidation	Se	0.0239883	1.62	0.05	1	ALDH7A1
Fatty Acid α-oxidation	Se x Hg	0.00776247	2.11	0.05	1	ALDH7A1
UDP-N-acetyl-D-galactosamine Biosynthesis II	Se	0.0109648	1.96	0.111	1	GPI
Oxidative Ethanol Degradation III	Se	0.0229087	1.64	0.0526	1	ALDH7A1
Oxidative Ethanol Degradation III	Se x Hg	0.0074131	2.13	0.0526	1	ALDH7A1
Ethanol Degradation IV	Se	0.0275423	1.56	0.0435	1	ALDH7A1
Ethanol Degradation IV	Se x Hg	0.00891251	2.05	0.0435	1	ALDH7A1
Ethanol Degradation II	Se	0.0416869	1.38	0.0286	1	ALDH7A1
Ethanol Degradation II	Se x Hg	0.0134896	1.87	0.0286	1	ALDH7A1
GDP-mannose Biosynthesis	Se	0.00724436	2.14	0.167	1	GPI
Gαi Signaling	Se	0.135831	0.867	0.00833	1	GNB1
Gαq Signaling	Se	0.163682	0.786	0.0068	1	GNB1
Gαs Signaling	Se	0.124165	0.906	0.00917	1	GNB1
HIPPO signaling	Se	0.1	1	0.0116	1	YWHAQ
ERK/MAPK Signaling	Se	0.203704	0.691	0.00535	1	YWHAQ
SAPK/JNK Signaling	Se	0.107895	0.967	0.0106	1	GNB1
PI3K/AKT Signaling	Se	0.138995	0.857	0.00813	1	YWHAQ
Cardiac β-adrenergic Signaling	Se	0.149279	0.826	0.00752	1	GNB1
Cell Cycle: G2/M DNA Damage Checkpoint Regulation	Se	0.057544	1.24	0.0204	1	YWHAQ
Xenobiotic Metabolism Signaling	Se	0.282488	0.549	0.00368	1	ALDH7A1
Xenobiotic Metabolism Signaling	Se x Hg	0.100693	0.997	0.00368	1	ALDH7A1
Wnt/β-catenin Signaling	Se	0.186209	0.73	0.00592	1	GNAO1
Phototransduction Pathway	Se	0.0616595	1.21	0.0189	1	GNB1
IGF-1 Signaling	Se	0.111173	0.954	0.0103	1	YWHAQ
cAMP-mediated signaling	Se	0.234423	0.63	0.00457	1	GNAO1
Glutamate Receptor Signaling	Se	0.00213796	2.67	0.0351	2	GNB1,GLUL
G-Protein Coupled Receptor Signaling	Se	0.268534	0.571	0.00391	1	GNAO1
Gustation Pathway	Se	0.136773	0.864	0.00826	1	GNB1
Ephrin Receptor Signaling	Se	0.0186209	1.73	0.0115	2	GNB1,GNAO1

## Sheet: Supplementary Table2B
Category	AnalysisName	p-ValRange	p-ValMin	p-ValMax	ScoreMin	ScoreMax	Molecule Count	Molecules
Cell Death and Survival	Hg	2.44E-07-3.74E-02	2.44e-07	0.0374	6.61261	1.42713	9	SDHA,ENO1,STXBP1,ATP5A1,HSPA9,CCT5,HSPD1,CCT8,ALDOC
Cell Death and Survival	Se	1.21E-03-4.57E-02	0.00121	0.0457	2.91721	1.34008	12	SDHA,YWHAQ,GPI,STXBP1,HBZ,DPYSL3,GNAO1,TRAP1,VIM,GPX4,FABP3,ALDOC
Cell Death and Survival	Se x Hg	2.53E-02-3.81E-02	0.0253	0.0381	1.59688	1.41908	1	PPM1A
Nucleic Acid Metabolism	Hg	1.35E-04-2.71E-03	0.000135	0.00271	3.86967	2.56703	4	ATP5H,ATP5A1,CCT5,HSPD1
Nucleic Acid Metabolism	Se	5.55E-04-8.45E-03	0.000555	0.00845	3.25571	2.07314	4	GNB1,GNAO1,PSMC2,VDAC3
Nucleic Acid Metabolism	Se x Hg	1.02E-04-4.97E-02	0.000102	0.0497	3.9914	1.30364	2	NDUFS1,ATP5A1
Small Molecule Biochemistry	Hg	1.35E-04-8.12E-03	0.000135	0.00812	3.86967	2.09044	8	SDHA,STXBP1,ATP5H,ATP5A1,CCT5,HSPD1,ATP6V1B2,ALDOC
Small Molecule Biochemistry	Se	5.55E-04-3.81E-02	0.000555	0.0381	3.25571	1.41908	14	SDHA,STXBP1,VIM,VDAC3,GNB1,GPI,GNAO1,GLUL,FABP3,GPX4,PSMC2,SYN1,ATP6V1B2,ALDOC
Small Molecule Biochemistry	Se x Hg	1.02E-04-4.97E-02	0.000102	0.0497	3.9914	1.30364	3	CKB,NDUFS1,ATP5A1
Cellular Assembly and Organization	Hg	2.81E-04-3.8E-02	0.000281	0.038	3.55129	1.42022	4	STXBP1,CCT5,ACTG1,CCT8
Cellular Assembly and Organization	Se	2.94E-04-4.74E-02	0.000294	0.0474	3.53165	1.32422	10	GNB1,GPI,STXBP1,DPYSL3,GNAO1,VIM,TUBB4A,GPX4,VDAC3,SYN1
Cellular Assembly and Organization	Se x Hg	1.55E-03-4.11E-02	0.00155	0.0411	2.80967	1.38616	3	CKB,NDUFS1,ACTG1
Energy Production	Hg	3.29E-04-2.71E-03	0.000329	0.00271	3.4828	2.56703	4	ATP5H,ATP5A1,CCT5,HSPD1
Energy Production	Se x Hg	1.02E-04-4.97E-02	0.000102	0.0497	3.9914	1.30364	2	NDUFS1,ATP5A1
Cell-To-Cell Signaling and Interaction	Hg	3.98E-04-4.65E-02	0.000398	0.0465	3.40012	1.33255	5	STXBP1,CCT5,HSPD1,ACTG1,CCT8
Cell-To-Cell Signaling and Interaction	Se	1.14E-03-4.16E-02	0.00114	0.0416	2.9431	1.38091	10	GNB1,GPI,STXBP1,GNAO1,GLUL,VIM,FABP3,PSMC2,VDAC3,SYN1
Cell-To-Cell Signaling and Interaction	Se x Hg	8.12E-03-3.02E-02	0.00812	0.0302	2.09044	1.51999	2	CKB,ACTG1
Reproductive System Development and Function	Hg	3.98E-04-3.98E-04	0.000398	0.000398	3.40012	3.40012	2	CCT5,CCT8
Reproductive System Development and Function	Se	3.21E-04-1.8E-02	0.000321	0.018	3.49349	1.74473	4	TUBB4B,GNAO1,GPX4,VDAC3
Molecular Transport	Hg	4.54E-04-2.22E-02	0.000454	0.0222	3.34294	1.65365	4	STXBP1,HSPA9,ATP6V1B2,ATP6V1B1
Molecular Transport	Se	1.14E-03-4.16E-02	0.00114	0.0416	2.9431	1.38091	10	STXBP1,GPI,GNAO1,VIM,GLUL,FABP3,VDAC3,ATP6V1A,SYN1,ATP6V1B2
Molecular Transport	Se x Hg	1.16E-03-4.97E-02	0.00116	0.0497	2.93554	1.30364	2	NDUFS1,ATP6V1B1
DNA Replication, Recombination, and Repair	Hg	4.74E-04-3.74E-02	0.000474	0.0374	3.32422	1.42713	3	ENO1,CCT5,HSPD1
DNA Replication, Recombination, and Repair	Se	5.55E-04-3.22E-02	0.000555	0.0322	3.25571	1.49214	8	GNB1,GNAO1,VIM,TUBB4A,GPX4,VDAC3,PSMC2,SYN1
Cellular Compromise	Hg	5.56E-04-4.13E-02	0.000556	0.0413	3.25493	1.38405	4	SDHA,STXBP1,HSPA9,ATP6V1B2
Cellular Compromise	Se	1.4E-04-2.87E-02	0.00014	0.0287	3.85387	1.54212	11	GNB1,GPI,STXBP1,HBZ,DPYSL3,VIM,TUBB4A,GPX4,FABP3,SEPT6,ATP6V1B2
Auditory Disease	Hg	6.79E-04-6.79E-04	0.000679	0.000679	3.16813	3.16813	1	ACTG1
Auditory Disease	Se x Hg	3.88E-04-3.88E-04	0.000388	0.000388	3.41117	3.41117	1	ACTG1
Cancer	Hg	6.79E-04-4.98E-02	0.000679	0.0498	3.16813	1.30277	10	SDHA,ENO1,STXBP1,ATP5A1,CCT5,HSPD1,ACTG1,ATP6V1B1,ATP6V1B2,ALDOC
Cancer	Se	3.96E-05-4.74E-02	3.96e-05	0.0474	4.4023	1.32422	19	SDHA,STXBP1,TUBB4B,VIM,ATP6V1A,VDAC3,TUBB2B,GNB1,YWHAQ,GPI,GNAO1,GLUL,TUBB4A,FABP3,SYN1,SEPT6,ATP6V1B2,ALDH7A1,ALDOC
Cancer	Se x Hg	3.88E-04-4.52E-02	0.000388	0.0452	3.41117	1.34486	7	CKB,NDUFS1,ATP5A1,NDUFS2,ACTG1,ATP6V1B1,ALDH7A1
Cellular Function and Maintenance	Hg	6.79E-04-4.78E-02	0.000679	0.0478	3.16813	1.32057	6	STXBP1,HSPA9,HSPD1,ACTG1,ATP6V1B1,ATP6V1B2
Cellular Function and Maintenance	Se	1.21E-03-4.04E-02	0.00121	0.0404	2.91721	1.39362	13	STXBP1,DPYSL3,VIM,VDAC3,GNB1,YWHAQ,GPI,HBZ,GNAO1,TUBB4A,GPX4,SYN1,ATP6V1B2
Cellular Function and Maintenance	Se x Hg	3.1E-03-4.21E-02	0.0031	0.0421	2.50864	1.37572	4	CKB,NDUFS1,ACTG1,ATP6V1B1
Cellular Growth and Proliferation	Hg	6.79E-04-2.95E-02	0.000679	0.0295	3.16813	1.53018	4	ENO1,HSPA9,HSPD1,ACTG1
Cellular Growth and Proliferation	Se	1.11E-03-3.69E-02	0.00111	0.0369	2.95468	1.43297	14	TUBB4B,DPYSL3,TRAP1,VIM,GNB1,YWHAQ,GPI,GNAO1,GLUL,GPX4,FABP3,PSMC2,SYN1,SEPT6
Cellular Growth and Proliferation	Se x Hg	1.69E-02-1.69E-02	0.0169	0.0169	1.77211	1.77211	1	ACTG1
Developmental Disorder	Hg	6.79E-04-1.68E-02	0.000679	0.0168	3.16813	1.77469	5	SDHA,ATP5A1,ACTG1,LDHB,ALDOC
Developmental Disorder	Se	7.73E-04-4.51E-02	0.000773	0.0451	3.11182	1.34582	10	SDHA,GPI,TUBB4B,VIM,GLUL,TUBB4A,GPX4,SYN1,ALDOC,TUBB2B
Developmental Disorder	Se x Hg	1.58E-06-5.03E-03	1.58e-06	0.00503	5.80134	2.29843	4	NDUFS1,ATP5A1,NDUFS2,ACTG1
Endocrine System Disorders	Hg	6.79E-04-3.67E-02	0.000679	0.0367	3.16813	1.43533	8	SDHA,ENO1,CCT5,HSPD1,ACTG1,ATP6V1B1,ATP6V1B2,ALDOC
Endocrine System Disorders	Se	3.96E-05-4.35E-02	3.96e-05	0.0435	4.4023	1.36151	9	SDHA,GPI,TUBB4B,VIM,TUBB4A,GPX4,ATP6V1A,ATP6V1B2,ALDOC
Endocrine System Disorders	Se x Hg	2.83E-02-3.78E-02	0.0283	0.0378	1.54821	1.42251	2	CKB,ATP6V1B1
Hematological System Development and Function	Hg	6.79E-04-3.67E-02	0.000679	0.0367	3.16813	1.43533	4	STXBP1,HSPA9,HSPD1,ACTG1
Hematological System Development and Function	Se	1.68E-02-3.69E-02	0.0168	0.0369	1.77469	1.43297	2	HBZ,GNAO1
Hematopoiesis	Hg	6.79E-04-1.95E-02	0.000679	0.0195	3.16813	1.70997	2	HSPA9,HSPD1
Hematopoiesis	Se	3.69E-02-3.69E-02	0.0369	0.0369	1.43297	1.43297	1	HBZ
Hereditary Disorder	Hg	6.79E-04-2.15E-02	0.000679	0.0215	3.16813	1.66756	10	SDHA,STXBP1,ATP5A1,CCT5,HSPD1,ACTG1,ATP6V1B2,LDHB,ATP6V1B1,ALDOC
Hereditary Disorder	Se	1.75E-06-4.51E-02	1.75e-06	0.0451	5.75696	1.34582	17	SDHA,STXBP1,TUBB4B,DPYSL3,VIM,ATP6V1A,GNB1,GPI,GNAO1,GLUL,TUBB4A,GPX4,SEPT6,SYN1,ATP6V1B2,ALDH7A1,ALDOC
Hereditary Disorder	Se x Hg	1.58E-06-3.16E-02	1.58e-06	0.0316	5.80134	1.50031	7	CKB,NDUFS1,ATP5A1,NDUFS2,ACTG1,ATP6V1B1,ALDH7A1
Metabolic Disease	Hg	6.79E-04-2.15E-02	0.000679	0.0215	3.16813	1.66756	6	SDHA,ATP5A1,HSPA9,HSPD1,LDHB,ATP6V1B1
Metabolic Disease	Se	7.73E-04-3.81E-02	0.000773	0.0381	3.11182	1.41908	5	SDHA,TUBB4B,GLUL,VIM,TUBB4A
Metabolic Disease	Se x Hg	1.58E-06-5.03E-03	1.58e-06	0.00503	5.80134	2.29843	4	NDUFS1,ATP5A1,NDUFS2,ATP6V1B1
Neurological Disease	Hg	6.79E-04-3.67E-02	0.000679	0.0367	3.16813	1.43533	9	SDHA,STXBP1,ATP5A1,HSPA9,CCT5,HSPD1,ACTG1,LDHB,ATP6V1B2
Neurological Disease	Se	2.97E-11-4.51E-02	2.97e-11	0.0451	10.5272	1.34582	18	SDHA,STXBP1,TUBB4B,DPYSL3,VIM,ATP6V1A,TUBB2B,YWHAQ,GNB1,GPI,GNAO1,TUBB4A,FABP3,SEPT6,SYN1,ATP6V1B2,ALDH7A1,ALDOC
Neurological Disease	Se x Hg	3.88E-04-3.16E-02	0.000388	0.0316	3.41117	1.50031	6	CKB,NDUFS1,ATP5A1,NDUFS2,ACTG1,ALDH7A1
Ophthalmic Disease	Hg	6.79E-04-5.42E-03	0.000679	0.00542	3.16813	2.266	2	HSPD1,ACTG1
Ophthalmic Disease	Se	1.67E-04-4.63E-03	0.000167	0.00463	3.77728	2.33442	4	GNB1,TUBB4B,TUBB4A,GPX4
Ophthalmic Disease	Se x Hg	3.88E-04-3.88E-04	0.000388	0.000388	3.41117	3.41117	1	ACTG1
Organismal Injury and Abnormalities	Hg	6.79E-04-4.98E-02	0.000679	0.0498	3.16813	1.30277	11	SDHA,ENO1,STXBP1,ATP5A1,CCT5,HSPD1,ACTG1,LDHB,ATP6V1B1,ATP6V1B2,ALDOC
Organismal Injury and Abnormalities	Se	1.75E-06-4.74E-02	1.75e-06	0.0474	5.75696	1.32422	22	SDHA,STXBP1,DPYSL3,TUBB4B,VIM,VDAC3,ATP6V1A,TUBB2B,GNB1,YWHAQ,GPI,HBZ,GNAO1,GLUL,TUBB4A,FABP3,GPX4,SYN1,SEPT6,ATP6V1B2,ALDH7A1,ALDOC
Organismal Injury and Abnormalities	Se x Hg	1.58E-06-4.52E-02	1.58e-06	0.0452	5.80134	1.34486	7	CKB,NDUFS1,ATP5A1,NDUFS2,ACTG1,ATP6V1B1,ALDH7A1
Psychological Disorders	Hg	6.79E-04-1.27E-02	0.000679	0.0127	3.16813	1.8962	6	SDHA,ATP5A1,HSPA9,HSPD1,LDHB,ATP6V1B2
Psychological Disorders	Se	2.97E-11-2.2E-02	2.97e-11	0.022	10.5272	1.65758	14	SDHA,TUBB4B,DPYSL3,VIM,ATP6V1A,TUBB2B,GNB1,GPI,GNAO1,TUBB4A,GPX4,SEPT6,SYN1,ATP6V1B2
Psychological Disorders	Se x Hg	3.87E-03-3.16E-02	0.00387	0.0316	2.41229	1.50031	4	CKB,NDUFS1,ATP5A1,NDUFS2
Renal and Urological Disease	Hg	6.79E-04-3.39E-03	0.000679	0.00339	3.16813	2.4698	1	ATP6V1B1
Renal and Urological Disease	Se	1.27E-04-4.43E-02	0.000127	0.0443	3.8962	1.3536	2	TUBB4B,TUBB4A
Renal and Urological Disease	Se x Hg	3.88E-04-1.94E-03	0.000388	0.00194	3.41117	2.7122	1	ATP6V1B1
Reproductive System Disease	Hg	1.12E-03-4.81E-02	0.00112	0.0481	2.95078	1.31785	10	SDHA,ENO1,STXBP1,ATP5A1,CCT5,HSPD1,ACTG1,ATP6V1B1,ATP6V1B2,ALDOC
Reproductive System Disease	Se	1.27E-04-3.75E-02	0.000127	0.0375	3.8962	1.42597	18	SDHA,STXBP1,DPYSL3,TUBB4B,VIM,VDAC3,ATP6V1A,TUBB2B,YWHAQ,GNAO1,GLUL,TUBB4A,GPX4,SEPT6,SYN1,ATP6V1B2,ALDOC,ALDH7A1
Reproductive System Disease	Se x Hg	3.88E-04-4.52E-02	0.000388	0.0452	3.41117	1.34486	6	CKB,NDUFS1,NDUFS2,ACTG1,ATP6V1B1,ALDH7A1
Cellular Response to Therapeutics	Hg	1.36E-03-1.35E-02	0.00136	0.0135	2.86646	1.86967	1	ACTG1
Cellular Response to Therapeutics	Se x Hg	7.76E-04-7.73E-03	0.000776	0.00773	3.11014	2.11182	1	ACTG1
Nervous System Development and Function	Hg	1.36E-03-1.28E-02	0.00136	0.0128	2.86646	1.89279	1	STXBP1
Nervous System Development and Function	Se	1.21E-03-4.04E-02	0.00121	0.0404	2.91721	1.39362	7	STXBP1,DPYSL3,GNAO1,GLUL,VIM,VDAC3,SYN1
Nervous System Development and Function	Se x Hg	6.19E-03-4.37E-02	0.00619	0.0437	2.20831	1.35952	2	CKB,ACTG1
Gastrointestinal Disease	Hg	2.03E-03-2.03E-03	0.00203	0.00203	2.6925	2.6925	1	SDHA
Gastrointestinal Disease	Se	1.67E-04-4.28E-02	0.000167	0.0428	3.77728	1.36856	6	SDHA,GPI,TUBB4B,GLUL,TUBB4A,FABP3
Gastrointestinal Disease	Se x Hg	4.45E-02-4.45E-02	0.0445	0.0445	1.35164	1.35164	1	CKB
Cell Morphology	Hg	2.71E-03-4.58E-02	0.00271	0.0458	2.56703	1.33913	4	ENO1,HSPD1,ATP6V1B1,ATP6V1B2
Cell Morphology	Se	3.21E-04-4.74E-02	0.000321	0.0474	3.49349	1.32422	12	YWHAQ,GNB1,GPI,HBZ,DPYSL3,GNAO1,VIM,GPX4,VDAC3,SEPT6,SYN1,ATP6V1B2
Cell Morphology	Se x Hg	3.1E-03-4.11E-02	0.0031	0.0411	2.50864	1.38616	3	CKB,NDUFS1,ATP6V1B1
Embryonic Development	Hg	2.71E-03-2.95E-02	0.00271	0.0295	2.56703	1.53018	3	ENO1,STXBP1,ACTG1
Embryonic Development	Se	1.21E-03-1.33E-02	0.00121	0.0133	2.91721	1.87615	3	STXBP1,GNAO1,VIM
Embryonic Development	Se x Hg	3.88E-04-3.48E-02	0.000388	0.0348	3.41117	1.45842	3	PPM1A,ACTG1,ATP6V1B1
Endocrine System Development and Function	Hg	2.71E-03-2.71E-03	0.00271	0.00271	2.56703	2.56703	1	STXBP1
Endocrine System Development and Function	Se	4.84E-03-1.92E-02	0.00484	0.0192	2.31515	1.7167	2	STXBP1,VIM
Organ Development	Hg	2.71E-03-2.95E-02	0.00271	0.0295	2.56703	1.53018	3	ENO1,STXBP1,ACTG1
Organ Development	Se	2.42E-03-4.84E-03	0.00242	0.00484	2.61618	2.31515	2	STXBP1,VIM
Organ Development	Se x Hg	3.88E-04-3.48E-02	0.000388	0.0348	3.41117	1.45842	3	PPM1A,ACTG1,ATP6V1B1
Organismal Development	Hg	2.71E-03-2.95E-02	0.00271	0.0295	2.56703	1.53018	2	STXBP1,ACTG1
Organismal Development	Se	1.21E-03-4.04E-02	0.00121	0.0404	2.91721	1.39362	5	STXBP1,DPYSL3,GNAO1,VIM,SYN1
Organismal Development	Se x Hg	3.88E-04-4.37E-02	0.000388	0.0437	3.41117	1.35952	5	CKB,ATP5A1,PPM1A,ACTG1,ATP6V1B1
Tissue Development	Hg	2.71E-03-2.95E-02	0.00271	0.0295	2.56703	1.53018	2	STXBP1,ACTG1
Tissue Development	Se	2.94E-04-3.69E-02	0.000294	0.0369	3.53165	1.43297	8	GNB1,GPI,STXBP1,HBZ,DPYSL3,GNAO1,VIM,SYN1
Tissue Development	Se x Hg	3.88E-04-3.48E-02	0.000388	0.0348	3.41117	1.45842	3	PPM1A,ACTG1,ATP6V1B1
Tissue Morphology	Hg	2.71E-03-3.47E-02	0.00271	0.0347	2.56703	1.45967	3	ENO1,HSPA9,HSPD1
Tissue Morphology	Se	1.21E-03-4.04E-02	0.00121	0.0404	2.91721	1.39362	9	GNB1,STXBP1,DPYSL3,GNAO1,VIM,FABP3,GPX4,VDAC3,SYN1
Tissue Morphology	Se x Hg	6.19E-03-6.19E-03	0.00619	0.00619	2.20831	2.20831	1	CKB
Cell Signaling	Hg	3.39E-03-3.39E-03	0.00339	0.00339	2.4698	2.4698	1	ATP6V1B1
Cell Signaling	Se	3.06E-03-2.63E-02	0.00306	0.0263	2.51428	1.58004	3	YWHAQ,GNB1,GNAO1
Cell Signaling	Se x Hg	1.94E-03-1.94E-03	0.00194	0.00194	2.7122	2.7122	1	ATP6V1B1
Vitamin and Mineral Metabolism	Hg	3.39E-03-3.39E-03	0.00339	0.00339	2.4698	2.4698	1	ATP6V1B1
Vitamin and Mineral Metabolism	Se	1.92E-02-1.92E-02	0.0192	0.0192	1.7167	1.7167	1	VIM
Vitamin and Mineral Metabolism	Se x Hg	1.94E-03-1.94E-03	0.00194	0.00194	2.7122	2.7122	1	ATP6V1B1
Carbohydrate Metabolism	Hg	4.07E-03-4.74E-03	0.00407	0.00474	2.39041	2.32422	1	ALDOC
Carbohydrate Metabolism	Se	4.84E-03-4.16E-02	0.00484	0.0416	2.31515	1.38091	3	GPI,FABP3,ALDOC
Cellular Development	Hg	4.74E-03-2.95E-02	0.00474	0.0295	2.32422	1.53018	3	STXBP1,HSPD1,ACTG1
Cellular Development	Se	1.21E-03-3.69E-02	0.00121	0.0369	2.91721	1.43297	10	YWHAQ,STXBP1,HBZ,DPYSL3,TUBB4B,GNAO1,GLUL,VIM,GPX4,SYN1
Cellular Development	Se x Hg	1.69E-02-1.69E-02	0.0169	0.0169	1.77211	1.77211	1	ACTG1
Immune Cell Trafficking	Hg	4.74E-03-3.67E-02	0.00474	0.0367	2.32422	1.43533	1	HSPD1
Immune Cell Trafficking	Se	3.46E-02-3.46E-02	0.0346	0.0346	1.46092	1.46092	1	GNAO1
Inflammatory Response	Hg	4.74E-03-4.13E-02	0.00474	0.0413	2.32422	1.38405	4	ENO1,STXBP1,HSPD1,ACTG1
Inflammatory Response	Se	1.67E-04-4.04E-02	0.000167	0.0404	3.77728	1.39362	5	STXBP1,TUBB4B,GNAO1,VIM,TUBB4A
Inflammatory Response	Se x Hg	8.12E-03-4.45E-02	0.00812	0.0445	2.09044	1.35164	2	CKB,PPM1A
Protein Degradation	Hg	5.37E-03-5.37E-03	0.00537	0.00537	2.27003	2.27003	2	STXBP1,HSPD1
Protein Degradation	Se	1.67E-02-1.67E-02	0.0167	0.0167	1.77728	1.77728	2	STXBP1,PSMD8
Protein Synthesis	Hg	5.37E-03-4.39E-02	0.00537	0.0439	2.27003	1.35754	3	STXBP1,HSPD1,ALDOC
Protein Synthesis	Se	1.33E-02-4.97E-02	0.0133	0.0497	1.87615	1.30364	7	STXBP1,DPYSL3,HBZ,GLUL,GPX4,PSMD8,ALDOC
Humoral Immune Response	Hg	5.42E-03-5.42E-03	0.00542	0.00542	2.266	2.266	1	HSPD1
Inflammatory Disease	Hg	5.42E-03-2.42E-02	0.00542	0.0242	2.266	1.61618	3	ENO1,HSPD1,LDHB
Inflammatory Disease	Se	1.67E-04-1.64E-02	0.000167	0.0164	3.77728	1.78516	5	GPI,TUBB4B,VIM,GLUL,TUBB4A
Inflammatory Disease	Se x Hg	4.45E-02-4.45E-02	0.0445	0.0445	1.35164	1.35164	1	CKB
Hematological Disease	Hg	6.09E-03-4.61E-02	0.00609	0.0461	2.21538	1.3363	6	ENO1,ATP5A1,HSPD1,ACTG1,ATP6V1B2,ATP6V1B1
Hematological Disease	Se	1.27E-04-4.93E-02	0.000127	0.0493	3.8962	1.30715	7	GNB1,GPI,HBZ,TUBB4B,TUBB4A,SEPT6,ATP6V1B2
Hematological Disease	Se x Hg	3.49E-03-3.29E-02	0.00349	0.0329	2.45717	1.4828	4	NDUFS1,ATP5A1,ACTG1,ATP6V1B1
Immunological Disease	Hg	6.09E-03-4.61E-02	0.00609	0.0461	2.21538	1.3363	6	ENO1,ATP5A1,HSPD1,ACTG1,LDHB,ATP6V1B1
Immunological Disease	Se	1.27E-04-4.93E-02	0.000127	0.0493	3.8962	1.30715	6	GNB1,TUBB4B,VIM,TUBB4A,SEPT6,ATP6V1B2
Immunological Disease	Se x Hg	3.49E-03-3.29E-02	0.00349	0.0329	2.45717	1.4828	4	NDUFS1,ATP5A1,ACTG1,ATP6V1B1
Lipid Metabolism	Hg	6.77E-03-6.77E-03	0.00677	0.00677	2.16941	2.16941	1	SDHA
Lipid Metabolism	Se	1.21E-03-3.81E-02	0.00121	0.0381	2.91721	1.41908	4	SDHA,VIM,GPX4,FABP3
Amino Acid Metabolism	Hg	8.12E-03-8.12E-03	0.00812	0.00812	2.09044	2.09044	1	STXBP1
Amino Acid Metabolism	Se	1.21E-03-3.22E-02	0.00121	0.0322	2.91721	1.49214	5	STXBP1,GLUL,GPX4,FABP3,SYN1
Amino Acid Metabolism	Se x Hg	1.16E-03-1.16E-03	0.00116	0.00116	2.93554	2.93554	1	CKB
Renal and Urological System Development and Function	Hg	9.46E-03-3.34E-02	0.00946	0.0334	2.02411	1.47625	2	ENO1,ATP6V1B1
Renal and Urological System Development and Function	Se	2.75E-02-2.75E-02	0.0275	0.0275	1.56067	1.56067	1	VIM
Renal and Urological System Development and Function	Se x Hg	1.16E-03-2.91E-02	0.00116	0.0291	2.93554	1.53611	2	PPM1A,ATP6V1B1
Hair and Skin Development and Function	Hg	1.01E-02-1.01E-02	0.0101	0.0101	1.99568	1.99568	1	ENO1
Hair and Skin Development and Function	Se	1.92E-02-1.92E-02	0.0192	0.0192	1.7167	1.7167	1	VIM
Hair and Skin Development and Function	Se x Hg	3.88E-04-3.81E-02	0.000388	0.0381	3.41117	1.41908	1	PPM1A
Skeletal and Muscular Disorders	Hg	1.27E-02-2.19E-02	0.0127	0.0219	1.8962	1.65956	5	SDHA,ENO1,HSPD1,LDHB,ATP6V1B2
Skeletal and Muscular Disorders	Se	4.7E-08-3.81E-02	4.7e-08	0.0381	7.3279	1.41908	15	SDHA,TUBB4B,DPYSL3,VIM,ATP6V1A,TUBB2B,GNB1,GPI,GNAO1,GLUL,TUBB4A,GPX4,SEPT6,SYN1,ATP6V1B2
Skeletal and Muscular Disorders	Se x Hg	3.87E-03-3.16E-02	0.00387	0.0316	2.41229	1.50031	3	CKB,NDUFS1,NDUFS2
Infectious Diseases	Hg	1.35E-02-2.2E-02	0.0135	0.022	1.86967	1.65758	2	HSPD1,ATP6V1B2
Infectious Diseases	Se	2.64E-04-4.22E-02	0.000264	0.0422	3.5784	1.37469	8	STXBP1,GPI,TUBB4B,HBZ,GLUL,TUBB4A,ATP6V1A,ATP6V1B2
Post-Translational Modification	Hg	1.35E-02-4.39E-02	0.0135	0.0439	1.86967	1.35754	2	HSPD1,ALDOC
Post-Translational Modification	Se	2.42E-03-4.97E-02	0.00242	0.0497	2.61618	1.30364	3	GLUL,GPX4,ALDOC
Post-Translational Modification	Se x Hg	1.55E-03-1.55E-03	0.00155	0.00155	2.80967	2.80967	1	PPM1A
Protein Folding	Hg	1.35E-02-1.35E-02	0.0135	0.0135	1.86967	1.86967	1	HSPD1
Connective Tissue Disorders	Hg	1.68E-02-2.19E-02	0.0168	0.0219	1.77469	1.65956	4	ENO1,HSPD1,LDHB,ALDOC
Connective Tissue Disorders	Se	2.13E-04-2.99E-02	0.000213	0.0299	3.67162	1.52433	8	GPI,HBZ,TUBB4B,GLUL,VIM,TUBB4A,GPX4,ALDOC
Cardiovascular Disease	Hg	1.82E-02-1.82E-02	0.0182	0.0182	1.73993	1.73993	1	SDHA
Cardiovascular Disease	Se	2.38E-04-3.22E-02	0.000238	0.0322	3.62342	1.49214	7	SDHA,GPI,TUBB4B,GNAO1,VIM,TUBB4A,FABP3
Cardiovascular System Development and Function	Hg	2.08E-02-4.65E-02	0.0208	0.0465	1.68194	1.33255	3	ENO1,HSPD1,ACTG1
Cardiovascular System Development and Function	Se	1.21E-03-4.04E-02	0.00121	0.0404	2.91721	1.39362	4	GNB1,GNAO1,VIM,FABP3
Cardiovascular System Development and Function	Se x Hg	1.69E-02-1.69E-02	0.0169	0.0169	1.77211	1.77211	1	ACTG1
Organ Morphology	Hg	2.08E-02-3.47E-02	0.0208	0.0347	1.68194	1.45967	2	ENO1,HSPD1
Organ Morphology	Se	3.21E-04-4.04E-02	0.000321	0.0404	3.49349	1.39362	8	GNB1,DPYSL3,GNAO1,VIM,TUBB4A,GPX4,VDAC3,SYN1
Organ Morphology	Se x Hg	2.34E-02-4.37E-02	0.0234	0.0437	1.63078	1.35952	2	CKB,ATP6V1B1
Skeletal and Muscular System Development and Function	Hg	2.08E-02-2.95E-02	0.0208	0.0295	1.68194	1.53018	3	ENO1,HSPD1,ACTG1
Skeletal and Muscular System Development and Function	Se	2.42E-03-4.78E-02	0.00242	0.0478	2.61618	1.32057	3	GNB1,GNAO1,VIM
Skeletal and Muscular System Development and Function	Se x Hg	1.69E-02-1.69E-02	0.0169	0.0169	1.77211	1.77211	1	ACTG1
Protein Trafficking	Hg	2.22E-02-2.22E-02	0.0222	0.0222	1.65365	1.65365	1	HSPA9
Tumor Morphology	Hg	2.28E-02-2.28E-02	0.0228	0.0228	1.64207	1.64207	1	ENO1
Tumor Morphology	Se	1.21E-03-1.21E-03	0.00121	0.00121	2.91721	2.91721	1	VIM
Cellular Movement	Hg	2.42E-02-2.42E-02	0.0242	0.0242	1.61618	1.61618	1	ENO1
Cellular Movement	Se	2.42E-03-3.46E-02	0.00242	0.0346	2.61618	1.46092	5	GNB1,YWHAQ,GPI,GNAO1,VIM
Cellular Movement	Se x Hg	3.17E-02-3.17E-02	0.0317	0.0317	1.49894	1.49894	1	PPM1A
Respiratory Disease	Hg	2.42E-02-4.01E-02	0.0242	0.0401	1.61618	1.39686	3	ENO1,HSPD1,ALDOC
Respiratory Disease	Se	1.47E-04-1.13E-02	0.000147	0.0113	3.83268	1.94692	6	GPI,TUBB4B,GLUL,VIM,TUBB4A,ALDOC
Respiratory Disease	Se x Hg	3.78E-02-3.78E-02	0.0378	0.0378	1.42251	1.42251	1	CKB
Auditory and Vestibular System Development and Function	Hg	3.28E-02-3.28E-02	0.0328	0.0328	1.48413	1.48413	1	ACTG1
Auditory and Vestibular System Development and Function	Se x Hg	1.89E-02-3.48E-02	0.0189	0.0348	1.72354	1.45842	2	ACTG1,ATP6V1B1
Visual System Development and Function	Hg	3.47E-02-3.47E-02	0.0347	0.0347	1.45967	1.45967	1	HSPD1
Visual System Development and Function	Se	1.21E-03-1.21E-03	0.00121	0.00121	2.91721	2.91721	1	GPX4
Free Radical Scavenging	Se	2.52E-02-2.52E-02	0.0252	0.0252	1.5986	1.5986	1	GPX4
Free Radical Scavenging	Se x Hg	1.16E-03-3.1E-03	0.00116	0.0031	2.93554	2.50864	1	NDUFS1
Drug Metabolism	Se	4.84E-03-1.56E-02	0.00484	0.0156	2.31515	1.80688	2	GNAO1,GPX4
Drug Metabolism	Se x Hg	3.06E-02-3.06E-02	0.0306	0.0306	1.51428	1.51428	1	NDUFS1
Cell Cycle	Se	1.21E-03-3.81E-02	0.00121	0.0381	2.91721	1.41908	5	YWHAQ,GPI,VIM,GPX4,VDAC3
Cell Cycle	Se x Hg	1.16E-03-1.16E-03	0.00116	0.00116	2.93554	2.93554	1	PPM1A
Behavior	Se	1.41E-03-4.62E-02	0.00141	0.0462	2.85078	1.33536	4	GNB1,GNAO1,VDAC3,SYN1
Behavior	Se x Hg	7.35E-03-3.48E-02	0.00735	0.0348	2.13371	1.45842	1	CKB
Connective Tissue Development and Function	Se	4.84E-03-3.81E-02	0.00484	0.0381	2.31515	1.41908	2	GPI,VIM
Respiratory System Development and Function	Se	8.45E-03-8.45E-03	0.00845	0.00845	2.07314	2.07314	1	VDAC3
Organismal Functions	Se	3.63E-03-3.63E-03	0.00363	0.00363	2.44009	2.44009	1	VIM
Organismal Survival	Se	1.36E-02-1.36E-02	0.0136	0.0136	1.86646	1.86646	9	GNB1,STXBP1,HBZ,GNAO1,VIM,GPX4,FABP3,PSMC2,VDAC3
Digestive System Development and Function	Se	2.42E-03-2.42E-03	0.00242	0.00242	2.61618	2.61618	1	VIM
Hepatic System Disease	Se	2.42E-03-2.42E-03	0.00242	0.00242	2.61618	2.61618	1	GLUL
Dermatological Diseases and Conditions	Se	1.67E-04-2.28E-02	0.000167	0.0228	3.77728	1.64207	3	TUBB4B,VIM,TUBB4A

## Sheet: Supplementary Table2C
Analysis	Categories	Diseases or Functions Annotation	p-Value	-log(p-value)	Predicted Activation State	Activation z-score	Flags	# Molecules	Molecules
Hg	Organismal Injury and Abnormalities	abnormal pH regulation	0.00339	2.4698				1	ATP6V1B1
Hg	Cell Signaling, Molecular Transport, Vitamin and Mineral Metabolism	abnormal quantity of Ca2+	0.00339	2.4698				1	ATP6V1B1
Hg	Organismal Injury and Abnormalities, Renal and Urological Disease	abnormal transport in kidney	0.00339	2.4698				1	ATP6V1B1
Hg	Organismal Injury and Abnormalities, Renal and Urological Disease	acidification of urine	0.00136	2.86646				1	ATP6V1B1
Hg	Cellular Compromise	acidification of vacuole	0.00271	2.56703				1	ATP6V1B2
Hg	Cell-To-Cell Signaling and Interaction, Endocrine System Development and Function	activation of beta islet cells	0.00271	2.56703				1	STXBP1
Hg	Cell-To-Cell Signaling and Interaction, Hematological System Development and Function, Immune Cell Trafficking, Inflammatory Response	activation of cytotoxic T cells	0.0367	1.43533				1	HSPD1
Hg	Cardiovascular System Development and Function, Cell-To-Cell Signaling and Interaction	activation of endothelial cells	0.0465	1.33255				1	HSPD1
Hg	Cell-To-Cell Signaling and Interaction, Hematological System Development and Function, Immune Cell Trafficking, Inflammatory Response	activation of monocyte-derived macrophages	0.00474	2.32422				1	HSPD1
Hg	Cell-To-Cell Signaling and Interaction, Hematological System Development and Function, Immune Cell Trafficking, Inflammatory Response	activation of PBMCs	0.0108	1.96658				1	HSPD1
Hg	Cell Death and Survival	cell death of tumor cell lines	0.00169	2.77211		-0.785		6	ATP5A1,CCT5,CCT8,ENO1,HSPA9,HSPD1
Hg	Cell-To-Cell Signaling and Interaction, Hematological System Development and Function, Inflammatory Response	aggregation of blood platelets	0.00947	2.02365				2	ACTG1,STXBP1
Hg	Cellular Movement, Hematological Disease, Immunological Disease, Inflammatory Disease, Inflammatory Response, Respiratory Disease	allergic pulmonary eosinophilia	0.0242	1.61618				1	ENO1
Hg	Cell Death and Survival	cell death of neuroblastoma cell lines	2.44e-07	6.61261		-0.44		5	ATP5A1,CCT5,CCT8,ENO1,HSPA9
Hg	Cancer, Cell Death and Survival, Organismal Injury and Abnormalities, Tumor Morphology	apoptosis of carcinoma cells	0.0228	1.64207				1	ENO1
Hg	Cell Death and Survival	apoptosis of intestinal cell lines	0.0228	1.64207				1	HSPD1
Hg	Cell Death and Survival	apoptosis of skin cell lines	0.00812	2.09044				1	HSPD1
Hg	Auditory Disease, Hereditary Disorder, Neurological Disease, Organismal Injury and Abnormalities	autosomal dominant deafness type 20	0.000679	3.16813				1	ACTG1
Hg	Cell Death and Survival	cell death	0.00109	2.96257		0.294		9	ALDOC,ATP5A1,CCT5,CCT8,ENO1,HSPA9,HSPD1,SDHA,STXBP1
Hg	Hereditary Disorder, Neurological Disease, Organismal Injury and Abnormalities	autosomal recessive hereditary sensory neuropathy with spastic paralegia	0.000679	3.16813				1	CCT5
Hg	Developmental Disorder, Ophthalmic Disease, Organismal Injury and Abnormalities	Baraitser-Winter syndrome type 2	0.000679	3.16813				1	ACTG1
Hg	Cell-To-Cell Signaling and Interaction, Reproductive System Development and Function	binding of sperm	0.000398	3.40012				2	CCT5,CCT8
Hg	Cellular Assembly and Organization	binding of zona pellucida	0.000281	3.55129				2	CCT5,CCT8
Hg	Cell Death and Survival	necrosis	0.000983	3.00745		0.45		8	ATP5A1,CCT5,CCT8,ENO1,HSPA9,HSPD1,SDHA,STXBP1
Hg	Cancer, Hematological Disease, Immunological Disease, Organismal Injury and Abnormalities	acute leukemia	0.0461	1.3363				4	ACTG1,ATP5A1,ATP6V1B1,HSPD1
Hg	Cancer, Gastrointestinal Disease, Organismal Injury and Abnormalities	Carney triad	0.00203	2.6925				1	SDHA
Hg	Cancer, Endocrine System Disorders, Organismal Injury and Abnormalities	Carney-Stratakis syndrome	0.00407	2.39041				1	SDHA
Hg	Metabolic Disease, Neurological Disease, Psychological Disorders	Alzheimer's disease	0.0108	1.96658				3	ATP5A1,HSPA9,HSPD1
Hg	Cell Death and Survival	cell death of brain	0.0228	1.64207				2	HSPD1,SDHA
Hg	Hereditary Disorder, Organismal Injury and Abnormalities	autosomal recessive disease	0.00825	2.08355				4	ATP5A1,ATP6V1B1,CCT5,HSPD1
Hg	Cell Death and Survival, Neurological Disease	cell death of striatal neurons	0.0341	1.46725				1	SDHA
Hg	Cancer, Organismal Injury and Abnormalities, Reproductive System Disease	breast cancer	0.0481	1.31785				4	ALDOC,ATP5A1,ENO1,HSPD1
Hg	Cardiovascular System Development and Function, Cell Death and Survival, Skeletal and Muscular System Development and Function	cell viability of cardiomyocytes	0.0215	1.66756				1	HSPD1
Hg	Cancer, Cellular Response to Therapeutics, Organismal Injury and Abnormalities	chemotherapy resistance of tumor cell lines	0.0135	1.86967				1	ACTG1
Hg	Cellular Function and Maintenance	Clathrin mediated endocytosis	0.0387	1.41229				1	ATP6V1B2
Hg	Cellular Growth and Proliferation	colony formation of leukemia cell lines	0.0162	1.79048				1	ENO1
Hg	Cellular Growth and Proliferation, Hematological System Development and Function, Hematopoiesis	colony formation of LSK cells	0.000679	3.16813				1	HSPA9
Hg	Hereditary Disorder, Metabolic Disease, Organismal Injury and Abnormalities	combined oxidative phosphorylation deficiency 22	0.000679	3.16813				1	ATP5A1
Hg	Cardiovascular System Development and Function, Cell Morphology, Organ Development, Organ Morphology, Skeletal and Muscular System Development and Function	contractility of cardiomyocytes	0.0208	1.68194				1	ENO1
Hg	Cellular Compromise, Inflammatory Response	degranulation of blood platelets	0.00609	2.21538				1	STXBP1
Hg	Cellular Compromise, Inflammatory Response	degranulation of leukocyte cell lines	0.0413	1.38405				1	STXBP1
Hg	Cellular Assembly and Organization	docking of vesicles	0.0215	1.66756				1	STXBP1
Hg	Cellular Response to Therapeutics	drug resistance of fibroblast cell lines	0.00136	2.86646				1	ACTG1
Hg	Cellular Compromise	dysfunction of mitochondria	0.000556	3.25493				2	HSPA9,SDHA
Hg	Hereditary Disorder, Neurological Disease, Organismal Injury and Abnormalities	early infantile epileptic encephalopathy type 4	0.000679	3.16813				1	STXBP1
Hg	Cellular Function and Maintenance	endocytosis	0.0326	1.48678				2	ATP6V1B2,HSPA9
Hg	Cellular Function and Maintenance	endocytosis by tumor cell lines	0.0478	1.32057				1	ATP6V1B2
Hg	Cellular Function and Maintenance	engulfment by cervical cancer cell lines	0.0419	1.37779				1	ATP6V1B2
Hg	Cellular Assembly and Organization, Cellular Function and Maintenance, Molecular Transport	exocytosis of chromaffin vesicles	0.000679	3.16813				1	STXBP1
Hg	Cellular Development, Cellular Growth and Proliferation, Hematological System Development and Function, Humoral Immune Response	expansion of B-1 lymphocytes	0.00542	2.266				1	HSPD1
Hg	Cellular Development, Cellular Growth and Proliferation, Hematological System Development and Function	expansion of TREG cells	0.0101	1.99568				1	HSPD1
Hg	Cardiovascular Disease, Hereditary Disorder, Organismal Injury and Abnormalities, Skeletal and Muscular Disorders	familial dilated cardiomyopathy	0.0182	1.73993				1	SDHA
Hg	Cancer, Organismal Injury and Abnormalities	breast or ovarian cancer	0.00601	2.22113				6	ALDOC,ATP5A1,ATP6V1B1,CCT5,ENO1,HSPD1
Hg	Embryonic Development, Nervous System Development and Function, Organ Development, Organismal Development, Tissue Development	formation of barrel cortex	0.00271	2.56703				1	STXBP1
Hg	Cell Death and Survival, DNA Replication, Recombination, and Repair	fragmentation of DNA fragment	0.0374	1.42713				1	ENO1
Hg	Cellular Compromise	fragmentation of mitochondria	0.0295	1.53018				1	HSPA9
Hg	Cellular Function and Maintenance, Hematological System Development and Function	function of regulatory T lymphocytes	0.0281	1.55129				1	HSPD1
Hg	Cellular Assembly and Organization	fusion of cellular membrane	0.038	1.42022				1	STXBP1
Hg	Cell-To-Cell Signaling and Interaction, Cellular Assembly and Organization, Nervous System Development and Function	fusion of synaptic vesicles	0.00609	2.21538				1	STXBP1
Hg	Auditory and Vestibular System Development and Function	hearing	0.0328	1.48413				1	ACTG1
Hg	Hereditary Disorder, Neurological Disease, Organismal Injury and Abnormalities	hereditary spastic paraplegia autosomal dominant 13	0.000679	3.16813				1	HSPD1
Hg	Post-Translational Modification, Protein Synthesis	heterotetramerization of protein	0.0281	1.55129				1	ALDOC
Hg	Cellular Function and Maintenance, Small Molecule Biochemistry	homeostasis of H+	0.00407	2.39041				1	ATP6V1B2
Hg	Post-Translational Modification, Protein Synthesis	homotetramerization of protein	0.0439	1.35754				1	ALDOC
Hg	Cancer, Organismal Injury and Abnormalities, Reproductive System Disease	female genital neoplasm	0.024	1.61979				8	ACTG1,ATP6V1B1,ATP6V1B2,CCT5,ENO1,HSPD1,SDHA,STXBP1
Hg	DNA Replication, Recombination, and Repair, Energy Production, Nucleic Acid Metabolism, Small Molecule Biochemistry	hydrolysis of ATP	0.000474	3.32422				2	CCT5,HSPD1
Hg	Endocrine System Disorders, Hematological Disease	hypercalcemia	0.0222	1.65365				1	ATP6V1B2
Hg	Hereditary Disorder, Neurological Disease, Organismal Injury and Abnormalities, Psychological Disorders	hypomyelinating leukodystrophy type 4	0.000679	3.16813				1	HSPD1
Hg	Cardiovascular Disease, Organismal Injury and Abnormalities, Skeletal and Muscular Disorders	idiopathic dilated cardiomyopathy	0.0182	1.73993				1	SDHA
Hg	Inflammatory Disease, Ophthalmic Disease, Organismal Injury and Abnormalities	iridocyclitis	0.00542	2.266				1	HSPD1
Hg	Developmental Disorder, Hereditary Disorder, Metabolic Disease, Organismal Injury and Abnormalities	lactate dehydrogenase B deficiency	0.000679	3.16813				1	LDHB
Hg	Hereditary Disorder, Metabolic Disease, Neurological Disease, Organismal Injury and Abnormalities, Skeletal and Muscular Disorders	Leigh syndrome	0.0215	1.66756				1	SDHA
Hg	Neurological Disease	leukoencephalopathy	0.00188	2.72584				2	HSPD1,SDHA
Hg	Developmental Disorder, Hereditary Disorder, Metabolic Disease, Organismal Injury and Abnormalities	lipidosis	0.00879	2.05601				1	ATP5A1
Hg	Hereditary Disorder, Neurological Disease, Organismal Injury and Abnormalities, Psychological Disorders, Skeletal and Muscular Disorders	Huntington's Disease	0.0127	1.8962				3	ATP6V1B2,LDHB,SDHA
Hg	Connective Tissue Disorders, Developmental Disorder, Hereditary Disorder, Organismal Injury and Abnormalities	Marfan's syndrome	0.0168	1.77469				1	ALDOC
Hg	Cellular Development, Hematopoiesis	maturation of bone marrow-derived dendritic cells	0.0195	1.70997				1	HSPD1
Hg	Cellular Assembly and Organization, Cellular Development, Nervous System Development and Function, Tissue Development	maturation of synaptic vesicles	0.00474	2.32422				1	STXBP1
Hg	Cellular Assembly and Organization	membrane fusion of proteoliposomes	0.00136	2.86646				1	STXBP1
Hg	Energy Production, Nucleic Acid Metabolism, Small Molecule Biochemistry	metabolism of ATP	0.000329	3.4828				2	ATP5A1,ATP5H
Hg	Carbohydrate Metabolism, Small Molecule Biochemistry	metabolism of D-fructose	0.00407	2.39041				1	ALDOC
Hg	Carbohydrate Metabolism	metabolism of fructose-1,6-diphosphate	0.00474	2.32422				1	ALDOC
Hg	Cancer, Organismal Injury and Abnormalities	lymphoid cancer	0.0498	1.30277				5	ACTG1,ATP5A1,ATP6V1B1,ATP6V1B2,HSPD1
Hg	Lipid Metabolism, Small Molecule Biochemistry	metabolism of succinic acid	0.00677	2.16941				1	SDHA
Hg	Developmental Disorder, Hereditary Disorder, Metabolic Disease, Organismal Injury and Abnormalities	mitochondrial complex V deficiency nuclear type 4	0.000679	3.16813				1	ATP5A1
Hg	Developmental Disorder, Hereditary Disorder, Metabolic Disease, Organismal Injury and Abnormalities	mitochondrial respiratory chain deficiency	0.000842	3.07469				2	ATP5A1,SDHA
Hg	Cell Morphology	morphology of clathrin-coated structures	0.0458	1.33913				1	ATP6V1B2
Hg	Nucleic Acid Metabolism, Small Molecule Biochemistry	metabolism of nucleoside triphosphate	0.000135	3.86967				3	ATP5A1,ATP5H,HSPD1
Hg	Cancer, Endocrine System Disorders, Organismal Injury and Abnormalities	neuroendocrine tumor	0.00162	2.79048				3	ALDOC,HSPD1,SDHA
Hg	Cell Death and Survival, Neurological Disease	neuronal cell death	0.0213	1.67162				3	HSPD1,SDHA,STXBP1
Hg	Cancer, Organismal Injury and Abnormalities, Respiratory Disease	non-small cell lung cancer	0.0401	1.39686				3	ALDOC,ENO1,HSPD1
Hg	Molecular Transport, Protein Trafficking	nuclear export of protein	0.0222	1.65365				1	HSPA9
Hg	Cellular Assembly and Organization, Cellular Function and Maintenance	number of stereocilia	0.00542	2.266				1	ACTG1
Hg	Cardiovascular System Development and Function, Cellular Assembly and Organization, Cellular Development, Cellular Function and Maintenance, Cellular Growth and Proliferation, Embryonic Development, Organ Development, Organismal Development, Skeletal and Muscular System Development and Function, Tissue Development	organization of sarcomere	0.0295	1.53018				1	ACTG1
Hg	Renal and Urological System Development and Function	osmolality of urine	0.0334	1.47625				1	ATP6V1B1
Hg	Cancer, Endocrine System Disorders, Organismal Injury and Abnormalities, Reproductive System Disease	ovarian cancer	0.0265	1.57675				3	ATP6V1B1,CCT5,ENO1
Hg	Cancer, Endocrine System Disorders, Organismal Injury and Abnormalities, Reproductive System Disease	Ovarian Cancer and Tumors	0.0129	1.88941				5	ACTG1,ATP6V1B1,ATP6V1B2,CCT5,ENO1
Hg	Cancer, Endocrine System Disorders, Hereditary Disorder, Organismal Injury and Abnormalities	paragangliomas type 5	0.000679	3.16813				1	SDHA
Hg	Cell Morphology, Cellular Function and Maintenance	pH of cells	0.0275	1.56067				1	ATP6V1B1
Hg	Renal and Urological System Development and Function	pH of urine	0.0115	1.9393				1	ATP6V1B1
Hg	Cancer, Endocrine System Disorders, Neurological Disease, Organismal Injury and Abnormalities	pheochromocytoma	0.0367	1.43533				1	SDHA
Hg	Cell Morphology	polarity of T lymphocytes	0.00271	2.56703				1	HSPD1
Hg	Cancer, Endocrine System Disorders, Organismal Injury and Abnormalities, Reproductive System Disease	primary ovarian cancer	0.00112	2.95078				2	ATP6V1B1,CCT5
Hg	Cell-To-Cell Signaling and Interaction, Cellular Assembly and Organization, Cellular Function and Maintenance, Molecular Transport	priming of synaptic vesicles	0.00879	2.05601				1	STXBP1
Hg	Molecular Transport	quantity of bicarbonate	0.00946	2.02411				1	ATP6V1B1
Hg	Embryonic Development, Tissue Morphology	quantity of embryonic cell lines	0.0115	1.9393				1	ENO1
Hg	Hair and Skin Development and Function, Tissue Morphology	quantity of epithelial cell lines	0.0101	1.99568				1	ENO1
Hg	Renal and Urological System Development and Function, Tissue Morphology	quantity of kidney cell lines	0.00946	2.02411				1	ENO1
Hg	Hematological System Development and Function, Hematopoiesis, Tissue Morphology	quantity of LSK cells	0.00271	2.56703				1	HSPA9
Hg	Tissue Morphology	quantity of neuroblastoma cell lines	0.00339	2.4698				1	ENO1
Hg	Organ Morphology, Tissue Morphology, Visual System Development and Function	quantity of photoreceptors	0.0347	1.45967				1	HSPD1
Hg	Cell-To-Cell Signaling and Interaction	recognition of cells	0.0235	1.62893				1	STXBP1
Hg	Cell Death and Survival, Cellular Function and Maintenance	reconstitution of LSK cells	0.000679	3.16813				1	HSPA9
Hg	Energy Production, Nucleic Acid Metabolism, Small Molecule Biochemistry	recovery of ATP	0.00271	2.56703				1	HSPD1
Hg	Cancer, Hematological Disease, Immunological Disease, Organismal Injury and Abnormalities	recurrent childhood acute lymphoblastic leukemia	0.00609	2.21538				1	ACTG1
Hg	Post-Translational Modification, Protein Folding	refolding of protein	0.0135	1.86967				1	HSPD1
Hg	Hereditary Disorder, Metabolic Disease, Organismal Injury and Abnormalities, Renal and Urological Disease	renal tubular acidosis with progressive nerve deafness	0.000679	3.16813				1	ATP6V1B1
Hg	Infectious Diseases	replication of Influenza A virus	0.022	1.65758				2	ATP6V1B2,HSPD1
Hg	Cell Death and Survival, Hematological System Development and Function, Hematopoiesis	repopulation of hematopoietic progenitor cells	0.00879	2.05601				1	HSPA9
Hg	Connective Tissue Disorders, Immunological Disease, Inflammatory Disease, Skeletal and Muscular Disorders	rheumatoid arthritis	0.0219	1.65956				3	ENO1,HSPD1,LDHB
Hg	Cancer, Gastrointestinal Disease, Organismal Injury and Abnormalities	sporadic c-KIT mutation negative PDGFRA mutation negative gastrointestinal stromal tumor	0.00203	2.6925				1	SDHA
Hg	Protein Degradation, Protein Synthesis	stabilization of protein	0.00537	2.27003				2	HSPD1,STXBP1
Hg	Developmental Disorder, Hereditary Disorder, Metabolic Disease, Organismal Injury and Abnormalities	succinate-coenzyme q reductase deficiency	0.00203	2.6925				1	SDHA
Hg	Cell-To-Cell Signaling and Interaction, Nervous System Development and Function	synaptic transmission of neocortical neurons	0.00136	2.86646				1	STXBP1
Hg	Cell-To-Cell Signaling and Interaction, Nervous System Development and Function	synaptic transmission of neuromuscular synapse	0.0128	1.89279				1	STXBP1
Hg	Amino Acid Metabolism, Molecular Transport, Small Molecule Biochemistry	transport of glycine	0.00812	2.09044				1	STXBP1
Hg	Molecular Transport	transport of H+	0.000454	3.34294				2	ATP6V1B1,ATP6V1B2
Hg	Cancer, Organismal Injury and Abnormalities, Reproductive System Disease	tumorigenesis of reproductive tract	0.0239	1.6216				8	ACTG1,ATP6V1B1,ATP6V1B2,CCT5,ENO1,HSPD1,SDHA,STXBP1
Hg	Infectious Diseases	viral entry by Influenza virus	0.0148	1.82974				1	ATP6V1B2
Hg	Infectious Diseases	viral entry of carcinoma cell lines	0.0135	1.86967				1	ATP6V1B2
Hg	Infectious Diseases	viral entry of lung cancer cell lines	0.0135	1.86967				1	ATP6V1B2
Se	Neurological Disease, Psychological Disorders	disorder of basal ganglia	2.97e-11	10.5272				13	ATP6V1A,ATP6V1B2,DPYSL3,GNAO1,GNB1,GPI,SDHA,SEPT6,SYN1,TUBB2B,TUBB4A,TUBB4B,VIM
Se	Neurological Disease	Movement Disorders	2.35e-09	8.62893				13	ATP6V1A,ATP6V1B2,DPYSL3,GNAO1,GNB1,GPI,SDHA,SEPT6,SYN1,TUBB2B,TUBB4A,TUBB4B,VIM
Se	Neurological Disease, Skeletal and Muscular Disorders	neuromuscular disease	4.7e-08	7.3279				11	ATP6V1A,ATP6V1B2,DPYSL3,GNAO1,GNB1,GPI,SDHA,SEPT6,SYN1,TUBB2B,VIM
Se	Neurological Disease	Neurodegeneration	0.00104	2.98297		-1.188	bias	4	DPYSL3,FABP3,STXBP1,VIM
Se	Neurological Disease	degeneration of nervous system	0.000761	3.11862		-1.165		4	DPYSL3,FABP3,STXBP1,VIM
Se	Immunological Disease, Organismal Injury and Abnormalities	Letterer-Siwe disease	0.000127	3.8962				2	TUBB4A,TUBB4B
Se	Cancer, Endocrine System Disorders, Organismal Injury and Abnormalities, Reproductive System Disease	advanced testicular carcinoma	0.000127	3.8962				2	TUBB4A,TUBB4B
Se	Cancer, Hematological Disease, Immunological Disease, Organismal Injury and Abnormalities	histiocytic lymphoma	0.000127	3.8962				2	TUBB4A,TUBB4B
Se	Cancer, Organismal Injury and Abnormalities, Reproductive System Disease	locally recurrent HER2 negative hormone receptor negative breast cancer	0.000127	3.8962				2	TUBB4A,TUBB4B
Se	Cancer, Organismal Injury and Abnormalities, Reproductive System Disease	locally recurrent HER2 negative hormone receptor negative breast carcinoma	0.000127	3.8962				2	TUBB4A,TUBB4B
Se	Cancer, Organismal Injury and Abnormalities	metastatic relapsed advanced cancer	0.000127	3.8962				2	TUBB4A,TUBB4B
Se	Cancer, Organismal Injury and Abnormalities, Renal and Urological Disease	progressive metastatic bladder cancer	0.000127	3.8962				2	TUBB4A,TUBB4B
Se	Cancer, Organismal Injury and Abnormalities, Renal and Urological Disease	relapsed bladder cancer	0.000127	3.8962				2	TUBB4A,TUBB4B
Se	Cancer, Organismal Injury and Abnormalities, Reproductive System Disease	stage 3c HER2 negative invasive breast adenocarcinoma	0.000127	3.8962				2	TUBB4A,TUBB4B
Se	Cancer, Organismal Injury and Abnormalities, Reproductive System Disease	stage 3c HER2 negative invasive breast cancer	0.000127	3.8962				2	TUBB4A,TUBB4B
Se	Cancer, Organismal Injury and Abnormalities, Reproductive System Disease	stage 4 HER2 negative invasive breast adenocarcinoma	0.000127	3.8962				2	TUBB4A,TUBB4B
Se	Cancer, Organismal Injury and Abnormalities, Reproductive System Disease	teratocarcinoma	0.000127	3.8962				2	TUBB4A,TUBB4B
Se	Cell Death and Survival, Neurological Disease	neuronal cell death	0.00409	2.38828		-0.961		5	DPYSL3,GNAO1,GPI,SDHA,STXBP1
Se	Cancer, Organismal Injury and Abnormalities, Reproductive System Disease	grade II HER2 negative hormone receptor positive breast cancer	0.000147	3.83268				2	TUBB4A,TUBB4B
Se	Cancer, Organismal Injury and Abnormalities, Reproductive System Disease	grade III HER2 negative hormone receptor positive breast cancer	0.000147	3.83268				2	TUBB4A,TUBB4B
Se	Cancer, Hematological Disease, Immunological Disease, Organismal Injury and Abnormalities	lymphosarcoma	0.000147	3.83268				2	TUBB4A,TUBB4B
Se	Cancer, Endocrine System Disorders, Neurological Disease, Organismal Injury and Abnormalities	metastatic malignant pheochromocytoma	0.000147	3.83268				2	TUBB4A,TUBB4B
Se	Cancer, Hematological Disease, Immunological Disease, Organismal Injury and Abnormalities	stage 3 Hodgkin's lymphoma	0.000147	3.83268				2	TUBB4A,TUBB4B
Se	Cancer, Hematological Disease, Immunological Disease, Organismal Injury and Abnormalities	stage 4 Hodgkin's lymphoma	0.000147	3.83268				2	TUBB4A,TUBB4B
Se	Cancer, Organismal Injury and Abnormalities, Reproductive System Disease	stage T2 HER2 negative hormone receptor negative breast cancer	0.000147	3.83268				2	TUBB4A,TUBB4B
Se	Cancer, Organismal Injury and Abnormalities, Reproductive System Disease	stage T3 HER2 negative hormone receptor negative breast cancer	0.000147	3.83268				2	TUBB4A,TUBB4B
Se	Cancer, Organismal Injury and Abnormalities, Reproductive System Disease	stage T4 HER2 negative hormone receptor negative breast cancer	0.000147	3.83268				2	TUBB4A,TUBB4B
Se	Cancer, Organismal Injury and Abnormalities, Respiratory Disease	unresectable, advanced non-small cell lung cancer	0.000147	3.83268				2	TUBB4A,TUBB4B
Se	Cancer, Dermatological Diseases and Conditions, Hematological Disease, Immunological Disease, Inflammatory Disease, Inflammatory Response, Organismal Injury and Abnormalities	advanced stage mycosis fungoides	0.000167	3.77728				2	TUBB4A,TUBB4B
Se	Cancer, Organismal Injury and Abnormalities, Reproductive System Disease	anthracycline-resistant taxane-naive metastatic breast cancer	0.000167	3.77728				2	TUBB4A,TUBB4B
Se	Cancer, Hematological Disease, Immunological Disease, Organismal Injury and Abnormalities	high grade secondary B-cell non-Hodgkin's disease	0.000167	3.77728				2	TUBB4A,TUBB4B
Se	Cancer, Hematological Disease, Immunological Disease, Organismal Injury and Abnormalities	primary effusion B cell lymphoma	0.000167	3.77728				2	TUBB4A,TUBB4B
Se	Ophthalmic Disease, Organismal Injury and Abnormalities	rhegmatogenous retinal detachment	0.000167	3.77728				2	TUBB4A,TUBB4B
Se	Cancer, Gastrointestinal Disease, Organismal Injury and Abnormalities	stage IV gastric cancer	0.000167	3.77728				2	TUBB4A,TUBB4B
Se	Cell Death and Survival	necrosis	0.0216	1.66555		-0.629		9	DPYSL3,GNAO1,GPI,GPX4,SDHA,STXBP1,TRAP1,VIM,YWHAQ
Se	Cancer, Organismal Injury and Abnormalities, Reproductive System Disease	choriocarcinoma	0.000213	3.67162				2	TUBB4A,TUBB4B
Se	Hereditary Disorder, Inflammatory Disease, Organismal Injury and Abnormalities	familial Mediterranean fever	0.000213	3.67162				2	TUBB4A,TUBB4B
Se	Cancer, Connective Tissue Disorders, Organismal Injury and Abnormalities	localized Ewing's sarcoma	0.000213	3.67162				2	TUBB4A,TUBB4B
Se	Cancer, Organismal Injury and Abnormalities, Reproductive System Disease	stage 4 HER2 negative invasive breast cancer	0.000213	3.67162				2	TUBB4A,TUBB4B
Se	Cancer, Organismal Injury and Abnormalities, Respiratory Disease	EGFR mutation negative non squamous non-small cell lung cancer	0.000238	3.62342				2	TUBB4A,TUBB4B
Se	Cardiovascular Disease, Inflammatory Disease, Organismal Injury and Abnormalities	pericarditis	0.000238	3.62342				2	TUBB4A,TUBB4B
Se	Cellular Compromise	degeneration of cells	0.00014	3.85387		-0.555	bias	5	DPYSL3,FABP3,GNB1,GPX4,STXBP1
Se	Cancer, Hematological Disease, Immunological Disease, Organismal Injury and Abnormalities	ALK positive large B cell lymphoma	0.000264	3.5784				2	TUBB4A,TUBB4B
Se	Cancer, Organismal Injury and Abnormalities, Reproductive System Disease	metastatic triple negative breast carcinoma	0.000264	3.5784				2	TUBB4A,TUBB4B
Se	Cancer, Organismal Injury and Abnormalities, Reproductive System Disease	penis cancer	0.000264	3.5784				2	TUBB4A,TUBB4B
Se	Cancer, Hematological Disease, Immunological Disease, Organismal Injury and Abnormalities	relapsed Philadelphia chromosome-negative acute lymphoblastic leukemia	0.000264	3.5784				2	TUBB4A,TUBB4B
Se	Infectious Diseases	viral entry of carcinoma cell lines	0.000264	3.5784				2	ATP6V1A,ATP6V1B2
Se	Infectious Diseases	viral entry of lung cancer cell lines	0.000264	3.5784				2	ATP6V1A,ATP6V1B2
Se	Cancer, Hematological Disease, Immunological Disease, Organismal Injury and Abnormalities	mediastinal large B-cell lymphoma	0.000292	3.53462				2	TUBB4A,TUBB4B
Se	Molecular Transport	transport of molecule	0.00416	2.38091		-0.524		8	ATP6V1A,ATP6V1B2,FABP3,GLUL,GNAO1,STXBP1,SYN1,VDAC3
Se	Cancer, Cardiovascular Disease, Organismal Injury and Abnormalities	AIDS related Kaposi sarcoma	0.000321	3.49349				2	TUBB4A,TUBB4B
Se	Cancer, Organismal Injury and Abnormalities	metastatic occult primary cancer of head and neck	0.000321	3.49349				2	TUBB4A,TUBB4B
Se	Cancer, Connective Tissue Disorders, Organismal Injury and Abnormalities, Respiratory Disease, Skeletal and Muscular Disorders	metastatic squamous cell cancer of the ethmoid sinus	0.000321	3.49349				2	TUBB4A,TUBB4B
Se	Cancer, Organismal Injury and Abnormalities, Respiratory Disease	metastatic squamous cell cancer of the glottis	0.000321	3.49349				2	TUBB4A,TUBB4B
Se	Cancer, Connective Tissue Disorders, Gastrointestinal Disease, Organismal Injury and Abnormalities, Respiratory Disease, Skeletal and Muscular Disorders	metastatic squamous cell cancer of the maxillary sinus	0.000321	3.49349				2	TUBB4A,TUBB4B
Se	Cancer, Organismal Injury and Abnormalities, Respiratory Disease	metastatic squamous cell cancer of the supraglottis	0.000321	3.49349				2	TUBB4A,TUBB4B
Se	Cancer, Gastrointestinal Disease, Organismal Injury and Abnormalities	metastatic squamous cell carcinoma of the lip	0.000321	3.49349				2	TUBB4A,TUBB4B
Se	Cell Morphology, Organ Morphology, Reproductive System Development and Function	morphology of sperm midpiece	0.000321	3.49349				2	GPX4,VDAC3
Se	Cancer, Organismal Injury and Abnormalities	recurrent occult primary cancer of head and neck	0.000321	3.49349				2	TUBB4A,TUBB4B
Se	Cancer, Connective Tissue Disorders, Organismal Injury and Abnormalities, Respiratory Disease, Skeletal and Muscular Disorders	recurrent squamous cell cancer of the ethmoid sinus	0.000321	3.49349				2	TUBB4A,TUBB4B
Se	Cancer, Organismal Injury and Abnormalities, Respiratory Disease	recurrent squamous cell cancer of the glottis	0.000321	3.49349				2	TUBB4A,TUBB4B
Se	Cancer, Gastrointestinal Disease, Organismal Injury and Abnormalities	recurrent squamous cell cancer of the lip	0.000321	3.49349				2	TUBB4A,TUBB4B
Se	Cancer, Connective Tissue Disorders, Gastrointestinal Disease, Organismal Injury and Abnormalities, Respiratory Disease, Skeletal and Muscular Disorders	recurrent squamous cell cancer of the maxillary sinus	0.000321	3.49349				2	TUBB4A,TUBB4B
Se	Cancer, Organismal Injury and Abnormalities, Respiratory Disease	recurrent squamous cell cancer of the supraglottis	0.000321	3.49349				2	TUBB4A,TUBB4B
Se	Cancer, Organismal Injury and Abnormalities	unresectable occult primary cancer of head and neck	0.000321	3.49349				2	TUBB4A,TUBB4B
Se	Cancer, Connective Tissue Disorders, Organismal Injury and Abnormalities, Respiratory Disease, Skeletal and Muscular Disorders	unresectable squamous cell cancer of the ethmoid sinus	0.000321	3.49349				2	TUBB4A,TUBB4B
Se	Cancer, Organismal Injury and Abnormalities, Respiratory Disease	unresectable squamous cell cancer of the glottis	0.000321	3.49349				2	TUBB4A,TUBB4B
Se	Cancer, Gastrointestinal Disease, Organismal Injury and Abnormalities, Respiratory Disease	unresectable squamous cell cancer of the hypopharynx	0.000321	3.49349				2	TUBB4A,TUBB4B
Se	Cancer, Gastrointestinal Disease, Organismal Injury and Abnormalities	unresectable squamous cell cancer of the lip	0.000321	3.49349				2	TUBB4A,TUBB4B
Se	Cancer, Connective Tissue Disorders, Gastrointestinal Disease, Organismal Injury and Abnormalities, Respiratory Disease, Skeletal and Muscular Disorders	unresectable squamous cell cancer of the maxillary sinus	0.000321	3.49349				2	TUBB4A,TUBB4B
Se	Cancer, Gastrointestinal Disease, Organismal Injury and Abnormalities, Respiratory Disease	unresectable squamous cell cancer of the oropharynx	0.000321	3.49349				2	TUBB4A,TUBB4B
Se	Cancer, Organismal Injury and Abnormalities, Respiratory Disease	unresectable squamous cell cancer of the supraglottis	0.000321	3.49349				2	TUBB4A,TUBB4B
Se	Infectious Diseases	viral entry by Influenza virus	0.000321	3.49349				2	ATP6V1A,ATP6V1B2
Se	Cancer, Organismal Injury and Abnormalities, Reproductive System Disease	metastatic castration-recurrent prostate cancer	0.000351	3.45469				2	TUBB4A,TUBB4B
Se	Cancer, Organismal Injury and Abnormalities, Respiratory Disease	metastatic progressive ALK negative EGFR sensitizing mutation negative squamous cell lung carcinoma	0.000351	3.45469				2	TUBB4A,TUBB4B
Se	Cancer, Organismal Injury and Abnormalities	visceral metastasis	0.000351	3.45469				2	TUBB4A,TUBB4B
Se	Cancer, Gastrointestinal Disease, Organismal Injury and Abnormalities, Respiratory Disease	metastatic oropharyngeal squamous cell carcinoma	0.000383	3.4168				2	TUBB4A,TUBB4B
Se	Cancer, Gastrointestinal Disease, Organismal Injury and Abnormalities, Respiratory Disease	metastatic squamous cell cancer of the hypopharynx	0.000383	3.4168				2	TUBB4A,TUBB4B
Se	Cancer, Gastrointestinal Disease, Organismal Injury and Abnormalities, Respiratory Disease	recurrent squamous cell cancer of the hypopharynx	0.000383	3.4168				2	TUBB4A,TUBB4B
Se	Cancer, Gastrointestinal Disease, Organismal Injury and Abnormalities, Respiratory Disease	recurrent squamous cell cancer of the oropharynx	0.000383	3.4168				2	TUBB4A,TUBB4B
Se	Organismal Survival	organismal death	0.0136	1.86646		-0.198	bias	9	FABP3,GNAO1,GNB1,GPX4,HBZ,PSMC2,STXBP1,VDAC3,VIM
Se	Cancer, Organismal Injury and Abnormalities	advanced melanoma	0.000416	3.38091				2	TUBB4A,TUBB4B
Se	Cancer, Organismal Injury and Abnormalities	metastatic BRAF V600 mutation negative melanoma	0.000416	3.38091				2	TUBB4A,TUBB4B
Se	Cancer, Organismal Injury and Abnormalities	unresectable BRAF V600 mutation negative melanoma	0.000416	3.38091				2	TUBB4A,TUBB4B
Se	Cellular Assembly and Organization	formation of cytoskeleton	0.00232	2.63451		0.686		4	DPYSL3,GNAO1,GNB1,GPI
Se	Cancer, Organismal Injury and Abnormalities, Reproductive System Disease	locally advanced breast cancer	0.00045	3.34679				2	TUBB4A,TUBB4B
Se	Cancer, Organismal Injury and Abnormalities, Respiratory Disease	malignant pleural mesothelioma	0.00045	3.34679				2	TUBB4A,TUBB4B
Se	Cancer, Organismal Injury and Abnormalities, Respiratory Disease	metastatic progressive ALK fusion negative EGFR sensitizing mutation negative lung adenocarcinoma	0.00045	3.34679				2	TUBB4A,TUBB4B
Se	Cancer, Organismal Injury and Abnormalities, Respiratory Disease	progressive ALK fusion negative EGFR sensitizing mutation negative large cell lung carcinoma	0.00045	3.34679				2	TUBB4A,TUBB4B
Se	Cancer, Gastrointestinal Disease, Organismal Injury and Abnormalities, Respiratory Disease	unresectable nasopharyngeal cancer	0.00045	3.34679				2	TUBB4A,TUBB4B
Se	Cancer, Organismal Injury and Abnormalities, Respiratory Disease	metastatic ALK fusion negative EGFR sensitizing mutation negative large cell lung carcinoma	0.000486	3.31336				2	TUBB4A,TUBB4B
Se	Cancer, Organismal Injury and Abnormalities, Respiratory Disease	metastatic progressive ALK fusion negative EGFR sensitizing mutation negative non-squamous non-small cell lung cancer	0.000486	3.31336				2	TUBB4A,TUBB4B
Se	Cancer, Organismal Injury and Abnormalities, Reproductive System Disease	high risk endometrial carcinoma	0.000523	3.2815				2	TUBB4A,TUBB4B
Se	Cancer, Organismal Injury and Abnormalities, Respiratory Disease	locally advanced non-small-cell lung carcinoma	0.000523	3.2815				2	TUBB4A,TUBB4B
Se	Cancer, Immunological Disease, Organismal Injury and Abnormalities, Reproductive System Disease	lymph node-positive breast cancer	0.000523	3.2815				2	TUBB4A,TUBB4B
Se	Cellular Assembly and Organization, Tissue Development	formation of filaments	0.000294	3.53165		1.172		5	DPYSL3,GNAO1,GNB1,GPI,VIM
Se	Cancer, Endocrine System Disorders, Organismal Injury and Abnormalities	anaplastic thyroid carcinoma	0.000561	3.25104				2	TUBB4A,TUBB4B
Se	Infectious Diseases	Viral Infection	0.00371	2.43063		1.966	bias	8	ATP6V1A,ATP6V1B2,GLUL,GPI,HBZ,STXBP1,TUBB4A,TUBB4B
Se	Cancer, Organismal Injury and Abnormalities, Reproductive System Disease	recurrent endometrial carcinoma	0.000601	3.22113				2	TUBB4A,TUBB4B
Se	Cancer, Organismal Injury and Abnormalities, Reproductive System Disease	metastatic endometrial carcinoma	0.000642	3.19246				2	TUBB4A,TUBB4B
Se	Cancer, Gastrointestinal Disease, Organismal Injury and Abnormalities	esophagogastric junction cancer	0.000684	3.16494				2	TUBB4A,TUBB4B
Se	Cancer, Gastrointestinal Disease, Organismal Injury and Abnormalities, Respiratory Disease	metastatic nasopharyngeal cancer	0.000684	3.16494				2	TUBB4A,TUBB4B
Se	Cancer, Organismal Injury and Abnormalities, Reproductive System Disease	recurrent cervical cancer	0.000684	3.16494				2	TUBB4A,TUBB4B
Se	Cancer, Gastrointestinal Disease, Organismal Injury and Abnormalities, Respiratory Disease	recurrent nasopharyngeal cancer	0.000684	3.16494				2	TUBB4A,TUBB4B
Se	Cellular Assembly and Organization, Cellular Function and Maintenance	microtubule dynamics	0.0119	1.92445		1.969		6	DPYSL3,GNAO1,GPX4,SYN1,TUBB4A,VIM
Se	Cancer, Organismal Injury and Abnormalities	unresectable BRAF V600 positive melanoma	0.000728	3.13787				2	TUBB4A,TUBB4B
Se	Hereditary Disorder, Neurological Disease, Organismal Injury and Abnormalities, Psychological Disorders, Skeletal and Muscular Disorders	Huntington's Disease	1.75e-06	5.75696				8	ATP6V1A,ATP6V1B2,DPYSL3,GNAO1,GNB1,GPI,SDHA,SEPT6
Se	Cancer, Organismal Injury and Abnormalities, Reproductive System Disease	advanced stage HER2-negative breast cancer	0.000773	3.11182				2	TUBB4A,TUBB4B
Se	Connective Tissue Disorders, Developmental Disorder, Hereditary Disorder, Inflammatory Disease, Metabolic Disease, Organismal Injury and Abnormalities, Skeletal and Muscular Disorders	gout	0.000773	3.11182				2	TUBB4A,TUBB4B
Se	Cancer, Organismal Injury and Abnormalities, Respiratory Disease	metastatic advanced non-small-cell lung cancer	0.000773	3.11182				2	TUBB4A,TUBB4B
Se	Cancer, Organismal Injury and Abnormalities, Reproductive System Disease	metastatic cervical cancer	0.000819	3.08672				2	TUBB4A,TUBB4B
Se	Cancer, Endocrine System Disorders, Neurological Disease, Organismal Injury and Abnormalities	pheochromocytoma	3.96e-05	4.4023				3	SDHA,TUBB4A,TUBB4B
Se	Cancer, Organismal Injury and Abnormalities, Respiratory Disease	stage 3B non-small-cell lung carcinoma	0.000866	3.06248				2	TUBB4A,TUBB4B
Se	Cancer, Organismal Injury and Abnormalities	mesothelioma	0.000209	3.67985				3	TUBB4A,TUBB4B,VIM
Se	Cardiovascular Disease, Neurological Disease	cerebrovascular dysfunction	0.000253	3.59688				4	FABP3,TUBB4A,TUBB4B,VIM
Se	Neurological Disease	Ohtahara syndrome	0.00107	2.97062				2	GNAO1,STXBP1
Se	Cancer, Endocrine System Disorders, Organismal Injury and Abnormalities	metastatic thyroid carcinoma	0.00107	2.97062				2	TUBB4A,TUBB4B
Se	Cellular Growth and Proliferation	proliferation of cells	0.00111	2.95468		0.792		14	DPYSL3,FABP3,GLUL,GNAO1,GNB1,GPI,GPX4,PSMC2,SEPT6,SYN1,TRAP1,TUBB4B,VIM,YWHAQ
Se	Cancer, Endocrine System Disorders, Organismal Injury and Abnormalities	epithelial thyroid cancer	0.000414	3.383				4	ATP6V1A,TUBB4A,TUBB4B,VIM
Se	Cancer, Organismal Injury and Abnormalities	invasive carcinoma	0.00042	3.37675				4	TUBB4A,TUBB4B,VIM,YWHAQ
Se	Connective Tissue Disorders, Developmental Disorder, Hereditary Disorder, Organismal Injury and Abnormalities, Skeletal and Muscular Disorders	Sedaghatian type spondylometaphyseal dysplasia	0.00121	2.91721				1	GPX4
Se	Hereditary Disorder, Neurological Disease, Organismal Injury and Abnormalities	X-linked epilepsy with variable learning disabilities and behavior disorders	0.00121	2.91721				1	SYN1
Se	Cardiovascular System Development and Function, Organismal Development, Tissue Morphology	area of left common carotid artery	0.00121	2.91721				1	VIM
Se	Cardiovascular System Development and Function, Organismal Development, Tissue Morphology	area of right common carotid artery	0.00121	2.91721				1	VIM
Se	Developmental Disorder, Neurological Disease, Organismal Injury and Abnormalities	asymmetric polymicrogyria	0.00121	2.91721				1	TUBB2B
Se	Hereditary Disorder, Neurological Disease, Organismal Injury and Abnormalities	autosomal dominant torsion dystonia type 4	0.00121	2.91721				1	TUBB4A
Se	Cellular Development, Reproductive System Development and Function	cell quality of sperm	0.00121	2.91721				1	GPX4
Se	Cell Cycle, Cell-To-Cell Signaling and Interaction, Cellular Growth and Proliferation	contact growth inhibition of fibrosarcoma cell lines	0.00121	2.91721				1	GPI
Se	Cell-To-Cell Signaling and Interaction, Cellular Assembly and Organization, Cellular Development, Cellular Function and Maintenance, Cellular Growth and Proliferation, Nervous System Development and Function, Tissue Development	delay in formation of synapse	0.00121	2.91721				1	SYN1
Se	Cell Morphology, Cellular Assembly and Organization, Cellular Development, Cellular Growth and Proliferation, Nervous System Development and Function, Tissue Development	delay in outgrowth of axons	0.00121	2.91721				1	SYN1
Se	Cardiovascular System Development and Function, Tissue Morphology	diameter of left common carotid artery	0.00121	2.91721				1	VIM
Se	Cardiovascular System Development and Function, Tissue Morphology	diameter of right common carotid artery	0.00121	2.91721				1	VIM
Se	Endocrine System Disorders, Organismal Injury and Abnormalities, Reproductive System Disease, Tissue Morphology	disorganization of seminiferous epithelium	0.00121	2.91721				1	GPX4
Se	Cellular Assembly and Organization, Cellular Compromise	disruption of vimentin filaments	0.00121	2.91721				1	VIM
Se	Hereditary Disorder, Neurological Disease, Organismal Injury and Abnormalities	early infantile epileptic encephalopathy type 17	0.00121	2.91721				1	GNAO1
Se	Hereditary Disorder, Neurological Disease, Organismal Injury and Abnormalities	early infantile epileptic encephalopathy type 4	0.00121	2.91721				1	STXBP1
Se	Cellular Assembly and Organization, Cellular Function and Maintenance, Molecular Transport	exocytosis of chromaffin vesicles	0.00121	2.91721				1	STXBP1
Se	Developmental Disorder, Hereditary Disorder, Metabolic Disease, Organismal Injury and Abnormalities	glutamine synthase deficiency	0.00121	2.91721				1	GLUL
Se	Neurological Disease, Organ Morphology, Organismal Injury and Abnormalities, Psychological Disorders	hypomyelinating leukodystrophy type 6	0.00121	2.91721				1	TUBB4A
Se	Cancer, Endocrine System Disorders, Organismal Injury and Abnormalities, Tumor Morphology	invasion of papillary thyroid carcinoma	0.00121	2.91721				1	VIM
Se	Cell Morphology, Cellular Function and Maintenance, Nervous System Development and Function, Organ Morphology, Organismal Development, Tissue Morphology	length of cortical neurons	0.00121	2.91721				1	DPYSL3
Se	Lipid Metabolism, Small Molecule Biochemistry	metabolism of 12(S)-hydroxyeicosatetraenoic acid	0.00121	2.91721				1	GPX4
Se	Cancer, Endocrine System Disorders, Organismal Injury and Abnormalities	metastasis of papillary thyroid carcinoma	0.00121	2.91721				1	VIM
Se	Cell Morphology, Cellular Assembly and Organization, DNA Replication, Recombination, and Repair	morphology of nuclear matrix	0.00121	2.91721				1	VIM
Se	Cell Morphology, Nervous System Development and Function, Tissue Morphology	morphology of presynaptic terminals	0.00121	2.91721				1	SYN1
Se	Cardiovascular Disease, Cell Death and Survival, Connective Tissue Disorders, Developmental Disorder, Hematological Disease, Hereditary Disorder, Neurological Disease, Organismal Injury and Abnormalities	nonspherocytic hemolytic anemia and neurologic deficits due to glucose phosphate isomerase deficiency	0.00121	2.91721				1	GPI
Se	Cancer, Endocrine System Disorders, Hereditary Disorder, Organismal Injury and Abnormalities	paragangliomas type 5	0.00121	2.91721				1	SDHA
Se	Hereditary Disorder, Neurological Disease, Organismal Injury and Abnormalities	pyridoxine-dependent epilepsy	0.00121	2.91721				1	ALDH7A1
Se	Cellular Assembly and Organization, Cellular Function and Maintenance, Organ Morphology, Tissue Morphology, Visual System Development and Function	quantity of connecting cilia	0.00121	2.91721				1	GPX4
Se	Cell Death and Survival	release of Cytochrome C	0.00121	2.91721				1	GPX4
Se	Cell Morphology	shape of fibrosarcoma cell lines	0.00121	2.91721				1	GPI
Se	Embryonic Development, Tissue Morphology	size of accessory olfactory bulb	0.00121	2.91721				1	GNAO1
Se	Cell Morphology, Cellular Assembly and Organization, Nervous System Development and Function, Tissue Morphology	size of mossy fiber boutons	0.00121	2.91721				1	SYN1
Se	Cancer, Endocrine System Disorders, Gastrointestinal Disease, Organismal Injury and Abnormalities	stage 2b moderately-differentiated pancreatic cancer	0.00121	2.91721				1	GPI
Se	Cancer, Endocrine System Disorders, Gastrointestinal Disease, Organismal Injury and Abnormalities	stage 2b poorly differentiated pancreatic cancer	0.00121	2.91721				1	GPI
Se	Developmental Disorder, Neurological Disease, Organismal Injury and Abnormalities	symmetric polymicrogyria	0.00121	2.91721				1	TUBB2B
Se	Lipid Metabolism, Molecular Transport, Small Molecule Biochemistry	uptake of 20:4(n-6) fatty acids	0.00121	2.91721				1	FABP3
Se	Amino Acid Metabolism, Small Molecule Biochemistry	utilization of L-glutamic acid	0.00121	2.91721				1	GLUL
Se	Cancer, Connective Tissue Disorders, Organismal Injury and Abnormalities, Skeletal and Muscular Disorders	metastatic bone cancer	0.00124	2.90658				2	TUBB4A,TUBB4B
Se	Cell-To-Cell Signaling and Interaction, Cellular Function and Maintenance, Nervous System Development and Function	paired-pulse facilitation of synapse	0.00135	2.86967				2	SYN1,VDAC3
Se	Connective Tissue Disorders, Inflammatory Disease, Skeletal and Muscular Disorders	knee osteoarthritis	0.00141	2.85078				2	TUBB4A,TUBB4B
Se	Neurological Disease, Ophthalmic Disease, Organismal Injury and Abnormalities, Psychological Disorders	progressive supranuclear palsy	0.00141	2.85078				2	TUBB4A,TUBB4B
Se	Behavior	social exploration	0.00141	2.85078				2	GNAO1,SYN1
Se	Cancer, Immunological Disease, Organismal Injury and Abnormalities	thymic carcinoma	0.00141	2.85078				2	TUBB4A,TUBB4B
Se	Cancer, Organismal Injury and Abnormalities	primary peritoneal cancer	0.00154	2.81248				2	TUBB4A,TUBB4B
Se	DNA Replication, Recombination, and Repair, Nucleic Acid Metabolism, Small Molecule Biochemistry	hydrolysis of nucleotide	0.000555	3.25571				3	GNAO1,GNB1,PSMC2
Se	Cancer, Organismal Injury and Abnormalities, Reproductive System Disease	fallopian tube cancer	0.00167	2.77728				2	TUBB4A,TUBB4B
Se	Cancer, Organismal Injury and Abnormalities, Reproductive System Disease	uterine sarcoma	0.00187	2.72816				2	TUBB4A,TUBB4B
Se	Cancer, Organismal Injury and Abnormalities, Respiratory Disease	stage 4 non-small-cell lung carcinoma	0.00194	2.7122				2	TUBB4A,TUBB4B
Se	Cell-To-Cell Signaling and Interaction, Nervous System Development and Function	synaptic transmission of synapse	0.00201	2.6968				2	STXBP1,VDAC3
Se	Neurological Disease, Organismal Injury and Abnormalities	brain atrophy	0.00209	2.67985				2	TUBB4A,VIM
Se	Cancer, Organismal Injury and Abnormalities	stage 4 metastatic solid tumor	0.00209	2.67985				2	TUBB4A,TUBB4B
Se	Cancer, Organismal Injury and Abnormalities	invasive adenocarcinoma	0.00058	3.23657				3	TUBB4A,TUBB4B,VIM
Se	Cardiovascular Disease	pericardial effusion	0.00224	2.64975				2	TUBB4A,TUBB4B
Se	Connective Tissue Disorders, Inflammatory Disease, Skeletal and Muscular Disorders	rheumatic disease of joint	0.000699	3.15552				3	GPI,TUBB4A,TUBB4B
Se	Cancer, Cardiovascular Disease, Dermatological Diseases and Conditions, Hereditary Disorder, Organismal Injury and Abnormalities	Carney complex type 1	0.00242	2.61618				1	VIM
Se	Cell Death and Survival	apoptosis of primary spermatocytes	0.00242	2.61618				1	GPX4
Se	Cell-To-Cell Signaling and Interaction, Cellular Assembly and Organization, Nervous System Development and Function	association of synaptic vesicles	0.00242	2.61618				1	SYN1
Se	Cancer, Gastrointestinal Disease, Hepatic System Disease, Organismal Injury and Abnormalities	beta-catenin activating mutation positive hepatocellular adenoma	0.00242	2.61618				1	GLUL
Se	Cell Morphology, Cellular Assembly and Organization, Cellular Function and Maintenance	formation of microtentacles	0.00242	2.61618				1	VIM
Se	Digestive System Development and Function, Embryonic Development, Organ Development, Organismal Development, Skeletal and Muscular System Development and Function, Tissue Development	formation of mylohyoid muscle	0.00242	2.61618				1	VIM
Se	Amino Acid Metabolism, Small Molecule Biochemistry	inactivation of L-glutamic acid	0.00242	2.61618				1	GLUL
Se	Cellular Assembly and Organization	membrane fusion of proteoliposomes	0.00242	2.61618				1	STXBP1
Se	Cellular Movement	migration of AT2 cells	0.00242	2.61618				1	VIM
Se	Cell Cycle	neurite outgrowth stage of dorsal root ganglion cells	0.00242	2.61618				1	VIM
Se	Cell-To-Cell Signaling and Interaction, Nervous System Development and Function	posttetanic potentiation of hippocampal neurons	0.00242	2.61618				1	SYN1
Se	Cell-To-Cell Signaling and Interaction, Nervous System Development and Function	reactivation of astrocytes	0.00242	2.61618				1	VIM
Se	Cell-To-Cell Signaling and Interaction, Nervous System Development and Function	synaptic transmission of neocortical neurons	0.00242	2.61618				1	STXBP1
Se	Post-Translational Modification	thiolation of protein	0.00242	2.61618				1	GPX4
Se	Cellular Assembly and Organization	transport of nucleus	0.00242	2.61618				1	GPI
Se	Cancer, Organismal Injury and Abnormalities, Renal and Urological Disease	Wilm's tumorigenesis	0.00247	2.6073				2	TUBB4A,TUBB4B
Se	DNA Replication, Recombination, and Repair, Developmental Disorder, Hereditary Disorder, Organismal Injury and Abnormalities	Down's syndrome	0.00255	2.59346				2	SYN1,TUBB4A
Se	Cancer, Organismal Injury and Abnormalities	adult solid tumor	0.00255	2.59346				2	TUBB4A,TUBB4B
Se	Cell Signaling, DNA Replication, Recombination, and Repair, Nucleic Acid Metabolism, Small Molecule Biochemistry	hydrolysis of GTP	0.00306	2.51428				2	GNAO1,GNB1
Se	Cancer, Endocrine System Disorders, Organismal Injury and Abnormalities	neuroendocrine tumor	0.000837	3.07727				4	ALDOC,SDHA,TUBB4A,TUBB4B
Se	Neurological Disease	epilepsy	0.00104	2.98297				4	ALDH7A1,GNAO1,STXBP1,SYN1
Se	Cell Signaling, Nucleic Acid Metabolism, Small Molecule Biochemistry	binding of GTP	0.00315	2.50169				2	GNAO1,GNB1
Se	Behavior	aggressive behavior	0.00324	2.48945				2	GNAO1,SYN1
Se	Cell Signaling, Nucleic Acid Metabolism, Small Molecule Biochemistry	binding of guanosine 5'-O-(3-thiotriphosphate)	0.00342	2.46597				2	GNAO1,GNB1
Se	Cell-To-Cell Signaling and Interaction, Molecular Transport, Small Molecule Biochemistry	release of neurotransmitter	0.00114	2.9431				3	GLUL,STXBP1,SYN1
Se	Cancer, Cardiovascular Disease, Organismal Injury and Abnormalities	angiosarcoma	0.00361	2.44249				2	TUBB4A,TUBB4B
Se	Cancer, Gastrointestinal Disease, Organismal Injury and Abnormalities	Carney triad	0.00363	2.44009				1	SDHA
Se	Cell Morphology, Nervous System Development and Function, Tissue Morphology	area of growth cone	0.00363	2.44009				1	DPYSL3
Se	Amino Acid Metabolism, Post-Translational Modification, Small Molecule Biochemistry	conversion of L-glutamic acid	0.00363	2.44009				1	GLUL
Se	Amino Acid Metabolism, Post-Translational Modification, Small Molecule Biochemistry	conversion of glutamine	0.00363	2.44009				1	GLUL
Se	Cell Morphology, Cellular Compromise	deformation of red blood cells	0.00363	2.44009				1	HBZ
Se	Cellular Compromise	disassembly of intermediate filaments	0.00363	2.44009				1	VIM
Se	Cellular Development, Cellular Growth and Proliferation	formation of embryonic cancer cell lines	0.00363	2.44009				1	GNAO1
Se	Cardiovascular System Development and Function	fractional shortening of cardiomyocytes	0.00363	2.44009				1	FABP3
Se	Organismal Functions	healing of cornea	0.00363	2.44009				1	VIM
Se	Cardiovascular Disease, Cardiovascular System Development and Function, Organismal Injury and Abnormalities, Tissue Morphology	permeability of endothelial barrier	0.00363	2.44009				1	GNAO1
Se	Infectious Diseases	replication of human T-lymphotropic virus type 1	0.00363	2.44009				1	HBZ
Se	Nervous System Development and Function	sensory function of olfactory receptor neurons	0.00363	2.44009				1	GNAO1
Se	Cancer, Gastrointestinal Disease, Organismal Injury and Abnormalities	sporadic c-KIT mutation negative PDGFRA mutation negative gastrointestinal stromal tumor	0.00363	2.44009				1	SDHA
Se	Developmental Disorder, Hereditary Disorder, Metabolic Disease, Organismal Injury and Abnormalities	succinate-coenzyme q reductase deficiency	0.00363	2.44009				1	SDHA
Se	Amino Acid Metabolism, Small Molecule Biochemistry	synthesis of glutamine	0.00363	2.44009				1	GLUL
Se	Lipid Metabolism, Molecular Transport, Small Molecule Biochemistry	uptake of 15-(4-iodophenyl)-3-methylpentadecanoic acid	0.00363	2.44009				1	FABP3
Se	Cardiovascular Disease, Neurological Disease	stroke	0.00118	2.92812				3	FABP3,TUBB4A,TUBB4B
Se	Amino Acid Metabolism, Cell-To-Cell Signaling and Interaction, Molecular Transport, Small Molecule Biochemistry	release of L-glutamic acid	0.004	2.39794				2	FABP3,SYN1
Se	Cancer, Organismal Injury and Abnormalities, Reproductive System Disease	invasive breast carcinoma	0.00159	2.7986				3	TUBB4A,TUBB4B,YWHAQ
Se	Cancer, Hematological Disease, Immunological Disease, Organismal Injury and Abnormalities	chronic B-cell leukemia	0.0041	2.38722				2	TUBB4A,TUBB4B
Se	Cancer, Immunological Disease, Organismal Injury and Abnormalities	lymphatic node tumor	0.0021	2.67778				5	ATP6V1B2,GNB1,TUBB4A,TUBB4B,VIM
Se	Cellular Development, Cellular Growth and Proliferation, Reproductive System Development and Function	proliferation of gonadal cell lines	0.00452	2.34486				2	GNAO1,TUBB4B
Se	Cell Morphology, Cellular Assembly and Organization, Cellular Development, Cellular Growth and Proliferation, Nervous System Development and Function, Tissue Development	outgrowth of neurites	0.00309	2.51004				4	DPYSL3,GNAO1,SYN1,VIM
Se	Cellular Compromise, Ophthalmic Disease, Organismal Injury and Abnormalities, Tissue Morphology	degeneration of photoreceptors	0.00463	2.33442				2	GNB1,GPX4
Se	Cell-To-Cell Signaling and Interaction, Nervous System Development and Function	neurotransmission	0.00311	2.50724				4	GNAO1,STXBP1,SYN1,VDAC3
Se	Cell Morphology	morphology of cells	0.00349	2.45717				9	ATP6V1B2,DPYSL3,GNAO1,GPI,GPX4,HBZ,SYN1,VDAC3,VIM
Se	Cellular Compromise	acidification of vacuole	0.00484	2.31515				1	ATP6V1B2
Se	Cell-To-Cell Signaling and Interaction, Endocrine System Development and Function	activation of beta islet cells	0.00484	2.31515				1	STXBP1
Se	Amino Acid Metabolism, Small Molecule Biochemistry	catabolism of L-glutamic acid	0.00484	2.31515				1	GLUL
Se	Cell Morphology, Connective Tissue Development and Function	contraction of fibroblast cell lines	0.00484	2.31515				1	VIM
Se	Lipid Metabolism, Small Molecule Biochemistry	esterification of triacylglycerol	0.00484	2.31515				1	FABP3
Se	Embryonic Development, Nervous System Development and Function, Organ Development, Organismal Development, Tissue Development	formation of barrel cortex	0.00484	2.31515				1	STXBP1
Se	Cell-To-Cell Signaling and Interaction	growth of focal adhesions	0.00484	2.31515				1	VIM
Se	Cancer, Endocrine System Disorders, Organismal Injury and Abnormalities	invasive papillary thyroid carcinoma	0.00484	2.31515				1	VIM
Se	Drug Metabolism, Lipid Metabolism, Small Molecule Biochemistry	metabolism of prostaglandin E2	0.00484	2.31515				1	GPX4
Se	Carbohydrate Metabolism, Small Molecule Biochemistry	modification of glucose-6-phosphate	0.00484	2.31515				1	GPI
Se	Neurological Disease	pathological denervation of neuromuscular junctions	0.00484	2.31515				1	DPYSL3
Se	Cellular Assembly and Organization, Cellular Compromise	retraction of pseudopodia	0.00484	2.31515				1	GPI
Se	Cellular Assembly and Organization, Cellular Function and Maintenance, Tissue Development	formation of actin stress fibers	0.00461	2.3363				3	GNAO1,GNB1,GPI
Se	Cell Death and Survival, Cellular Compromise, Neurological Disease, Tissue Morphology	neurodegeneration of axons	0.00506	2.29585				2	DPYSL3,STXBP1
Se	Cell Death and Survival, Cellular Compromise, Neurological Disease, Tissue Morphology	degeneration of neurons	0.00465	2.33255				3	DPYSL3,FABP3,STXBP1
Se	Cardiovascular Disease, Organismal Injury and Abnormalities	acute coronary syndrome	0.0047	2.3279				3	FABP3,TUBB4A,TUBB4B
Se	Cell Morphology, Nervous System Development and Function, Tissue Morphology	size of neurons	0.00564	2.24872				2	DPYSL3,SYN1
Se	Cell Morphology	contraction of cells	0.006	2.22185				2	GNB1,VIM
Se	Neurological Disease	leukoencephalopathy	0.006	2.22185				2	SDHA,TUBB4A
Se	Amino Acid Metabolism, Molecular Transport, Small Molecule Biochemistry	accumulation of L-glutamic acid	0.00605	2.21824				1	GLUL
Se	Cell Morphology, Cellular Compromise	binucleation of cervical cancer cell lines	0.00605	2.21824				1	SEPT6
Se	Cellular Assembly and Organization	clustering of synaptic vesicles	0.00605	2.21824				1	SYN1
Se	Cellular Assembly and Organization, Cellular Function and Maintenance	cross-linkage of microtubules	0.00605	2.21824				1	SYN1
Se	Cell Morphology	length of filopodia	0.00605	2.21824				1	DPYSL3
Se	Cell Signaling, Molecular Transport, Nucleic Acid Metabolism, Small Molecule Biochemistry	mobilization of cyclic AMP	0.00605	2.21824				1	GNAO1
Se	Neurological Disease, Organismal Injury and Abnormalities	neurodegeneration of thalamus	0.00605	2.21824				1	VIM
Se	Cell-To-Cell Signaling and Interaction, Cellular Movement	recruitment of leukemia cell lines	0.00605	2.21824				1	VIM
Se	Molecular Transport, Nucleic Acid Metabolism, Small Molecule Biochemistry	transport of adenine	0.00605	2.21824				1	VDAC3
Se	Cancer, Endocrine System Disorders, Organismal Injury and Abnormalities, Respiratory Disease	small cell lung cancer	0.00637	2.19586				2	TUBB4A,TUBB4B
Se	Cell-To-Cell Signaling and Interaction, Nervous System Development and Function	synaptic transmission of cells	0.00484	2.31515				3	STXBP1,SYN1,VDAC3
Se	Cardiovascular Disease, Organismal Injury and Abnormalities, Skeletal and Muscular Disorders	acute myocardial infarction	0.00675	2.1707				2	TUBB4A,TUBB4B
Se	Cellular Assembly and Organization, Cellular Function and Maintenance	organization of cytoskeleton	0.00695	2.15802	Increased	2.2		7	DPYSL3,GNAO1,GPI,GPX4,SYN1,TUBB4A,VIM
Se	Cancer, Endocrine System Disorders, Organismal Injury and Abnormalities	Carney-Stratakis syndrome	0.00725	2.13966				1	SDHA
Se	Organismal Development	abnormal size of body	0.00725	2.13966				1	GNAO1
Se	Cellular Compromise	acidification of endosomes	0.00725	2.13966				1	VIM
Se	Cell Morphology, Cellular Assembly and Organization, Cellular Development, Cellular Function and Maintenance, Cellular Growth and Proliferation, Nervous System Development and Function, Organ Morphology, Tissue Development	branching of cortical neurons	0.00725	2.13966				1	DPYSL3
Se	Cell-To-Cell Signaling and Interaction	cell-cell adhesion of breast cell lines	0.00725	2.13966				1	GPI
Se	Connective Tissue Disorders, Inflammatory Disease, Skeletal and Muscular Disorders	experimentally-induced arthritis of ankle joint	0.00725	2.13966				1	GPI
Se	Carbohydrate Metabolism, Molecular Transport, Small Molecule Biochemistry	flux of D-glucose	0.00725	2.13966				1	GPI
Se	Cellular Assembly and Organization	formation of punctate structures	0.00725	2.13966				1	VIM
Se	Cell Signaling, Molecular Transport, Nucleic Acid Metabolism, Small Molecule Biochemistry	guanine nucleotide exchange of GDP	0.00725	2.13966				1	GNAO1
Se	Cellular Function and Maintenance, Small Molecule Biochemistry	homeostasis of H+	0.00725	2.13966				1	ATP6V1B2
Se	Carbohydrate Metabolism, Small Molecule Biochemistry	metabolism of D-fructose	0.00725	2.13966				1	ALDOC
Se	Carbohydrate Metabolism, Small Molecule Biochemistry	metabolism of glucose-6-phosphate	0.00725	2.13966				1	GPI
Se	Lipid Metabolism, Molecular Transport, Small Molecule Biochemistry	movement of cholesterol	0.00725	2.13966				1	VIM
Se	Inflammatory Disease, Inflammatory Response, Neurological Disease	neuroinflammation of brain	0.00725	2.13966				1	VIM
Se	Cellular Movement	invasion of prostate cancer cell lines	0.00727	2.13847				2	VIM,YWHAQ
Se	Cell Morphology, Cellular Assembly and Organization, Cellular Development, Cellular Growth and Proliferation, Nervous System Development and Function, Tissue Development	outgrowth of axons	0.00753	2.12321				2	SYN1,VIM
Se	Neurological Disease, Psychological Disorders, Skeletal and Muscular Disorders	Parkinson's disease	0.00523	2.2815				3	SYN1,TUBB2B,VIM
Se	Cancer, Neurological Disease, Organismal Injury and Abnormalities	neuroblastoma	0.00794	2.10018				2	TUBB4A,TUBB4B
Se	Behavior	emotional behavior	0.00563	2.24949				3	GNAO1,SYN1,VDAC3
Se	Organismal Injury and Abnormalities, Reproductive System Disease	disorder of pregnancy	0.00654	2.18442				4	ATP6V1A,DPYSL3,TUBB4A,TUBB4B
Se	Cancer, Organismal Injury and Abnormalities, Respiratory Disease	non small cell lung adenocarcinoma	0.00782	2.10679				4	ALDOC,GPI,TUBB4A,TUBB4B
Se	Organ Morphology, Respiratory System Development and Function, Tissue Morphology	abnormal morphology of tracheal ciliated epithelium	0.00845	2.07314				1	VDAC3
Se	Metabolic Disease, Neurological Disease	amyloid load of hippocampus	0.00845	2.07314				1	VIM
Se	Cellular Development, Cellular Growth and Proliferation, Embryonic Development, Organismal Development, Tissue Development	development of endodermal cells	0.00845	2.07314				1	GNAO1
Se	Cell Signaling, Molecular Transport, Nucleic Acid Metabolism, Small Molecule Biochemistry	guanine nucleotide exchange of GTP	0.00845	2.07314				1	GNAO1
Se	Cellular Assembly and Organization, Cellular Development, Nervous System Development and Function, Tissue Development	maturation of synaptic vesicles	0.00845	2.07314				1	STXBP1
Se	Carbohydrate Metabolism	metabolism of fructose-1,6-diphosphate	0.00845	2.07314				1	ALDOC
Se	Cell Morphology	morphology of thyroid tumor cell lines	0.00845	2.07314				1	VIM
Se	Organismal Injury and Abnormalities, Reproductive System Disease	subfertility	0.00845	2.07314				1	GPX4
Se	Cancer, Gastrointestinal Disease, Organismal Injury and Abnormalities	metastatic gastrointestinal tract cancer	0.00799	2.09745				3	GLUL,TUBB4A,TUBB4B
Se	Infectious Diseases, Inflammatory Disease, Respiratory Disease	severe acute respiratory syndrome	0.00923	2.0348				2	GLUL,TUBB4B
Se	Cell Morphology, Cellular Assembly and Organization	abnormal morphology of axonemes	0.00966	2.01502				1	VDAC3
Se	Developmental Disorder, Neurological Disease	dystrophy of neurites	0.00966	2.01502				1	VIM
Se	Dermatological Diseases and Conditions	scratch lesion	0.00966	2.01502				1	VIM
Se	Cancer, Hematological Disease, Immunological Disease, Organismal Injury and Abnormalities	diffuse B-cell lymphoma	0.00812	2.09044				3	GNB1,TUBB4A,TUBB4B
Se	Cardiovascular Disease, Organismal Injury and Abnormalities, Skeletal and Muscular Disorders	atrial fibrillation	0.00982	2.00789				2	TUBB4A,TUBB4B
Se	Cellular Function and Maintenance	internalization by tumor cell lines	0.0101	1.99568				2	ATP6V1B2,VIM
Se	Carbohydrate Metabolism	metabolism of monosaccharide	0.0108	1.96658				2	ALDOC,GPI
Se	Cell Cycle	G1/S phase transition of colorectal cancer cell lines	0.0109	1.96257				1	YWHAQ
Se	Small Molecule Biochemistry	catabolism of aldehyde	0.0109	1.96257				1	GPI
Se	Amino Acid Metabolism, Molecular Transport, Small Molecule Biochemistry	concentration of phosphocreatine	0.0109	1.96257				1	FABP3
Se	Cellular Compromise, Inflammatory Response	degranulation of blood platelets	0.0109	1.96257				1	STXBP1
Se	Cell-To-Cell Signaling and Interaction, Cellular Assembly and Organization, Nervous System Development and Function	fusion of synaptic vesicles	0.0109	1.96257				1	STXBP1
Se	Small Molecule Biochemistry	quantity of uric acid in blood	0.0109	1.96257				1	VIM
Se	Behavior	social transmission of food preference	0.0109	1.96257				1	SYN1
Se	Cancer, Endocrine System Disorders, Organismal Injury and Abnormalities, Reproductive System Disease	advanced epithelial ovarian cancer	0.0109	1.96257				2	TUBB4A,TUBB4B
Se	Neurological Disease	progressive motor neuropathy	0.00836	2.07779				4	FABP3,SYN1,TUBB2B,VIM
Se	Cancer, Organismal Injury and Abnormalities	metastasis	0.00869	2.06098				5	GLUL,GPI,TUBB4A,TUBB4B,VIM
Se	Cancer, Neurological Disease, Organismal Injury and Abnormalities	gliomatosis	0.00972	2.01233				5	ALDOC,ATP6V1A,GNAO1,SDHA,YWHAQ
Se	Lipid Metabolism, Small Molecule Biochemistry	homeostasis of phospholipid	0.0121	1.91721				1	FABP3
Se	Lipid Metabolism, Small Molecule Biochemistry	metabolism of succinic acid	0.0121	1.91721				1	SDHA
Se	Cellular Assembly and Organization	quantity of intermediate filaments	0.0121	1.91721				1	VIM
Se	Cancer, Hematological Disease, Immunological Disease, Organismal Injury and Abnormalities	non-Hodgkin's disease	0.011	1.95861				4	ATP6V1B2,GNB1,TUBB4A,TUBB4B
Se	Amino Acid Metabolism, Molecular Transport, Small Molecule Biochemistry	transport of amino acids	0.0127	1.8962				2	GLUL,STXBP1
Se	Cell Signaling	acetylcholine receptor signaling, muscarinic pathway	0.0133	1.87615				1	GNB1
Se	Cell Morphology, Embryonic Development	cell spreading of embryonic cell lines	0.0133	1.87615				1	VIM
Se	Amino Acid Metabolism, Protein Synthesis, Small Molecule Biochemistry	incorporation of selenocysteine	0.0133	1.87615				1	GPX4
Se	Cancer, Organismal Injury and Abnormalities, Respiratory Disease	non-small cell lung cancer	0.0113	1.94692				5	ALDOC,GPI,TUBB4A,TUBB4B,VIM
Se	Protein Synthesis	homo-oligomerization of protein	0.0136	1.86646				2	DPYSL3,GLUL
Se	Organismal Injury and Abnormalities	Cytosis	0.0126	1.89963				3	HBZ,TUBB4A,TUBB4B
Se	Cancer, Connective Tissue Disorders, Organismal Injury and Abnormalities, Skeletal and Muscular Disorders	bone sarcoma	0.0141	1.85078				2	TUBB4A,TUBB4B
Se	Cellular Assembly and Organization	cross-linkage of actin filaments	0.0145	1.83863				1	SYN1
Se	Cellular Assembly and Organization, Cellular Function and Maintenance, Tissue Development	formation of intermediate filaments	0.0145	1.83863				1	VIM
Se	Cellular Assembly and Organization, Cellular Compromise, Cellular Function and Maintenance	instability of microtubules	0.0145	1.83863				1	TUBB4A
Se	Cellular Movement	invasion of thyroid tumor cell lines	0.0145	1.83863				1	VIM
Se	Nervous System Development and Function, Organ Morphology	thickness of cerebral cortex	0.0145	1.83863				1	VIM
Se	Amino Acid Metabolism, Molecular Transport, Small Molecule Biochemistry	transport of glycine	0.0145	1.83863				1	STXBP1
Se	Lipid Metabolism, Molecular Transport, Small Molecule Biochemistry	transport of palmitic acid	0.0145	1.83863				1	FABP3
Se	Cancer, Hereditary Disorder, Organismal Injury and Abnormalities	hereditary neoplastic syndrome	0.0148	1.82974				2	SDHA,VIM
Se	Cell Morphology, Nervous System Development and Function	morphology of central nervous system cells	0.0148	1.82974				2	SYN1,VIM
Se	Cellular Function and Maintenance	engulfment of tumor cell lines	0.0156	1.80688				2	ATP6V1B2,VIM
Se	Cancer, Endocrine System Disorders, Organismal Injury and Abnormalities, Reproductive System Disease	pituitary gland adenoma	0.0156	1.80688				2	ALDOC,TUBB4A
Se	Cell Death and Survival	cell death	0.0156	1.80688		-1.146		11	ALDOC,DPYSL3,FABP3,GNAO1,GPI,GPX4,SDHA,STXBP1,TRAP1,VIM,YWHAQ
Se	Cell-To-Cell Signaling and Interaction, Drug Metabolism, Molecular Transport, Small Molecule Biochemistry	efflux of dopamine	0.0156	1.80688				1	GNAO1
Se	Cell Morphology, Cellular Function and Maintenance, Nervous System Development and Function, Tissue Morphology	length of axons	0.0156	1.80688				1	DPYSL3
Se	Cell-To-Cell Signaling and Interaction, Cellular Assembly and Organization, Cellular Function and Maintenance, Molecular Transport	priming of synaptic vesicles	0.0156	1.80688				1	STXBP1
Se	Cancer, Organismal Injury and Abnormalities, Reproductive System Disease	mammary tumor	0.0162	1.79048				7	ALDOC,GLUL,GNAO1,TUBB4A,TUBB4B,VDAC3,YWHAQ
Se	Lipid Metabolism, Small Molecule Biochemistry	fatty acid metabolism	0.0137	1.86328				4	FABP3,GPX4,SDHA,VIM
Se	Protein Degradation, Protein Synthesis	stabilization of protein	0.0167	1.77728				2	PSMD8,STXBP1
Se	Neurological Disease	catalepsy	0.0168	1.77469				1	FABP3
Se	Cellular Movement	chemotaxis of macrophage cancer cell lines	0.0168	1.77469				1	GNB1
Se	Organismal Injury and Abnormalities	formation of scar tissue	0.0168	1.77469				1	VIM
Se	Cell-To-Cell Signaling and Interaction, Neurological Disease	loss of synapse	0.0168	1.77469				1	VIM
Se	Cell Morphology	morphology of neuroblastoma cell lines	0.0168	1.77469				1	GNAO1
Se	Cellular Function and Maintenance, Hematological System Development and Function	presence of red blood cells	0.0168	1.77469				1	HBZ
Se	Behavior	taste discrimination	0.0168	1.77469				1	GNB1
Se	Cell-To-Cell Signaling and Interaction, Cellular Assembly and Organization, Cellular Function and Maintenance	formation of focal adhesions	0.0179	1.74715				2	GNB1,VIM
Se	Connective Tissue Disorders, Inflammatory Disease, Skeletal and Muscular Disorders	arthritis	0.0164	1.78516				5	GLUL,GPI,TUBB4A,TUBB4B,VIM
Se	Cell Morphology, Organ Morphology, Reproductive System Development and Function	abnormal morphology of mitochondrial sheath	0.018	1.74473				1	VDAC3
Se	Protein Synthesis	quantity of hemoglobin in blood	0.018	1.74473				1	HBZ
Se	Cell-To-Cell Signaling and Interaction, Molecular Transport, Small Molecule Biochemistry	secretion of neurotransmitter	0.0189	1.72354				2	STXBP1,SYN1
Se	Cell-To-Cell Signaling and Interaction	activation of carcinoma cell lines	0.0192	1.7167				1	PSMC2
Se	Cell Morphology, Hair and Skin Development and Function	cell spreading of epithelial cell lines	0.0192	1.7167				1	VIM
Se	Endocrine System Development and Function, Lipid Metabolism, Small Molecule Biochemistry, Vitamin and Mineral Metabolism	synthesis of corticosterone	0.0192	1.7167				1	VIM
Se	Protein Synthesis	polymerization of protein	0.018	1.74473				3	ALDOC,DPYSL3,GLUL
Se	Cell Cycle	G1/S phase transition of bone cancer cell lines	0.0204	1.69037				1	YWHAQ
Se	Cardiovascular Disease, Metabolic Disease, Neurological Disease, Psychological Disorders	cerebral amyloid angiopathy	0.0204	1.69037				1	VIM
Se	Behavior	aggressive behavior toward mice	0.0216	1.66555				1	SYN1
Se	Cancer, Cardiovascular Disease, Organismal Injury and Abnormalities	vascular tumor	0.0193	1.71444				3	SDHA,TUBB4A,TUBB4B
Se	Psychological Disorders	Mood Disorders	0.022	1.65758				3	GPX4,SYN1,VIM
Se	Cancer, Hematological Disease, Immunological Disease, Organismal Injury and Abnormalities	chronic lymphocytic leukemia	0.022	1.65758				3	SEPT6,TUBB4A,TUBB4B
Se	Cell Morphology, Cellular Function and Maintenance	autophagy of bone cancer cell lines	0.0228	1.64207				1	YWHAQ
Se	Dermatological Diseases and Conditions, Infectious Diseases	condylomata acuminata	0.0228	1.64207				1	TUBB4A
Se	Cell Death and Survival, Hematological System Development and Function	survival of red blood cells	0.0228	1.64207				1	HBZ
Se	Cell-To-Cell Signaling and Interaction, Nervous System Development and Function	synaptic transmission of neuromuscular synapse	0.0228	1.64207				1	STXBP1
Se	Lipid Metabolism, Molecular Transport, Small Molecule Biochemistry	uptake of palmitic acid	0.0228	1.64207				1	FABP3
Se	Cancer, Neurological Disease, Organismal Injury and Abnormalities	astrocytoma	0.0236	1.62709				4	ALDOC,ATP6V1A,GNAO1,YWHAQ
Se	Cardiovascular System Development and Function, Organ Morphology	contraction of heart	0.0247	1.6073				2	GNAO1,GNB1
Se	Lipid Metabolism, Small Molecule Biochemistry	metabolism of prostaglandin	0.0251	1.60033				2	GPX4,VIM
Se	Cellular Development, Cellular Growth and Proliferation	arrest in growth of breast cancer cell lines	0.0252	1.5986				1	YWHAQ
Se	Cell Morphology, Cellular Function and Maintenance	autophagy of sarcoma cell lines	0.0252	1.5986				1	YWHAQ
Se	Free Radical Scavenging, Small Molecule Biochemistry	catabolism of hydrogen peroxide	0.0252	1.5986				1	GPX4
Se	Connective Tissue Disorders, Hematological Disease, Organismal Injury and Abnormalities	poikilocytosis	0.0252	1.5986				1	HBZ
Se	Cancer, Organismal Injury and Abnormalities, Reproductive System Disease	endometrial carcinoma	0.0258	1.58838				9	GLUL,GNAO1,SDHA,SEPT6,STXBP1,SYN1,TUBB2B,TUBB4A,TUBB4B
Se	Cell Signaling	small GTPase mediated signal transduction	0.0263	1.58004				2	GNB1,YWHAQ
Se	Cell Morphology, Cellular Assembly and Organization, Cellular Function and Maintenance	formation of microspikes	0.0263	1.58004				1	GNAO1
Se	Cell Morphology, Renal and Urological System Development and Function	cell spreading of kidney cell lines	0.0275	1.56067				1	VIM
Se	Cell Morphology, Cellular Assembly and Organization	mass of mitochondria	0.0275	1.56067				1	GPX4
Se	Cancer, Organismal Injury and Abnormalities, Reproductive System Disease	genital tract cancer	0.028	1.55284				12	ALDH7A1,GLUL,GNAO1,SDHA,SEPT6,STXBP1,SYN1,TUBB2B,TUBB4A,TUBB4B,VIM,YWHAQ
Se	Cell Death and Survival, Neurological Disease	apoptosis of neurons	0.0286	1.54363				3	GNAO1,GPI,STXBP1
Se	Cardiovascular System Development and Function, Cell Morphology	cell spreading of endothelial cells	0.0287	1.54212				1	VIM
Se	Cellular Development	differentiation of embryonic cancer cell lines	0.0287	1.54212				1	GNAO1
Se	Cellular Movement	migration of melanoma cells	0.0287	1.54212				1	VIM
Se	Cell Death and Survival, Cellular Compromise, Neurological Disease, Tissue Morphology	neurodegeneration of dopaminergic neurons	0.0287	1.54212				1	FABP3
Se	Lipid Metabolism, Small Molecule Biochemistry	synthesis of platelet activating factor	0.0287	1.54212				1	GPX4
Se	Connective Tissue Disorders, Developmental Disorder, Hereditary Disorder, Organismal Injury and Abnormalities	Marfan's syndrome	0.0299	1.52433				1	ALDOC
Se	Hematological Disease	anisocytosis	0.0299	1.52433				1	HBZ
Se	Cell Death and Survival, Connective Tissue Disorders	apoptosis of osteoclasts	0.0299	1.52433				1	VIM
Se	Cellular Development, Nervous System Development and Function	differentiation of Schwann cells	0.0299	1.52433				1	GLUL
Se	Cellular Assembly and Organization, Cellular Function and Maintenance	quantity of microtubules	0.0299	1.52433				1	VIM
Se	Cellular Assembly and Organization, Nervous System Development and Function	recycling of synaptic vesicles	0.0299	1.52433				1	SYN1
Se	Cellular Movement	invasion of fibrosarcoma cell lines	0.0311	1.50724				1	GPI
Se	Lipid Metabolism, Small Molecule Biochemistry	metabolism of arachidonic acid	0.0311	1.50724				1	GPX4
Se	Cardiovascular Disease, Hereditary Disorder, Organismal Injury and Abnormalities, Skeletal and Muscular Disorders	familial dilated cardiomyopathy	0.0322	1.49214				1	SDHA
Se	Cell Cycle, Cellular Assembly and Organization, DNA Replication, Recombination, and Repair	formation of centriole	0.0322	1.49214				1	VDAC3
Se	Cardiovascular Disease, Organismal Injury and Abnormalities, Skeletal and Muscular Disorders	idiopathic dilated cardiomyopathy	0.0322	1.49214				1	SDHA
Se	Cell Cycle, Cellular Assembly and Organization, Cellular Function and Maintenance, DNA Replication, Recombination, and Repair	organization of chromatin	0.0322	1.49214				1	GPX4
Se	Cellular Assembly and Organization, Cellular Function and Maintenance	organization of intermediate filaments	0.0322	1.49214				1	VIM
Se	Amino Acid Metabolism, Molecular Transport, Small Molecule Biochemistry	uptake of L-glutamic acid	0.0322	1.49214				1	GLUL
Se	Cell Morphology	morphology of tumor cell lines	0.0326	1.48678				2	GNAO1,VIM
Se	Cellular Assembly and Organization, Cellular Function and Maintenance	organization of filaments	0.0329	1.4828				2	GPI,VIM
Se	Cancer, Hematological Disease, Immunological Disease, Organismal Injury and Abnormalities	small-cell lymphocytic lymphoma	0.0334	1.47625				1	GNB1
Se	Behavior	conditioning	0.0337	1.47237				2	SYN1,VDAC3
Se	Cellular Assembly and Organization, Cellular Function and Maintenance	binding of microtubules	0.0346	1.46092				1	VIM
Se	Cellular Movement, Hematological System Development and Function, Immune Cell Trafficking, Inflammatory Response	chemotaxis of natural killer cells	0.0346	1.46092				1	GNAO1
Se	Cancer, Organismal Injury and Abnormalities, Reproductive System Disease	tumorigenesis of genital organ	0.036	1.4437				13	ALDH7A1,ATP6V1B2,GLUL,GNAO1,SDHA,SEPT6,STXBP1,SYN1,TUBB2B,TUBB4A,TUBB4B,VIM,YWHAQ
Se	Cell Cycle	G1/S phase transition	0.036	1.4437				2	GPI,YWHAQ
Se	Cancer, Organismal Injury and Abnormalities, Reproductive System Disease	genital tumor	0.0361	1.44249				13	ALDH7A1,ATP6V1B2,GLUL,GNAO1,SDHA,SEPT6,STXBP1,SYN1,TUBB2B,TUBB4A,TUBB4B,VIM,YWHAQ
Se	Cellular Development, Cellular Growth and Proliferation, Nervous System Development and Function, Tissue Development	development of astrocytes	0.0369	1.43297				1	VIM
Se	Cellular Development, Hematological System Development and Function, Hematopoiesis, Tissue Development	maturation of red blood cells	0.0369	1.43297				1	HBZ
Se	Lipid Metabolism, Small Molecule Biochemistry	reduction of lipid	0.0369	1.43297				1	GPX4
Se	Cell-To-Cell Signaling and Interaction, Molecular Transport, Small Molecule Biochemistry	release of acetylcholine	0.0369	1.43297				1	FABP3
Se	Cancer, Organismal Injury and Abnormalities, Reproductive System Disease	breast cancer	0.0375	1.42597				6	ALDOC,GLUL,TUBB4A,TUBB4B,VDAC3,YWHAQ
Se	Cancer, Organismal Injury and Abnormalities	breast or ovarian cancer	0.0379	1.42136				7	ALDOC,GLUL,TUBB4A,TUBB4B,VDAC3,VIM,YWHAQ
Se	Cell Cycle, Connective Tissue Development and Function	G1/S phase transition of fibroblast cell lines	0.0381	1.41908				1	GPI
Se	Hereditary Disorder, Metabolic Disease, Neurological Disease, Organismal Injury and Abnormalities, Skeletal and Muscular Disorders	Leigh syndrome	0.0381	1.41908				1	SDHA
Se	Cellular Assembly and Organization	docking of vesicles	0.0381	1.41908				1	STXBP1
Se	Lipid Metabolism, Small Molecule Biochemistry	hydrolysis of triacylglycerol	0.0381	1.41908				1	FABP3
Se	Endocrine System Disorders, Hematological Disease	hypercalcemia	0.0393	1.40561				1	ATP6V1B2
Se	Cell Morphology	morphology of carcinoma cell lines	0.0393	1.40561				1	VIM
Se	Neurological Disease	amyotrophic lateral sclerosis	0.0398	1.40012				2	FABP3,VIM
Se	Cell Morphology, Nervous System Development and Function, Organ Morphology, Organismal Development, Tissue Morphology	abnormal morphology of pyramidal neurons	0.0404	1.39362				1	SYN1
Se	Cardiovascular System Development and Function, Cell Morphology, Organ Morphology, Skeletal and Muscular System Development and Function	contraction of cardiomyocytes	0.0404	1.39362				1	GNB1
Se	Cell-To-Cell Signaling and Interaction, Cellular Function and Maintenance, Inflammatory Response	phagocytosis of leukemia cell lines	0.0404	1.39362				1	VIM
Se	Cancer, Organismal Injury and Abnormalities	urogenital cancer	0.0407	1.39041				13	ALDH7A1,GLUL,GNAO1,GNB1,SDHA,SEPT6,STXBP1,SYN1,TUBB2B,TUBB4A,TUBB4B,VIM,YWHAQ
Se	Organismal Injury and Abnormalities	Organ Degeneration	0.041	1.38722				3	GNB1,GPX4,VIM
Se	Carbohydrate Metabolism, Molecular Transport	quantity of lactic acid	0.0416	1.38091				1	FABP3
Se	Cell-To-Cell Signaling and Interaction	recognition of cells	0.0416	1.38091				1	STXBP1
Se	Cancer, Neurological Disease, Organismal Injury and Abnormalities	brain gliomatosis	0.0417	1.37986				3	ALDOC,ATP6V1A,SDHA
Se	Infectious Diseases	replication of RNA virus	0.0422	1.37469				3	ATP6V1A,ATP6V1B2,HBZ
Se	Cancer, Gastrointestinal Disease, Organismal Injury and Abnormalities	esophageal cancer	0.0428	1.36856				3	FABP3,TUBB4A,TUBB4B
Se	Cancer, Endocrine System Disorders, Organismal Injury and Abnormalities	endocrine gland tumor	0.0435	1.36151				6	ALDOC,ATP6V1A,SDHA,TUBB4A,TUBB4B,VIM
Se	Cellular Assembly and Organization	formation of actin bundles	0.0439	1.35754				1	DPYSL3
Se	Organismal Injury and Abnormalities, Renal and Urological Disease	chronic kidney disease	0.0443	1.3536				2	TUBB4A,TUBB4B
Se	Cell Death and Survival	cell death of photoreceptors	0.0451	1.34582				1	GPX4
Se	Developmental Disorder	gastrulation failure	0.0451	1.34582				1	GPX4
Se	Neurological Disease, Organismal Injury and Abnormalities	neurodegeneration of hippocampus	0.0451	1.34582				1	VIM
Se	Hereditary Disorder, Neurological Disease, Organismal Injury and Abnormalities	spinocerebellar ataxia type 7	0.0451	1.34582				1	GNB1
Se	Cell Death and Survival	cell death of lung cancer cell lines	0.0457	1.34008				2	GPI,TRAP1
Se	Behavior	circling behavior	0.0462	1.33536				1	GNAO1
Se	Cell Morphology, Cellular Assembly and Organization	abnormal morphology of mitochondria	0.0474	1.32422				1	VDAC3
Se	Cancer, Organismal Injury and Abnormalities	neoplasia of fibroblast cell lines	0.0474	1.32422				1	GPI
Se	Skeletal and Muscular System Development and Function	muscle contraction	0.0478	1.32057				2	GNAO1,GNB1
Se	Hematological Disease, Immunological Disease	lymphoproliferative disorder	0.0493	1.30715				4	GNB1,SEPT6,TUBB4A,TUBB4B
Se	Post-Translational Modification, Protein Synthesis	heterotetramerization of protein	0.0497	1.30364				1	ALDOC
Se x Hg	Developmental Disorder, Hereditary Disorder, Metabolic Disease, Organismal Injury and Abnormalities	mitochondrial respiratory chain deficiency	1.58e-06	5.80134				3	ATP5A1,NDUFS1,NDUFS2
Se x Hg	Developmental Disorder, Hereditary Disorder, Metabolic Disease, Organismal Injury and Abnormalities	Mitochondrial complex I deficiency	6.91e-05	4.16052				2	NDUFS1,NDUFS2
Se x Hg	Energy Production, Nucleic Acid Metabolism, Small Molecule Biochemistry	metabolism of ATP	0.000102	3.9914				2	ATP5A1,NDUFS1
Se x Hg	Developmental Disorder, Ophthalmic Disease, Organismal Injury and Abnormalities	Baraitser-Winter syndrome type 2	0.000388	3.41117				1	ACTG1
Se x Hg	Auditory Disease, Hereditary Disorder, Neurological Disease, Organismal Injury and Abnormalities	autosomal dominant deafness type 20	0.000388	3.41117				1	ACTG1
Se x Hg	Hereditary Disorder, Metabolic Disease, Organismal Injury and Abnormalities	combined oxidative phosphorylation deficiency 22	0.000388	3.41117				1	ATP5A1
Se x Hg	Embryonic Development, Hair and Skin Development and Function, Organ Development, Organismal Development, Tissue Development	delay in initiation of re-epithelialization of skin	0.000388	3.41117				1	PPM1A
Se x Hg	Cancer, Organismal Injury and Abnormalities, Reproductive System Disease	grade 4 prostatic carcinoma	0.000388	3.41117				1	CKB
Se x Hg	Developmental Disorder, Hereditary Disorder, Metabolic Disease, Organismal Injury and Abnormalities	mitochondrial complex V deficiency nuclear type 4	0.000388	3.41117				1	ATP5A1
Se x Hg	Hereditary Disorder, Neurological Disease, Organismal Injury and Abnormalities	pyridoxine-dependent epilepsy	0.000388	3.41117				1	ALDH7A1
Se x Hg	Hereditary Disorder, Metabolic Disease, Organismal Injury and Abnormalities, Renal and Urological Disease	renal tubular acidosis with progressive nerve deafness	0.000388	3.41117				1	ATP6V1B1
Se x Hg	Organismal Injury and Abnormalities, Renal and Urological Disease	acidification of urine	0.000776	3.11014				1	ATP6V1B1
Se x Hg	Cellular Response to Therapeutics	drug resistance of fibroblast cell lines	0.000776	3.11014				1	ACTG1
Se x Hg	Free Radical Scavenging, Molecular Transport	accumulation of superoxide	0.00116	2.93554				1	NDUFS1
Se x Hg	Cell Cycle, Embryonic Development	arrest in G2/M phase of embryonic cell lines	0.00116	2.93554				1	PPM1A
Se x Hg	Cell Cycle, Hair and Skin Development and Function	arrest in G2/M phase of epithelial cell lines	0.00116	2.93554				1	PPM1A
Se x Hg	Cell Cycle, Renal and Urological System Development and Function	arrest in G2/M phase of kidney cell lines	0.00116	2.93554				1	PPM1A
Se x Hg	Amino Acid Metabolism, Small Molecule Biochemistry	metabolism of phosphocreatine	0.00116	2.93554		-0.555	bias	1	CKB
Se x Hg	Post-Translational Modification	myristoylation of protein	0.00155	2.80967				1	PPM1A
Se x Hg	Cellular Assembly and Organization	opening of pore	0.00155	2.80967				1	CKB
Se x Hg	Organismal Injury and Abnormalities	abnormal pH regulation	0.00194	2.7122				1	ATP6V1B1
Se x Hg	Cell Signaling, Molecular Transport, Vitamin and Mineral Metabolism	abnormal quantity of Ca2+	0.00194	2.7122				1	ATP6V1B1
Se x Hg	Organismal Injury and Abnormalities, Renal and Urological Disease	abnormal transport in kidney	0.00194	2.7122				1	ATP6V1B1
Se x Hg	Free Radical Scavenging, Molecular Transport	accumulation of hydrogen peroxide	0.0031	2.50864				1	NDUFS1
Se x Hg	Cellular Assembly and Organization, Cellular Function and Maintenance	number of stereocilia	0.0031	2.50864				1	ACTG1
Se x Hg	Cell Morphology, Cellular Assembly and Organization	structural integrity of plasma membrane	0.0031	2.50864				1	NDUFS1
Se x Hg	Cancer, Hematological Disease, Immunological Disease, Organismal Injury and Abnormalities	recurrent childhood acute lymphoblastic leukemia	0.00349	2.45717				1	ACTG1
Se x Hg	Hereditary Disorder, Metabolic Disease, Neurological Disease, Organismal Injury and Abnormalities, Psychological Disorders, Skeletal and Muscular Disorders	MELAS syndrome	0.00387	2.41229				1	NDUFS1
Se x Hg	Developmental Disorder, Hereditary Disorder, Metabolic Disease, Organismal Injury and Abnormalities	lipidosis	0.00503	2.29843				1	ATP5A1
Se x Hg	Cancer, Hematological Disease, Immunological Disease, Organismal Injury and Abnormalities	acute leukemia	0.00528	2.27737				4	ACTG1,ATP5A1,ATP6V1B1,NDUFS1
Se x Hg	Molecular Transport	quantity of bicarbonate	0.00542	2.266				1	ATP6V1B1
Se x Hg	Cell Morphology, Nervous System Development and Function, Tissue Morphology	abnormal morphology of mossy fibers	0.00619	2.20831				1	CKB
Se x Hg	Renal and Urological System Development and Function	pH of urine	0.00658	2.18177				1	ATP6V1B1
Se x Hg	Behavior	nest building behavior	0.00735	2.13371				1	CKB
Se x Hg	Cancer, Organismal Injury and Abnormalities, Reproductive System Disease	prostatic carcinoma	0.00742	2.1296				3	ALDH7A1,CKB,NDUFS2
Se x Hg	Cancer, Cellular Response to Therapeutics, Organismal Injury and Abnormalities	chemotherapy resistance of tumor cell lines	0.00773	2.11182				1	ACTG1
Se x Hg	Cell-To-Cell Signaling and Interaction, Cellular Function and Maintenance, Inflammatory Response	phagocytosis by macrophage cancer cell lines	0.00812	2.09044				1	CKB
Se x Hg	Cellular Function and Maintenance, Small Molecule Biochemistry	homeostasis of chloride	0.0131	1.88273				1	CKB
Se x Hg	Cell Morphology, Cellular Function and Maintenance	mitochondrial membrane potential	0.015	1.82391				1	NDUFS1
Se x Hg	Cell Morphology, Cellular Function and Maintenance	pH of cells	0.0158	1.80134				1	ATP6V1B1
Se x Hg	Inflammatory Response, Tissue Development	acute inflammation of tissue	0.0162	1.79048				1	PPM1A
Se x Hg	Cardiovascular System Development and Function, Cellular Assembly and Organization, Cellular Development, Cellular Function and Maintenance, Cellular Growth and Proliferation, Embryonic Development, Organ Development, Organismal Development, Skeletal and Muscular System Development and Function, Tissue Development	organization of sarcomere	0.0169	1.77211				1	ACTG1
Se x Hg	Cancer, Organismal Injury and Abnormalities, Reproductive System Disease	tumorigenesis of genital organ	0.0179	1.74715				6	ACTG1,ALDH7A1,ATP6V1B1,CKB,NDUFS1,NDUFS2
Se x Hg	Cancer, Organismal Injury and Abnormalities, Reproductive System Disease	genital tumor	0.0179	1.74715				6	ACTG1,ALDH7A1,ATP6V1B1,CKB,NDUFS1,NDUFS2
Se x Hg	Molecular Transport	transport of H+	0.0181	1.74232				1	ATP6V1B1
Se x Hg	Auditory and Vestibular System Development and Function	hearing	0.0189	1.72354				1	ACTG1
Se x Hg	Renal and Urological System Development and Function	osmolality of urine	0.0192	1.7167				1	ATP6V1B1
Se x Hg	Neurological Disease	seizure disorder	0.0213	1.67162				2	ALDH7A1,CKB
Se x Hg	Cancer, Organismal Injury and Abnormalities	lymphoid cancer	0.0226	1.64589				4	ACTG1,ATP5A1,ATP6V1B1,NDUFS1
Se x Hg	Nervous System Development and Function, Organ Morphology	mass of brain	0.0234	1.63078		1.172		1	CKB
Se x Hg	Cell Death and Survival, Embryonic Development	cell viability of embryonic cell lines	0.0253	1.59688				1	PPM1A
Se x Hg	Cancer, Endocrine System Disorders, Organismal Injury and Abnormalities, Reproductive System Disease	primary ovarian cancer	0.0283	1.54821				1	ATP6V1B1
Se x Hg	Cell Death and Survival, Renal and Urological System Development and Function	cell viability of kidney cell lines	0.0291	1.53611				1	PPM1A
Se x Hg	Cell-To-Cell Signaling and Interaction, Nervous System Development and Function	auditory evoked potential	0.0302	1.51999				1	ACTG1
Se x Hg	Drug Metabolism, Molecular Transport, Small Molecule Biochemistry	concentration of glutathione	0.0306	1.51428				1	NDUFS1
Se x Hg	Neurological Disease, Psychological Disorders	Dementia	0.0313	1.50446				2	ATP5A1,NDUFS1
Se x Hg	Hereditary Disorder, Neurological Disease, Organismal Injury and Abnormalities, Psychological Disorders, Skeletal and Muscular Disorders	Huntington's Disease	0.0316	1.50031				2	CKB,NDUFS2
Se x Hg	Cellular Movement, Hair and Skin Development and Function	migration of keratinocytes	0.0317	1.49894				1	PPM1A
Se x Hg	Behavior, Nervous System Development and Function	startle response	0.0325	1.48812				1	CKB
Se x Hg	Cancer, Hematological Disease, Immunological Disease, Organismal Injury and Abnormalities	acute myeloid leukemia	0.0329	1.4828				3	ATP5A1,ATP6V1B1,NDUFS1
Se x Hg	Organismal Development	lean body mass	0.034	1.46852				1	ATP5A1
Se x Hg	Behavior	exploratory behavior	0.0348	1.45842				1	CKB
Se x Hg	Auditory and Vestibular System Development and Function, Embryonic Development, Organ Development, Organ Morphology, Organismal Development, Tissue Development	morphogenesis of inner ear	0.0348	1.45842				1	ATP6V1B1
Se x Hg	Cancer, Endocrine System Disorders, Organismal Injury and Abnormalities, Respiratory Disease	small cell lung cancer	0.0378	1.42251				1	CKB
Se x Hg	Cell Death and Survival, Hair and Skin Development and Function	cell viability of epithelial cell lines	0.0381	1.41908				1	PPM1A
Se x Hg	Cell Morphology, Cellular Assembly and Organization	morphology of mitochondria	0.0411	1.38616				1	NDUFS1
Se x Hg	Cellular Function and Maintenance	cellular homeostasis	0.0421	1.37572				3	ATP6V1B1,CKB,NDUFS1
Se x Hg	Nervous System Development and Function, Organ Morphology, Organismal Development	abnormal morphology of hippocampus	0.0437	1.35952				1	CKB
Se x Hg	Gastrointestinal Disease, Inflammatory Disease, Inflammatory Response	ulcerative colitis	0.0445	1.35164				1	CKB
Se x Hg	Cancer, Organismal Injury and Abnormalities, Reproductive System Disease	genital tract cancer	0.0452	1.34486				5	ALDH7A1,ATP6V1B1,CKB,NDUFS1,NDUFS2
Se x Hg	Energy Production, Molecular Transport, Nucleic Acid Metabolism, Small Molecule Biochemistry	concentration of ATP	0.0497	1.30364				1	NDUFS1
						-1.165
						-1.188	bias
						0.792
						0.686
						1.966	bias
						-0.961
						-0.524
					Increased	2.2
						1.969
						-0.198	bias
						-1.146
						-0.629

## Sheet: Supplementary Table2D
Analysis	Upstream Regulator	Expr Fold Change	Expr p-value	Molecule Type	Predicted Activation State	Activation z-score	p-value of overlap	-log(p-value)	Molecules	Target molecules in dataset
Se	ciprofloxacin			chemical drug	Inhibited	-2	5.55e-06	5.25571	4	ATP6V1A,ATP6V1B2,STXBP1,VIM
Se	RICTOR			other		-1.342	8.22e-06	5.08513	5	ATP6V1A,ATP6V1B2,PSMC2,PSMD8,SDHA
Se	beta-estradiol			chemical - endogenous mammalian		0	0.0369	1.43297	5	ALDH7A1,FABP3,GNB1,STXBP1,VIM
Hg	ciprofloxacin			chemical drug		0.447	4.18e-09	8.37882	5	ATP5A1,ATP6V1B2,HSPA9,HSPD1,STXBP1
Hg	D-glucose			chemical - endogenous mammalian		1	0.00021	3.67778	4	ALDOC,ENO1,HSPD1,STXBP1
Hg	beta-estradiol			chemical - endogenous mammalian		1.732	0.0178	1.74958	4	ENO1,HSPA9,HSPD1,STXBP1
Se	MGEA5			enzyme		0.577	0.000602	3.2204	4	ALDOC,FABP3,GLUL,VIM
Hg	MYC			transcription regulator		1.94	0.00261	2.58336	4	ENO1,HSPA9,HSPD1,LDHB
Hg	RICTOR			other	Activated	2.236	3.43e-07	6.46471	5	ATP5A1,ATP5H,ATP6V1B1,ATP6V1B2,SDHA
Hg	MAPT			other			4.5e-09	8.34679	6	ACTG1,ATP5A1,ATP5H,ENO1,HSPD1,STXBP1
Se	MYC			transcription regulator		0.728	0.0225	1.64782	4	GLUL,GPI,TRAP1,VIM
Se x Hg	RICTOR			other			1.12e-06	5.95078	4	ATP5A1,ATP6V1B1,NDUFS1,NDUFS2
Hg	APP			other			8.18e-09	8.08725	8	ACTG1,ALDOC,ATP5A1,ATP5H,ENO1,HSPD1,LDHB,STXBP1
Hg	PSEN1			peptidase			4.95e-08	7.30539	6	ACTG1,ATP5A1,ATP5H,ENO1,HSPD1,STXBP1
Se	tretinoin			chemical - endogenous mammalian		0.829	0.0163	1.78781	5	ATP6V1B2,DPYSL3,GNAO1,SYN1,VIM
Se	forskolin			chemical toxicant		1	0.00503	2.29843	4	ALDOC,ATP6V1A,ATP6V1B2,VIM
Se	TP53			transcription regulator		1.15	7.37e-05	4.13253	8	FABP3,GLUL,GPI,PSMD8,SYN1,TRAP1,TUBB4A,VIM
Se	BDNF			growth factor		1.4	2.17e-08	7.66354	7	ALDH7A1,DPYSL3,GLUL,GNAO1,STXBP1,SYN1,VIM
Se	ERBB2			kinase		1.982	0.000541	3.2668	5	ALDOC,ATP6V1A,PSMD8,TUBB4A,VIM
Hg	HTT			transcription regulator			6.54e-08	7.18442	7	ALDOC,ATP5A1,HSPA9,HSPD1,LDHB,SDHA,STXBP1
Se	MKNK1			kinase	Activated	2	3.78e-06	5.42251	4	DPYSL3,GNAO1,STXBP1,VIM
Hg	2-amino-1-methyl-6-phenylimidazo-4-5-b-pyridine			chemical toxicant			2.33e-06	5.63264	3	CCT5,CCT8,HSPD1
Hg	LONP1			peptidase			3.44e-06	5.46344	3	ATP5A1,HSPA9,HSPD1
Hg	ESRRA			ligand-dependent nuclear receptor			2.39e-05	4.6216	3	ALDOC,ENO1,LDHB
Se x Hg	MAPT			other			6.95e-05	4.15802	3	ACTG1,ATP5A1,CKB
Hg	MEL T1			chemical - kinase inhibitor			4.09e-05	4.38828	2	ENO1,HSPD1
Se	ADORA2A			g-protein coupled receptor	Activated	2	1.05e-05	4.97881	4	ALDOC,ATP6V1B2,GPI,TUBB4A
Hg	ADORA2A			g-protein coupled receptor			5.83e-05	4.23433	3	ALDOC,ATP6V1B2,CCT5
Hg	peoniflorin			chemical drug			6.47e-05	4.1891	2	ATP5A1,ENO1
Hg	5-azacytidine			chemical drug			7.13e-05	4.14691	3	ATP5A1,HSPD1,LDHB
Hg	Ubiquitin			group			0.000119	3.92445	2	HSPA9,HSPD1
Hg	mono-(2-ethylhexyl)phthalate			chemical toxicant			0.000122	3.91364	3	ALDOC,ENO1,SDHA
Hg	grape seed extract			chemical drug			0.000128	3.89279	2	ENO1,HSPD1
Hg	dichlorovinylcysteine			chemical toxicant			0.000138	3.86012	2	ENO1,HSPA9
Se	D-glucose			chemical - endogenous mammalian	Activated	2	0.000204	3.69037	5	ALDOC,GLUL,GPI,STXBP1,TUBB4A
Hg	PDX1			transcription regulator			0.000145	3.83863	3	ACTG1,ATP5H,SDHA
Se	MAPT			other			3.4e-12	11.4685	9	ATP6V1A,DPYSL3,GNAO1,GPX4,HBZ,STXBP1,SYN1,TUBB2B,TUBB4B
Se x Hg	PSEN1			peptidase			0.000229	3.64016	3	ACTG1,ATP5A1,CKB
Hg	HSF2			transcription regulator			0.000148	3.82974	2	CCT5,CCT8
Hg	HSF1			transcription regulator			0.000155	3.80967	3	CCT5,CCT8,HSPD1
Hg	ESRRG			ligand-dependent nuclear receptor			0.000238	3.62342	2	ALDOC,ENO1
Se x Hg	ASB9			transcription regulator			0.000347	3.45967	1	CKB
Hg	tetraethylammonium			chemical drug			0.000251	3.60033	2	ATP5H,HSPA9
Hg	PPARGC1A			transcription regulator			0.00027	3.56864	3	ATP5A1,ATP5H,SDHA
Se	APP			other			4.48e-10	9.34872	11	ALDOC,ATP6V1A,FABP3,GNAO1,GNB1,GPI,HBZ,STXBP1,SYN1,TUBB2B,TUBB4B
Se	PSEN1			peptidase			4.04e-09	8.39362	8	ATP6V1A,GNAO1,GNB1,HBZ,STXBP1,SYN1,TUBB2B,TUBB4B
Se	HTT			transcription regulator			4.71e-07	6.32698	8	ALDOC,GLUL,GNAO1,GPI,SDHA,STXBP1,SYN1,TRAP1
Hg	3-nitropropionic acid			chemical toxicant			0.000464	3.33348	2	ATP6V1B2,LDHB
Se	ARNT			transcription regulator			6.87e-06	5.16304	4	ALDH7A1,ALDOC,GPI,VIM
Se x Hg	ARNT			transcription regulator			0.000678	3.16877	2	ALDH7A1,NDUFS2
Hg	PRL			cytokine			0.000515	3.28819	3	ATP5H,ENO1,HSPD1
Se	RTN4			other			2.41e-05	4.61798	3	GNAO1,TUBB4A,YWHAQ
Se	dihydrotestosterone			chemical - endogenous mammalian			0.000217	3.66354	5	GLUL,GPI,GPX4,STXBP1,VIM
Se	taurine			chemical - endogenous mammalian			0.000584	3.23359	2	SYN1,VIM
Se	CD38			enzyme			0.000627	3.20273	3	ALDOC,TUBB2B,VIM
Se	mono-(2-ethylhexyl)phthalate			chemical toxicant			0.000725	3.13966	3	ALDOC,GPI,SDHA
Hg	ATP6V1B1	-1.03		transporter			0.000608	3.2161	1	ATP6V1B2
Hg	heparin			chemical - endogenous mammalian			0.000697	3.15677	2	ATP5A1,SDHA
Se	ouabain			chemical drug			0.000859	3.06601	2	VIM,YWHAQ
Hg	Esrra			transcription regulator			0.00116	2.93554	2	ALDOC,ENO1
Se x Hg	mono-(2-ethylhexyl)phthalate			chemical toxicant			0.00137	2.86328	2	NDUFS1,NDUFS2
Se	crizotinib			chemical drug			0.00108	2.96658	1	VIM
Hg	INSR			kinase			0.00118	2.92812	3	ATP5A1,ATP5H,HSPD1
Se	SPRED2			cytokine			0.00108	2.96658	1	VIM
Se	ATP6V1B1			transporter			0.00108	2.96658	1	ATP6V1B2
Se x Hg	PDX1			transcription regulator			0.00154	2.81248	2	ACTG1,CKB
Se	SOD1			enzyme			0.00125	2.90309	3	ALDOC,DPYSL3,TUBB4A
Se	docetaxel			chemical drug			0.00139	2.85699	2	TUBB4A,TUBB4B
Se	3-nitropropionic acid			chemical toxicant			0.00151	2.82102	2	ATP6V1B2,GPI
Se x Hg	FOXI1			transcription regulator			0.00173	2.76195	1	ATP6V1B1
Se x Hg	UTRN			transmembrane receptor			0.00173	2.76195	1	ACTG1
Se x Hg	NUBPL			other			0.00173	2.76195	1	NDUFS1
Se	NRG1			growth factor			0.00152	2.81816	3	GPI,SDHA,VIM
Se	NTRK2			kinase			0.00162	2.79048	2	SYN1,VIM
Hg	desmopressin			biologic drug			0.00133	2.87615	2	ENO1,LDHB
Hg	FOLR1			transporter			0.00145	2.83863	2	ALDOC,ATP6V1B2
Hg	GIMAP1-GIMAP5			other			0.00182	2.73993	1	HSPD1
Hg	AMPK			complex			0.00191	2.71897	2	LDHB,SDHA
Hg	RET			kinase			0.00205	2.68825	2	HSPA9,HSPD1
Hg	sirolimus			chemical drug			0.00206	2.68613	3	ENO1,HSPD1,LDHB
Se	PLN			transporter			0.00168	2.77469	2	FABP3,VIM
Se	bortezomib			chemical drug			0.00171	2.767	3	PSMC2,PSMD8,VIM
Se	RHO			g-protein coupled receptor			0.00174	2.75945	2	DPYSL3,GNB1
Se	Pln			other			0.00174	2.75945	2	FABP3,VIM
Se	KDM4B			enzyme			0.00217	2.66354	1	VIM
Se x Hg	PPARGC1A			transcription regulator			0.00234	2.63078	2	ATP5A1,NDUFS1
Hg	pirinixic acid			chemical toxicant			0.00212	2.67366	3	ALDOC,HSPD1,LDHB
Se x Hg	APP			other			0.00244	2.61261	3	ACTG1,ATP5A1,CKB
Se	TIAM2			enzyme			0.00217	2.66354	1	VIM
Hg	ARNT			transcription regulator			0.00216	2.66555	2	ALDOC,ENO1
Se	heparin			chemical - endogenous mammalian			0.00225	2.64782	2	SDHA,VIM
Hg	spiperone			chemical drug			0.00243	2.61439	1	SDHA
Hg	FOXI1			transcription regulator			0.00303	2.51856	1	ATP6V1B1
Hg	UTRN			transmembrane receptor			0.00303	2.51856	1	ACTG1
Se x Hg	Pde			group			0.00312	2.50585	1	ATP5A1
Hg	MYCL			transcription regulator			0.00303	2.51856	1	HSPD1
Se	GDNF			growth factor			0.00232	2.63451	2	GNB1,TUBB4A
Se	HIPK2			kinase			0.00232	2.63451	2	HBZ,VIM
Se	bromobenzene			chemical toxicant			0.00261	2.58336	2	TUBB2B,YWHAQ
Se	HRAS			enzyme			0.00302	2.51999	4	FABP3,SDHA,SYN1,VIM
Se	NPAS4			transcription regulator			0.00325	2.48812	1	SYN1
Se	CHD5			enzyme			0.00325	2.48812	1	VIM
Se	PTPN23			phosphatase			0.00325	2.48812	1	VIM
Se	EFEMP1			enzyme			0.00325	2.48812	1	VIM
Hg	methapyrilene			chemical drug			0.00313	2.50446	2	ACTG1,ATP6V1B2
Hg	acetaminophen			chemical drug			0.00359	2.44491	2	ACTG1,HSPD1
Hg	phlorizin			chemical - endogenous non-mammalian			0.00364	2.4389	1	STXBP1
Hg	CACNA1C			ion channel			0.00364	2.4389	1	ENO1
Hg	EN2			transcription regulator			0.00364	2.4389	1	ALDOC
Se	USP37			peptidase			0.00325	2.48812	1	SYN1
Se	SLC12A6			transporter			0.00325	2.48812	1	VIM
Hg	risedronic acid			chemical drug			0.00364	2.4389	1	HSPD1
Hg	ST1926			chemical drug			0.00423	2.37366	2	ATP5A1,ENO1
Hg	raclopride			chemical drug			0.00425	2.37161	1	SDHA
Se	RAB7A			enzyme			0.00325	2.48812	1	VIM
Se	IL5			cytokine			0.00335	2.47496	3	ALDOC,TUBB2B,VIM
Se	glutamine			chemical - endogenous mammalian			0.00364	2.4389	2	TUBB4A,VIM
Se	EGFR			kinase			0.00414	2.383	3	TUBB4A,TUBB4B,VIM
Se	GLIPR2			other			0.00433	2.36351	1	VIM
Se	SLC6A4			transporter			0.00433	2.36351	1	GNAO1
Se	ULK1			kinase			0.00433	2.36351	1	TUBB4A
Se	miR-1285-3p (and other miRNAs w/seed CUGGGCA)			mature microrna			0.00433	2.36351	1	VIM
Se	mir-138			microrna			0.00433	2.36351	1	VIM
Se	GNG7			enzyme			0.00433	2.36351	1	GNB1
Se	LASP1			transporter			0.00433	2.36351	1	VIM
Se	GNG13			enzyme			0.00433	2.36351	1	GNB1
Se	PODXL			kinase			0.00433	2.36351	1	VIM
Hg	resiquimod			chemical drug			0.00428	2.36856	2	ATP5A1,ATP6V1B2
Se	NTRK3			kinase			0.00433	2.36351	1	SYN1
Se	M344			chemical reagent			0.00433	2.36351	1	HBZ
Se	spiperone			chemical drug			0.00433	2.36351	1	SDHA
Hg	IGF1R			transmembrane receptor			0.00443	2.3536	2	ATP5A1,ATP5H
Hg	PDGF (family)			group			0.00485	2.31426	1	HSPD1
Se x Hg	STOX1			other			0.00485	2.31426	1	ACTG1
Se	trehalose			chemical - endogenous mammalian			0.00433	2.36351	1	VIM
Hg	porfimer sodium			chemical drug			0.00485	2.31426	1	HSPD1
Se	FOLR1			transporter			0.00465	2.33255	2	ALDOC,ATP6V1B2
Se	ESRRA			ligand-dependent nuclear receptor			0.00474	2.32422	2	ALDOC,FABP3
Se	GSK3B			kinase			0.00484	2.31515	2	SYN1,TUBB4A
Se	MALAT1			other			0.00541	2.2668	1	VIM
Se	G2535			chemical reagent			0.00541	2.2668	1	VIM
Se	FAF1			other			0.00541	2.2668	1	VIM
Se	CLDN1			other			0.00541	2.2668	1	VIM
Se	LRP8			transmembrane receptor			0.00541	2.2668	1	GPX4
Se	miR-382-5p (miRNAs w/seed AAGUUGU)			mature microrna			0.00541	2.2668	1	VIM
Se	miR-431-3p (miRNAs w/seed AGGUCGU)			mature microrna			0.00541	2.2668	1	TRAP1
Se	mir-140			microrna			0.00541	2.2668	1	VIM
Se	MRAS			enzyme			0.00541	2.2668	1	VIM
Se	APAF1			other			0.00541	2.2668	1	VIM
Se	NME3			kinase			0.00541	2.2668	1	VIM
Se	PDCL			enzyme			0.00541	2.2668	1	GNB1
Hg	topotecan			chemical drug			0.00536	2.27084	2	ENO1,HSPD1
Hg	Pde			group			0.00546	2.26281	1	ATP5A1
Se	4-aminophenol			chemical - endogenous mammalian			0.00541	2.2668	1	VIM
Hg	SREBF1			transcription regulator			0.00547	2.26201	2	ALDOC,STXBP1
Se	alpha-hydroxyglutarate			chemical - endogenous mammalian			0.00541	2.2668	1	VIM
Hg	EPAS1			transcription regulator			0.00559	2.25259	2	ALDOC,ENO1
Se	vidarabine			chemical drug			0.00541	2.2668	1	FABP3
Se	CTNNB1			transcription regulator			0.00551	2.25885	4	GLUL,GNAO1,STXBP1,VIM
Se	MECP2			transcription regulator			0.00566	2.24718	2	SYN1,VIM
Se	AMPK			complex			0.00609	2.21538	2	SDHA,VIM
Se	phlorizin			chemical - endogenous non-mammalian			0.00649	2.18776	1	STXBP1
Se	EN2			transcription regulator			0.00649	2.18776	1	ALDOC
Se	miR-3118 (and other miRNAs w/seed GUGACUG)			mature microrna			0.00649	2.18776	1	GNAO1
Se	ITGA9			other			0.00649	2.18776	1	VIM
Se x Hg	MGEA5			enzyme			0.00658	2.18177	2	ACTG1,NDUFS1
Se x Hg	RHOJ			enzyme			0.00658	2.18177	1	ACTG1
Se x Hg	MED30			transcription regulator			0.00658	2.18177	1	NDUFS2
Hg	KDM8			enzyme			0.00606	2.21753	1	ENO1
Hg	CD 437			chemical drug			0.00662	2.17914	2	ATP5A1,ENO1
Hg	ELK3			transcription regulator			0.00666	2.17653	1	CCT8
Hg	enoxacin			chemical drug			0.00666	2.17653	1	ATP6V1B2
Se x Hg	peoniflorin			chemical drug			0.00692	2.15989	1	ATP5A1
Hg	3,5-diiodothyronine			chemical - endogenous mammalian			0.00666	2.17653	1	ENO1
Se	GABBR2			g-protein coupled receptor			0.00649	2.18776	1	GLUL
Hg	cigarette smoke			chemical toxicant			0.00693	2.15927	2	CCT5,HSPA9
Hg	PLD1			enzyme			0.00727	2.13847	1	STXBP1
Hg	ELK4			transcription regulator			0.00727	2.13847	1	CCT8
Se	PPID			enzyme			0.00649	2.18776	1	VIM
Se	beta-hydroxyisovaleric acid			chemical - endogenous mammalian			0.00649	2.18776	1	PSMC2
Se	HIF1A			transcription regulator			0.00711	2.14813	3	ALDOC,GPI,VIM
Se	PARP			group			0.00757	2.1209	1	VIM
Se	ZNF652			other			0.00757	2.1209	1	VIM
Se	C1orf61			other			0.00757	2.1209	1	VIM
Se	hydrogel			chemical drug			0.00757	2.1209	1	VIM
Se	miR-338-3p (miRNAs w/seed CCAGCAU)			mature microrna			0.00757	2.1209	1	VIM
Se	miR-320b (and other miRNAs w/seed AAAGCUG)			mature microrna			0.00757	2.1209	1	VIM
Se	NF2			other			0.00757	2.1209	1	GLUL
Se x Hg	GADD45A			other			0.00761	2.11862	1	PPM1A
Se x Hg	ceruletide			biologic drug			0.00761	2.11862	1	ACTG1
Hg	azetidyl-2-carboxylic acid			chemical reagent			0.00727	2.13847	1	HSPA9
Hg	ladostigil			chemical drug			0.00787	2.10403	1	ALDOC
Hg	EN1			transcription regulator			0.00787	2.10403	1	ALDOC
Hg	AK1			kinase			0.00787	2.10403	1	ENO1
Hg	PLD2			enzyme			0.00787	2.10403	1	STXBP1
Se x Hg	UHRF2			enzyme			0.0083	2.08092	1	CKB
Hg	SKF-38393			chemical reagent			0.00787	2.10403	1	HSPA9
Hg	SURF1			enzyme			0.00847	2.07212	1	SDHA
Se	MAD2L2			enzyme			0.00757	2.1209	1	VIM
Se	PGK1			kinase			0.00757	2.1209	1	VIM
Se	raclopride			chemical drug			0.00757	2.1209	1	SDHA
Se	PDGF (family)			group			0.00865	2.06298	1	VIM
Se	PLCD1			enzyme			0.00865	2.06298	1	VIM
Hg	STOX1			other			0.00847	2.07212	1	ACTG1
Hg	MITF			transcription regulator			0.00869	2.06098	2	ATP6V1B2,STXBP1
Hg	POU3F2			transcription regulator			0.00908	2.04191	1	ALDOC
Hg	amlodipine			chemical drug			0.00908	2.04191	1	ENO1
Hg	MYCN			transcription regulator			0.0092	2.03621	2	ACTG1,HSPD1
Se x Hg	grape seed extract			chemical drug			0.00968	2.01412	1	CKB
Se	NR1D2			ligand-dependent nuclear receptor			0.00865	2.06298	1	FABP3
Se	ACTA2			other			0.00865	2.06298	1	VIM
Se	CSNK2A1			kinase			0.00865	2.06298	1	VIM
Se	estradiol valerate			chemical drug			0.00972	2.01233	1	TUBB4A
Se	ROR1			kinase			0.00972	2.01233	1	VIM
Se	LOXL2			enzyme			0.00972	2.01233	1	VIM
Se	WWP2			enzyme			0.00972	2.01233	1	VIM
Se x Hg	GCK			kinase			0.0104	1.98297	1	ATP5A1
Se x Hg	NCOA4			transcription regulator			0.0104	1.98297	1	ALDH7A1
Se	SCUBE3			other			0.00972	2.01233	1	VIM
Se	MCAM			other			0.00972	2.01233	1	VIM
Se	GFAP			other			0.00972	2.01233	1	VIM
Se	LEP			growth factor			0.0107	1.97062	3	FABP3,SYN1,VIM
Se	Pdgfr			group			0.0108	1.96658	1	VIM
Se	WWC1			transcription regulator			0.0108	1.96658	1	VIM
Se	CTNND1			other			0.0108	1.96658	1	VIM
Se	RLIM			enzyme			0.0108	1.96658	1	VIM
Hg	IFT57			other			0.00968	2.01412	1	SDHA
Hg	BARX2			transcription regulator			0.0109	1.96257	1	HSPA9
Hg	RHOJ			enzyme			0.0115	1.9393	1	ACTG1
Hg	MED30			transcription regulator			0.0115	1.9393	1	SDHA
Se	miR-223-3p (miRNAs w/seed GUCAGUU)			mature microrna			0.0108	1.96658	1	VIM
Se	Cux1			transcription regulator			0.0108	1.96658	1	DPYSL3
Se	midostaurin			chemical drug			0.0108	1.96658	1	VIM
Se	pirinixic acid			chemical toxicant			0.0115	1.9393	3	ALDOC,GLUL,PSMC2
Se	valproic acid			chemical drug			0.0118	1.92812	3	GLUL,PSMC2,PSMD8
Se	SFRP4			transmembrane receptor			0.0119	1.92445	1	VIM
Se	LIMA1			other			0.0119	1.92445	1	VIM
Se	CNB-001			chemical reagent			0.0119	1.92445	1	SYN1
Hg	HOXA13			transcription regulator			0.0115	1.9393	1	ENO1
Hg	PKM			kinase			0.0121	1.91721	1	ENO1
Hg	2-mercaptoacetate			chemical - endogenous non-mammalian			0.0121	1.91721	1	ENO1
Se x Hg	OGT			enzyme			0.0124	1.90658	1	NDUFS1
Hg	IL5			cytokine			0.0122	1.91364	2	ALDOC,ENO1
Hg	AChR			complex			0.0127	1.8962	1	ALDOC
Se	ID4			transcription regulator			0.0119	1.92445	1	VIM
Se	NEUROD2			transcription regulator			0.0119	1.92445	1	DPYSL3
Se	enoxacin			chemical drug			0.0119	1.92445	1	ATP6V1B2
Se	WDR5			enzyme			0.0129	1.88941	1	VIM
Se	PLD1			enzyme			0.0129	1.88941	1	STXBP1
Se	CLCA2			ion channel			0.0129	1.88941	1	VIM
Se	TIMP3			other			0.0129	1.88941	1	VIM
Hg	benzyloxycarbonyl-Leu-Leu-Leu aldehyde			chemical - protease inhibitor			0.0129	1.88941	2	HSPA9,HSPD1
Hg	MED13			transcription regulator			0.0133	1.87615	1	ENO1
Hg	IND S1			chemical - kinase inhibitor			0.0133	1.87615	1	ENO1
Hg	Sch-23390			chemical drug			0.0133	1.87615	1	HSPA9
Se	HSF4			transcription regulator			0.0129	1.88941	1	VIM
Se	HNRNPAB			other			0.0129	1.88941	1	VIM
Se	dimethyl fumarate			chemical drug			0.0129	1.88941	1	VIM
Se	ladostigil			chemical drug			0.014	1.85387	1	ALDOC
Se	IDH2			enzyme			0.014	1.85387	1	VIM
Se	ZNF148			transcription regulator			0.014	1.85387	1	VIM
Se	EN1			transcription regulator			0.014	1.85387	1	ALDOC
Se	GNB3			enzyme			0.014	1.85387	1	GNAO1
Se	SDCBP			enzyme			0.014	1.85387	1	VIM
Hg	ceruletide			biologic drug			0.0133	1.87615	1	ACTG1
Se	PLD2			enzyme			0.014	1.85387	1	STXBP1
Se	pentylenetetrazol			chemical drug			0.014	1.85387	1	SYN1
Se	FOXO3			transcription regulator			0.0142	1.84771	2	GLUL,VIM
Se	HOXA9			transcription regulator			0.015	1.82391	2	HBZ,VIM
Se	SURF1			enzyme			0.0151	1.82102	1	SDHA
Se	YWHAG			other			0.0151	1.82102	1	GPI
Se	LAMC1			other			0.0151	1.82102	1	VIM
Se	PARK7			enzyme			0.0151	1.82102	1	VIM
Se	SPP1			cytokine			0.0155	1.80967	2	GPX4,VIM
Se	PADI2			enzyme			0.0162	1.79048	1	VIM
Se	POU3F2			transcription regulator			0.0162	1.79048	1	ALDOC
Se	mir-205			microrna			0.0162	1.79048	1	VIM
Se	GPI	1.22		enzyme			0.0162	1.79048	1	VIM
Se	RND3			enzyme			0.0162	1.79048	1	VIM
Hg	MEF2			group			0.0145	1.83863	1	LDHB
Se	calpeptin			chemical reagent			0.0162	1.79048	1	VIM
Hg	IL3			cytokine			0.0167	1.77728	2	CCT5,HSPA9
Hg	IND S7			chemical - kinase inhibitor			0.0169	1.77211	1	ENO1
Se	SOX4			transcription regulator			0.0162	1.79048	2	TUBB2B,VIM
Se	E. coli serotype 0127B8 lipopolysaccharide			chemical - endogenous non-mammalian			0.0169	1.77211	2	GLUL,GNAO1
Se	SREBF1			transcription regulator			0.017	1.76955	2	ALDOC,STXBP1
Se	DEF6			other			0.0172	1.76447	1	VIM
Se	mir-96			microrna			0.0172	1.76447	1	VIM
Se	IFT57			other			0.0172	1.76447	1	SDHA
Se x Hg	LONP1			peptidase			0.0172	1.76447	1	ATP5A1
Hg	FAAH			enzyme			0.0169	1.77211	1	ATP5H
Hg	MEL S3			chemical - kinase inhibitor			0.0175	1.75696	1	ENO1
Se	NCAM1			other			0.0172	1.76447	1	GLUL
Se x Hg	NR4A3			ligand-dependent nuclear receptor			0.0179	1.74715	1	ATP5A1
Hg	GCK			kinase			0.0181	1.74232	1	ATP5A1
Se x Hg	iron			chemical - endogenous mammalian			0.0183	1.73755	1	NDUFS1
Se	reserpine			chemical drug			0.0172	1.76447	1	GNAO1
Se	GATA3			transcription regulator			0.0179	1.74715	2	GLUL,VIM
Se	WNT7A			cytokine			0.0183	1.73755	1	SYN1
Se	FABP5			transporter			0.0183	1.73755	1	FABP3
Se	THY1			other			0.0183	1.73755	1	VIM
Se	MUC4			other			0.0183	1.73755	1	VIM
Se	miR-1-3p (and other miRNAs w/seed GGAAUGU)			mature microrna			0.0186	1.73049	2	ATP6V1B2,YWHAQ
Se	GLI1			transcription regulator			0.019	1.72125	2	SDHA,VIM
Se	SP1			transcription regulator			0.0192	1.7167	3	GPX4,HBZ,VIM
Se	GLIS2			transcription regulator			0.0194	1.7122	1	VIM
Hg	RAB1B			other			0.0199	1.70115	1	STXBP1
Hg	GAPDH			enzyme			0.0199	1.70115	1	ENO1
Hg	bardoxolone			chemical drug			0.0199	1.70115	1	HSPA9
Se x Hg	trichloroethylene			chemical toxicant			0.02	1.69897	1	NDUFS1
Se x Hg	benzene			chemical toxicant			0.02	1.69897	1	NDUFS1
Hg	MGEA5			enzyme			0.0201	1.6968	2	ACTG1,ALDOC
Hg	HIF1A			transcription regulator			0.0203	1.6925	2	ALDOC,ENO1
Se	mir-183			microrna			0.0194	1.7122	1	VIM
Se	MST1R			kinase			0.0194	1.7122	1	VIM
Hg	mercuric chloride			chemical toxicant			0.0205	1.68825	1	HSPA9
Se x Hg	Y 27632			chemical drug			0.0206	1.68613	1	ACTG1
Se	MED30			transcription regulator			0.0204	1.69037	1	SDHA
Se	ETV1			transcription regulator			0.0204	1.69037	1	VIM
Se	1,2-dithiol-3-thione			chemical reagent			0.0212	1.67366	2	PSMC2,PSMD8
Hg	CUL4B			other			0.0217	1.66354	1	HSPA9
Hg	amiodarone			chemical drug			0.0223	1.6517	1	HSPD1
Se x Hg	heparin			chemical - endogenous mammalian			0.0223	1.6517	1	ATP5A1
Se	streptozocin			chemical drug			0.0214	1.66959	2	FABP3,VIM
Se	TFAM			transcription regulator			0.0215	1.66756	1	FABP3
Se	AChR			complex			0.0225	1.64782	1	ALDOC
Se	BTRC			enzyme			0.0225	1.64782	1	GLUL
Se	AZGP1			transporter			0.0225	1.64782	1	VIM
Se	cannabidiol			chemical drug			0.0225	1.64782	1	VIM
Se x Hg	methylmercury			chemical toxicant			0.0227	1.64397	1	NDUFS1
Hg	CP-55940			chemical reagent			0.0228	1.64207	1	ALDOC
Hg	nitrofen			chemical toxicant			0.0228	1.64207	1	ENO1
Hg	rasagiline			chemical drug			0.0228	1.64207	1	ALDOC
Hg	NFE2L2			transcription regulator			0.0233	1.63264	2	ACTG1,HSPA9
Se	PPARGC1A			transcription regulator			0.0226	1.64589	2	FABP3,SDHA
Hg	verapamil			chemical drug			0.0234	1.63078	1	ENO1
Se	STAT4			transcription regulator			0.0234	1.63078	2	ALDOC,TUBB2B
Se	p70 S6k			group			0.0236	1.62709	1	VIM
Se	KDM6B			enzyme			0.0236	1.62709	1	VIM
Hg	ouabain			chemical drug			0.024	1.61979	1	HSPA9
Hg	T3-TR-RXR			complex			0.0246	1.60906	1	ENO1
Se	POSTN			other			0.0236	1.62709	1	VIM
Se	sorafenib			chemical drug			0.0247	1.6073	1	VIM
Hg	PRNP			other			0.0252	1.5986	1	HSPA9
Se	lipoarabinomannan			chemical - endogenous non-mammalian			0.0247	1.6073	1	GNB1
Se	PDGF-AA			complex			0.0257	1.59007	1	VIM
Se	oleoyl-estrone			chemical drug			0.0257	1.59007	1	PSMC2
Hg	brefeldin A			chemical - endogenous non-mammalian			0.0264	1.5784	1	HSPA9
Se	TWIST2			transcription regulator			0.0257	1.59007	1	VIM
Se	MITF			transcription regulator			0.0266	1.57512	2	ATP6V1B2,STXBP1
Se	miR-200b-3p (and other miRNAs w/seed AAUACUG)			mature microrna			0.0268	1.57187	1	VIM
Hg	FMR1			translation regulator			0.027	1.56864	1	ENO1
Se x Hg	DYSF			other			0.0271	1.56703	1	ACTG1
Se	HEXIM1			transcription regulator			0.0268	1.57187	1	VIM
Se	ZEB2			transcription regulator			0.0278	1.55596	1	VIM
Se	CCR1			g-protein coupled receptor			0.0278	1.55596	1	VIM
Se	SRSF2			transcription regulator			0.0278	1.55596	1	VIM
Hg	NRF1			transcription regulator			0.0288	1.54061	1	SDHA
Hg	ELK1			transcription regulator			0.0288	1.54061	1	CCT8
Se	MYCN			transcription regulator			0.0281	1.55129	2	DPYSL3,VIM
Se x Hg	nocodazole			chemical reagent			0.0291	1.53611	1	PPM1A
Se	SRSF1			other			0.0289	1.5391	1	VIM
Hg	PPARGC1B			transcription regulator			0.0294	1.53165	1	ENO1
Hg	guanidinopropionic acid			chemical - endogenous non-mammalian			0.0294	1.53165	1	SDHA
Se	lipopolysaccharide			chemical drug			0.0294	1.53165	5	FABP3,STXBP1,TUBB4B,VIM,YWHAQ
Se	grape seed extract			chemical drug			0.03	1.52288	1	VIM
Se	PLIN5			other			0.03	1.52288	1	GPX4
Se	PRKAR1A			kinase			0.03	1.52288	1	VIM
Hg	ZBTB20			transcription regulator			0.0306	1.51428	1	LDHB
Se	IND S7			chemical - kinase inhibitor			0.03	1.52288	1	VIM
Se	caspase			group			0.031	1.50864	1	GLUL
Se	LRP6			transmembrane receptor			0.031	1.50864	1	VIM
Se	MEL S3			chemical - kinase inhibitor			0.031	1.50864	1	VIM
Se	HOXA7			transcription regulator			0.031	1.50864	1	VIM
Hg	NR4A3			ligand-dependent nuclear receptor			0.0311	1.50724	1	ATP5A1
Hg	salirasib			chemical drug			0.0311	1.50724	1	ALDOC
Se x Hg	SLC13A1			transporter			0.0315	1.50169	1	ACTG1
Se x Hg	MEF2C			transcription regulator			0.0315	1.50169	1	CKB
Hg	SCAP			other			0.0317	1.49894	1	ALDOC
Se	bufalin			chemical reagent			0.031	1.50864	1	YWHAQ
Se	PRKAA			group			0.0321	1.49349	1	VIM
Se	SFRP1			transmembrane receptor			0.0321	1.49349	1	VIM
Se	MIR124			group			0.0321	1.49349	1	VIM
Se	BSG			transporter			0.0321	1.49349	1	VIM
Se	NFE2L1			transcription regulator			0.0321	1.49349	1	PSMC2
Se	IFRD1			other			0.0321	1.49349	1	SYN1
Se	MAPK7			kinase			0.0321	1.49349	1	VIM
Hg	DDIT3			transcription regulator			0.0323	1.4908	1	HSPD1
Se x Hg	ESRRA			ligand-dependent nuclear receptor			0.0325	1.48812	1	CKB
Se	NCOA4			transcription regulator			0.0321	1.49349	1	ALDH7A1
Se	prostaglandin J2			chemical - endogenous non-mammalian			0.0331	1.48017	1	PSMD8
Se	panobinostat			chemical drug			0.0331	1.48017	1	VIM
Se	ETV4			transcription regulator			0.0331	1.48017	1	VIM
Se	NPY			other			0.0331	1.48017	1	GPX4
Se	RXRG			ligand-dependent nuclear receptor			0.0331	1.48017	1	FABP3
Se	fisetin			chemical toxicant			0.0331	1.48017	1	VIM
Hg	PLN			transporter			0.0335	1.47496	1	ENO1
Hg	Pln			other			0.0341	1.46725	1	ENO1
Se	selenium			chemical drug			0.0331	1.48017	1	GPX4
Se	CASP1			peptidase			0.0342	1.46597	1	VIM
Se	SCARB1			transporter			0.0342	1.46597	1	FABP3
Se x Hg	berberine			chemical drug			0.0342	1.46597	1	ATP5A1
Se	GJA1			transporter			0.0342	1.46597	1	VIM
Se	RAB1B			other			0.0352	1.45346	1	STXBP1
Se	S100A4			other			0.0352	1.45346	1	VIM
Se	TERC			other			0.0352	1.45346	1	GPI
Hg	Y 27632			chemical drug			0.0359	1.44491	1	ACTG1
Se	PTTG1			transcription regulator			0.0352	1.45346	1	VIM
Hg	NRIP1			transcription regulator			0.0364	1.4389	1	LDHB
Se	oxaliplatin			chemical drug			0.0363	1.44009	1	VIM
Se x Hg	ciprofloxacin			chemical drug			0.0372	1.42946	1	ATP5A1
Se	MSX2			transcription regulator			0.0373	1.42829	1	VIM
Se	IDH1			enzyme			0.0373	1.42829	1	VIM
Se	EPO			cytokine			0.0374	1.42713	2	ATP6V1B2,GLUL
Se	XDH			enzyme			0.0384	1.41567	1	VIM
Se	PLAUR			transmembrane receptor			0.0384	1.41567	1	VIM
Se	NCSTN			peptidase			0.0384	1.41567	1	VIM
Se	OGT			enzyme			0.0384	1.41567	1	VIM
Se	NEDD9			other			0.0384	1.41567	1	VIM
Se	benzyloxycarbonyl-Leu-Leu-Leu aldehyde			chemical - protease inhibitor			0.0389	1.41005	2	PSMC2,TUBB4A
Se x Hg	MAP4K4			kinase			0.0389	1.41005	1	NDUFS1
Hg	dihydrotestosterone			chemical - endogenous mammalian			0.0392	1.40671	2	ENO1,STXBP1
Hg	FOS			transcription regulator			0.04	1.39794	2	ACTG1,ENO1
Se	CP-55940			chemical reagent			0.0404	1.39362	1	ALDOC
Se	ESRRG			ligand-dependent nuclear receptor			0.0404	1.39362	1	ALDOC
Se	rasagiline			chemical drug			0.0404	1.39362	1	ALDOC
Se	WHSC1			enzyme			0.0404	1.39362	1	TUBB4A
Se	TFAP4			transcription regulator			0.0404	1.39362	1	VIM
Se	HDAC6			transcription regulator			0.0404	1.39362	1	VIM
Se	NKX2-5			transcription regulator			0.0404	1.39362	1	SYN1
Hg	SREBF2			transcription regulator			0.0411	1.38616	1	ALDOC
Se x Hg	PML			transcription regulator			0.0412	1.3851	1	ACTG1
Hg	PD98059			chemical - kinase inhibitor			0.0414	1.383	2	ATP6V1B1,ENO1
Se	AKT2			kinase			0.0415	1.38195	1	VIM
Se x Hg	BMP7			growth factor			0.0416	1.38091	1	ATP5A1
Se x Hg	IRS1			enzyme			0.0419	1.37779	1	ATP5A1
Se x Hg	INS			other			0.0423	1.37366	1	ATP5A1
Se	bicalutamide			chemical drug			0.0425	1.37161	1	VIM
Hg	(+)-MK-801			chemical drug			0.0429	1.36754	1	STXBP1
Se	Laminin			complex			0.0436	1.36051	1	VIM
Se	MUC1			other			0.0436	1.36051	1	VIM
Se	emodin			chemical drug			0.0436	1.36051	1	VIM
Se x Hg	ADORA2A			g-protein coupled receptor			0.0436	1.36051	1	CKB
Se	BCL3			transcription regulator			0.0446	1.35067	1	FABP3
Se	KLF11			transcription regulator			0.0446	1.35067	1	FABP3
Se	phenacetin			chemical drug			0.0446	1.35067	1	VIM
Hg	HRAS			enzyme			0.0451	1.34582	2	ACTG1,SDHA
Se	Ins1			other			0.0452	1.34486	2	FABP3,VIM
Hg	SOX11			transcription regulator			0.0452	1.34486	1	HSPD1
Hg	tetracycline			chemical drug			0.0452	1.34486	1	HSPD1
Se	PIK3CA			kinase			0.0456	1.34104	1	VIM
Se	GPX1			enzyme			0.0456	1.34104	1	GPX4
Se	SNAI2			transcription regulator			0.0456	1.34104	1	VIM
Se	methyl methanesulfonate			chemical toxicant			0.0456	1.34104	1	VIM
Se x Hg	halofuginone			chemical drug			0.0466	1.33161	1	CKB
Se x Hg	5-azacytidine			chemical drug			0.0466	1.33161	1	ATP5A1
Se	APLN			other			0.0467	1.33068	1	HBZ
Se	KLF15			transcription regulator			0.0467	1.33068	1	FABP3
Hg	DYSF			other			0.047	1.3279	1	ACTG1
Se x Hg	methapyrilene			chemical drug			0.0473	1.32514	1	ACTG1
Hg	SNCA			enzyme			0.0475	1.32331	1	LDHB
Se	BMI1			transcription regulator			0.0477	1.32148	1	VIM
Se	FMR1			translation regulator			0.0477	1.32148	1	SYN1
Se	dimethylnitrosamine			chemical toxicant			0.0477	1.32148	1	VIM
Se	vincristine			chemical drug			0.0477	1.32148	1	YWHAQ
Se x Hg	17-alpha-ethinylestradiol			chemical drug			0.0479	1.31966	1	CKB
Hg	6-hydroxydopamine			chemical toxicant			0.0481	1.31785	1	HSPA9
Hg	zinc			chemical drug			0.0487	1.31247	1	ENO1
Se	IL32			cytokine			0.0488	1.31158	1	VIM
Se	NRL			transcription regulator			0.0488	1.31158	1	GNB1
Se	mir-182			microrna			0.0498	1.30277	1	VIM
Se	aldesleukin			biologic drug			0.0498	1.30277	1	GLUL
